# Supplementary material for: Next Generation Sequencing to Define Prokaryotic and Fungal Diversity in the Bovine Rumen
Source: PubMed Central journal article supplement (PMC3492333; doi:10.1371/journal.pone.0048289), 2012-11-07

**Figure S3. Eukaryotic sequence alignments with SILVA and *S. cerevisiae* coordinates.**

A) Rumen eukaryotic sequences in public repositories aligned to SILVA.

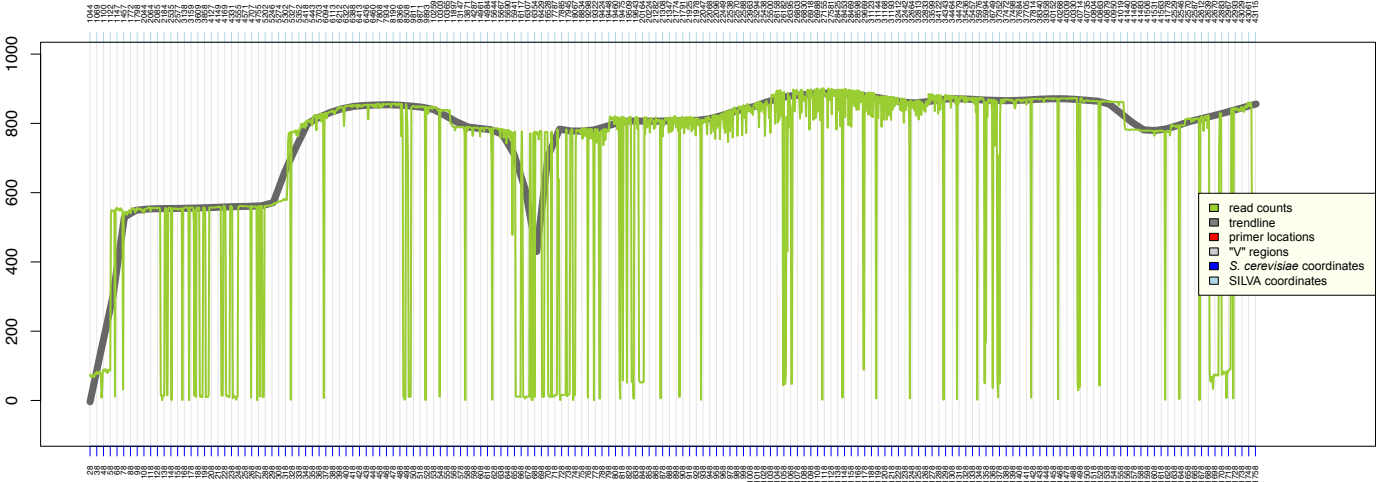

B) Fungal reads from this study aligned to SILVA

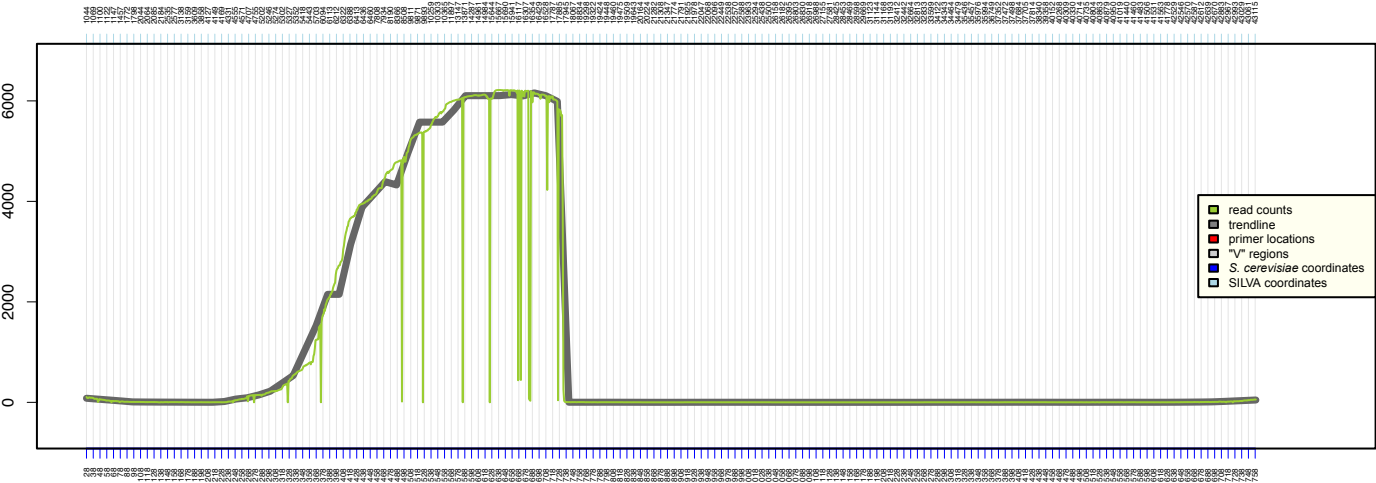

Supplement: pone.0048289.s003.pdf [file pone.0048289.s003.pdf]
