# Supplementary material for: Next Generation Sequencing to Define Prokaryotic and Fungal Diversity in the Bovine Rumen
Source: PubMed Central journal article supplement (PMC3492333; doi:10.1371/journal.pone.0048289), 2012-11-07

Figure S4. Comparison of rumen sequences obtained from public repositories.

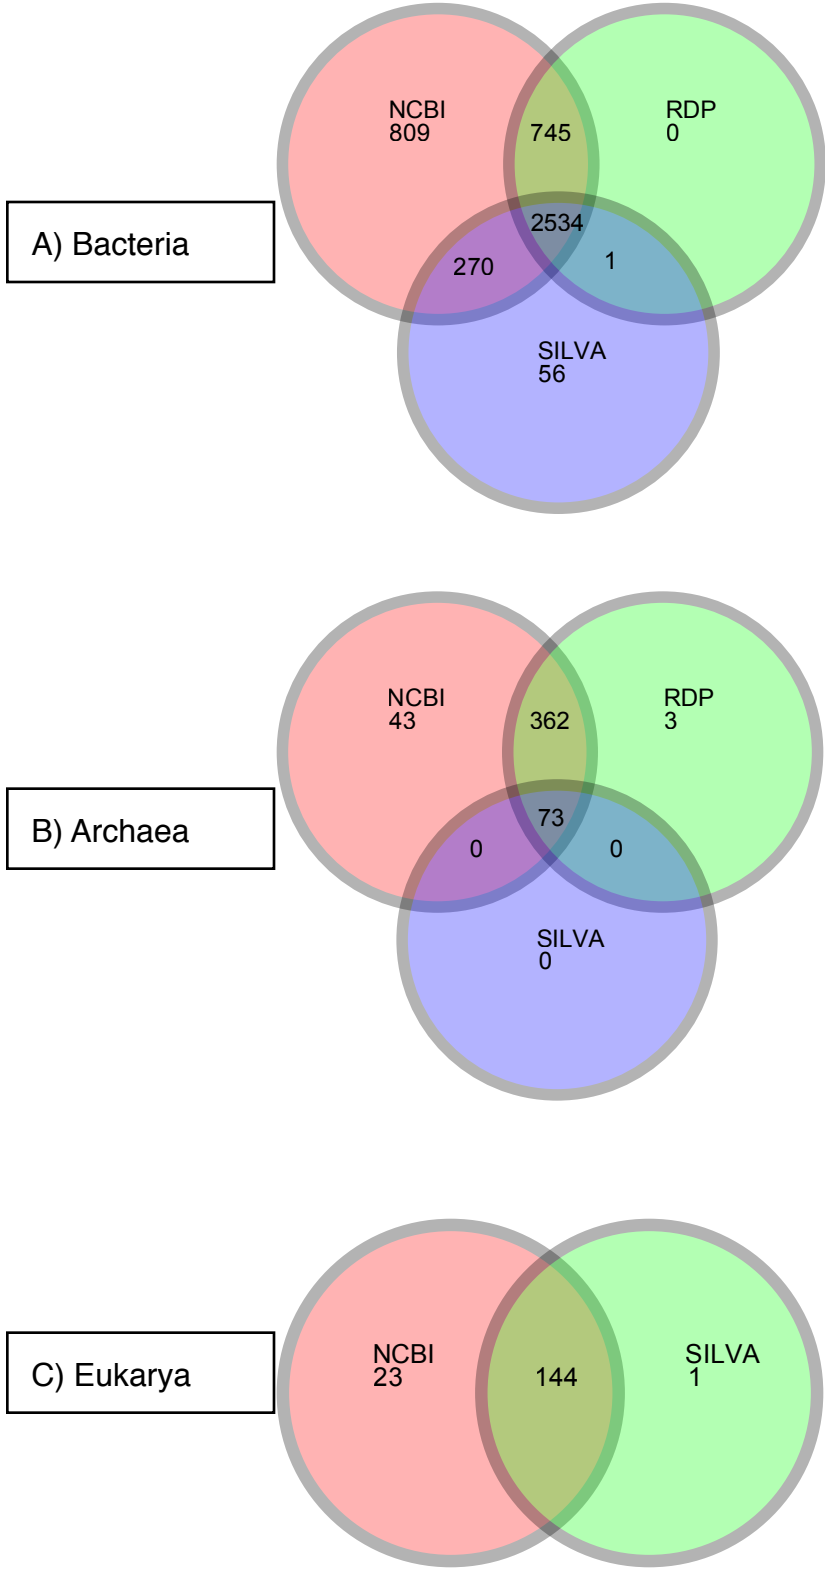

Supplement: pone.0048289.s004.pdf [file pone.0048289.s004.pdf]
