# Supplementary material for: Next Generation Sequencing to Define Prokaryotic and Fungal Diversity in the Bovine Rumen
Source: PubMed Central journal article supplement (PMC3492333; doi:10.1371/journal.pone.0048289), 2012-11-07
Supplement: pone.0048289.s005.pdf [file pone.0048289.s005.pdf]

**TableS1**

|          | Label     | # public sequences retrieved | # unique & trimmed sequences | # of OTUs | Inv Simpson    | Chao                 |
|----------|-----------|------------------------------|------------------------------|-----------|----------------|----------------------|
| Bacteria | REF_NCBI  | 22485                        | 16046                        | 4358      | 763 (727, 802) | 8,176 (7,763, 8,641) |
|          | REF_RDP   | 15637                        | 10579                        | 3280      | 573 (539, 611) | 6,518 (6,123, 6,966) |
|          | REF_SILVA | 12153                        | 9044                         | 2861      | 390 (365, 418) | 6,063 (5,651, 6,536) |
| Archaea  | REF_NCBI  | 4198                         | 3078                         | 478       | 10 (9, 11)     | 1,985 (1,521, 2,655) |
|          | REF_RDP   | 3703                         | 2783                         | 438       | 9 (8, 10)      | 1,722 (1,322, 2,303) |
|          | REF_SILVA | 1120                         | 938                          | 73        | 8 (7, 9)       | 151 (106, 260)       |
| Eukarya  | REF_NCBI  | 1803                         | 984                          | 167       | 10 (9, 11)     | 782 (499, 1,308)     |
|          | REF_SILVA | 1027                         | 764                          | 145       | 9 (8, 10)      | 801 (478, 1,435)     |

| Shannon           | Shannon<br>Evenness | Coverage |
|-------------------|---------------------|----------|
| 7.54 (7.51, 7.56) | 0.90                | 85.63%   |
| 7.29 (7.27, 7.32) | 0.90                | 82.62%   |
| 7.06 (7.03, 7.10) | 0.89                | 81.39%   |
| 3.80 (3.72, 3.88) | 0.62                | 88.56%   |
| 3.67 (3.58, 3.75) | 0.60                | 88.32%   |
| 2.76 (2.66, 2.85) | 0.64                | 95.95%   |
| 3.27 (3.16, 3.39) | 0.64                | 87.09%   |
| 3.13 (3.00, 3.27) | 0.63                | 84.95%   |
