# Supplementary material for: Next Generation Sequencing to Define Prokaryotic and Fungal Diversity in the Bovine Rumen
Source: PubMed Central journal article supplement (PMC3492333; doi:10.1371/journal.pone.0048289), 2012-11-07
Supplement: pone.0048289.s006.pdf [file pone.0048289.s006.pdf]

Table S2

| label                             | Wilcoxon | Bolus   |       | Liquid  |       | liquid - bolus |
|-----------------------------------|----------|---------|-------|---------|-------|----------------|
|                                   |          | Average | SD    | Average | SD    |                |
| <i>Zhangella</i>                  | 2.45E-05 | 0.01%   | 0.03% | 0.18%   | 0.04% | 0.17%          |
| <i>Tannerella</i>                 | 3.66E-05 | 0.74%   | 0.26% | 1.73%   | 0.27% | 1.00%          |
| <i>Prevotella</i>                 | 3.66E-05 | 2.73%   | 1.18% | 9.92%   | 3.39% | 7.18%          |
| <b>Unclassified Subdivision 5</b> | 5.57E-05 | 0.12%   | 0.12% | 0.69%   | 0.36% | 0.57%          |
| <i>Butyrivibrio</i>               | 6.01E-05 | 5.26%   | 1.02% | 2.98%   | 0.53% | -2.27%         |
| <i>Blautia</i>                    | 8.61E-05 | 1.07%   | 0.26% | 0.45%   | 0.24% | -0.62%         |
| <i>Nubsella</i>                   | 0.0001   | 0.09%   | 0.11% | 0.51%   | 0.28% | 0.42%          |
