# Supplementary material for: Next Generation Sequencing to Define Prokaryotic and Fungal Diversity in the Bovine Rumen
Source: PubMed Central journal article supplement (PMC3492333; doi:10.1371/journal.pone.0048289), 2012-11-07
Supplement: pone.0048289.s008.pdf [file pone.0048289.s008.pdf]

**Table S4**

| <b>a</b>                       | <b>b</b>                     | <b>r</b>  | <b>pval</b> | <b>qval</b> | <b>lfd</b> |
|--------------------------------|------------------------------|-----------|-------------|-------------|------------|
| Verrucomicrobia_Subdivision3_B | Anaerolineae_B               | -8.93E-01 | 4.01E-04    | 4.75E-02    | 1.41E-01   |
| Thermomicrobia_B               | Aquificae_B                  | 1.00E+00  | 2.22E-16    | 5.48E-14    | 3.50E-04   |
| Thermotogae_B                  | Unclassified_Bacteroidetes_B | -9.82E-01 | 2.83E-07    | 5.83E-05    | 1.36E-02   |
| Unclassified_Pezizomycotina_F  | Caldilineae_B                | -1.00E+00 | 2.22E-16    | 5.48E-14    | 3.50E-04   |
| Spirochaetia_B                 | Fibrobacteria_B              | 8.95E-01  | 3.67E-04    | 4.48E-02    | 1.41E-01   |
| Tremellomycetes_F              | Gemmatimonadetes_B           | -9.56E-01 | 1.13E-05    | 1.99E-03    | 1.41E-01   |
| Pezizomycetes_F                | Halobacteria_A               | 1.00E+00  | 2.22E-16    | 5.48E-14    | 3.50E-04   |
| Thermoprotei_A                 | Halobacteria_A               | 1.00E+00  | 2.22E-16    | 5.48E-14    | 3.50E-04   |
| Thermoprotei_A                 | Pezizomycetes_F              | 1.00E+00  | 2.22E-16    | 5.48E-14    | 3.50E-04   |
| Verrucomicrobiae_B             | Tremellomycetes_F            | 9.01E-01  | 2.92E-04    | 3.81E-02    | 1.41E-01   |
