# Supplementary material for: Next Generation Sequencing to Define Prokaryotic and Fungal Diversity in the Bovine Rumen
Source: PLoS One. 2012 Nov 7;7(11):e48289. doi: 10.1371/journal.pone.0048289 (PMC3492333; doi:10.1371/journal.pone.0048289)
Supplement: Table S3 — Correlations among bacterial, archaeal, and fungal genera. (PDF) [file pone.0048289.s007.pdf]

**Table S3**

| <b>a</b>                   | <b>b</b>              | <b>r</b>  | <b>pval</b> | <b>qval</b> | <b>lfdr</b> |
|----------------------------|-----------------------|-----------|-------------|-------------|-------------|
| Sediminicola_B             | Abiotrophia_B         | 9.91E-01  | 1.88E-10    | 1.85E-08    | 5.47E-06    |
| Syntrophothermus_B         | Abiotrophia_B         | 1.00E+00  | 2.22E-16    | 2.21E-14    | 1.90E-06    |
| Carnobacterium_B           | Acetanaerobacterium_B | 8.52E-01  | 3.27E-04    | 1.87E-02    | 2.17E-01    |
| Malonomonas_B              | Acetanaerobacterium_B | -8.29E-01 | 6.66E-04    | 3.50E-02    | 2.17E-01    |
| Proteocatella_B            | Acetanaerobacterium_B | 8.96E-01  | 5.69E-05    | 3.85E-03    | 6.01E-02    |
| Atopobium_B                | Acetitomaculum_B      | 8.55E-01  | 2.97E-04    | 1.72E-02    | 2.17E-01    |
| Brevibacterium_B           | Acetitomaculum_B      | -9.66E-01 | 1.81E-07    | 1.69E-05    | 2.21E-03    |
| Desulfonatronospira_B      | Acetitomaculum_B      | 9.59E-01  | 4.70E-07    | 4.32E-05    | 2.21E-03    |
| Faecalibacterium_B         | Acetivibrio_B         | 8.84E-01  | 9.51E-05    | 6.16E-03    | 6.01E-02    |
| Hydrogenoanaerobacterium_B | Acetivibrio_B         | 9.03E-01  | 3.98E-05    | 2.76E-03    | 4.17E-02    |
| Pseudozobellia_B           | Acetivibrio_B         | 8.18E-01  | 8.87E-04    | 4.47E-02    | 2.68E-01    |
| Alkalibacterium_B          | Acetohalobium_B       | -9.18E-01 | 1.66E-05    | 1.24E-03    | 7.84E-03    |
| Bimuria_F                  | Acetohalobium_B       | -9.18E-01 | 1.66E-05    | 1.24E-03    | 7.84E-03    |
| Brachymonas_B              | Acetohalobium_B       | -9.18E-01 | 1.66E-05    | 1.24E-03    | 7.84E-03    |
| Bulleidia_B                | Acetohalobium_B       | -8.74E-01 | 1.45E-04    | 8.92E-03    | 7.38E-02    |
| Desemzia_B                 | Acetohalobium_B       | -9.18E-01 | 1.66E-05    | 1.24E-03    | 7.84E-03    |
| Desulfatiferula_B          | Acetohalobium_B       | -9.18E-01 | 1.66E-05    | 1.24E-03    | 7.84E-03    |
| Holtermannia_F             | Acetohalobium_B       | -9.18E-01 | 1.66E-05    | 1.24E-03    | 7.84E-03    |
| Leuconostoc_B              | Acetohalobium_B       | -9.18E-01 | 1.66E-05    | 1.24E-03    | 7.84E-03    |
| Levilinea_B                | Acetohalobium_B       | 8.71E-01  | 1.63E-04    | 9.92E-03    | 1.04E-01    |
| Parasporobacterium_B       | Acetohalobium_B       | -8.85E-01 | 9.33E-05    | 6.06E-03    | 6.01E-02    |
| Phascolarctobacterium_B    | Acetohalobium_B       | -9.18E-01 | 1.66E-05    | 1.24E-03    | 7.84E-03    |
| Pirellula_B                | Acetohalobium_B       | -9.18E-01 | 1.66E-05    | 1.24E-03    | 7.84E-03    |
| Rudanella_B                | Acetohalobium_B       | -9.18E-01 | 1.66E-05    | 1.24E-03    | 7.84E-03    |
| Thermonema_B               | Acetohalobium_B       | -9.18E-01 | 1.66E-05    | 1.24E-03    | 7.84E-03    |
| Tropheryma_B               | Acetohalobium_B       | -9.18E-01 | 1.66E-05    | 1.24E-03    | 7.84E-03    |
| Unc_Cryptococcus_F         | Acetohalobium_B       | -9.18E-01 | 1.66E-05    | 1.24E-03    | 7.84E-03    |
| Verminephrobacter_B        | Acetohalobium_B       | -9.18E-01 | 1.66E-05    | 1.24E-03    | 7.84E-03    |

|                                     |                   |           |          |          |          |
|-------------------------------------|-------------------|-----------|----------|----------|----------|
| Coenonia_B                          | Acholeplasma_B    | 1.00E+00  | 2.22E-16 | 2.21E-14 | 1.90E-06 |
| Fulvimonas_B                        | Acholeplasma_B    | 1.00E+00  | 2.22E-16 | 2.21E-14 | 1.90E-06 |
| Fulvivirga_B                        | Acholeplasma_B    | 1.00E+00  | 2.22E-16 | 2.21E-14 | 1.90E-06 |
| Jonesia_B                           | Acholeplasma_B    | 1.00E+00  | 2.22E-16 | 2.21E-14 | 1.90E-06 |
| Lishizhenia_B                       | Acholeplasma_B    | 1.00E+00  | 2.22E-16 | 2.21E-14 | 1.90E-06 |
| Ornithobacterium_B                  | Acholeplasma_B    | -9.11E-01 | 2.50E-05 | 1.78E-03 | 3.13E-02 |
| Parachlamydia_B                     | Acholeplasma_B    | 1.00E+00  | 2.22E-16 | 2.21E-14 | 1.90E-06 |
| Sphaerobacter_B                     | Acholeplasma_B    | 1.00E+00  | 2.22E-16 | 2.21E-14 | 1.90E-06 |
| Sporanaerobacter_B                  | Acholeplasma_B    | 1.00E+00  | 2.22E-16 | 2.21E-14 | 1.90E-06 |
| Unc_Kockovaella_F                   | Acholeplasma_B    | 1.00E+00  | 2.22E-16 | 2.21E-14 | 1.90E-06 |
| Venenivibrio_B                      | Acholeplasma_B    | 1.00E+00  | 2.22E-16 | 2.21E-14 | 1.90E-06 |
| Zunongwangia_B                      | Acholeplasma_B    | 1.00E+00  | 2.22E-16 | 2.21E-14 | 1.90E-06 |
| Longilinea_B                        | Acidaminobacter_B | -8.51E-01 | 3.41E-04 | 1.95E-02 | 2.17E-01 |
| Isobaculum_B                        | Actinobaculum_B   | -9.54E-01 | 8.47E-07 | 7.66E-05 | 2.21E-03 |
| Schlesneria_B                       | Actinobaculum_B   | 1.00E+00  | 2.22E-16 | 2.21E-14 | 1.90E-06 |
| Bdellovibrio_B                      | Adlercreutzia_B   | -9.54E-01 | 8.47E-07 | 7.66E-05 | 2.21E-03 |
| Kosmotoga_B                         | Adlercreutzia_B   | -9.54E-01 | 8.47E-07 | 7.66E-05 | 2.21E-03 |
| Thermovirga_B                       | Adlercreutzia_B   | 8.45E-01  | 4.04E-04 | 2.27E-02 | 2.17E-01 |
| Alkaliphilus_B                      | Aeriscardovia_B   | 1.00E+00  | 2.22E-16 | 2.21E-14 | 1.90E-06 |
| Coriobacterium_B                    | Aeriscardovia_B   | 1.00E+00  | 2.22E-16 | 2.21E-14 | 1.90E-06 |
| Desulfotomaculum_B                  | Aeriscardovia_B   | 1.00E+00  | 2.22E-16 | 2.21E-14 | 1.90E-06 |
| Ganoderma_F                         | Aeriscardovia_B   | 1.00E+00  | 2.22E-16 | 2.21E-14 | 1.90E-06 |
| Geosmithia_putterillii_sensu_Pitt_F | Aeriscardovia_B   | -9.16E-01 | 1.90E-05 | 1.39E-03 | 1.77E-02 |
| Johnsonella_B                       | Aeriscardovia_B   | 1.00E+00  | 2.22E-16 | 2.21E-14 | 1.90E-06 |
| Leptonema_B                         | Aeriscardovia_B   | 1.00E+00  | 2.22E-16 | 2.21E-14 | 1.90E-06 |
| Lutimonas_B                         | Aeriscardovia_B   | 1.00E+00  | 2.22E-16 | 2.21E-14 | 1.90E-06 |
| Massilia_B                          | Aeriscardovia_B   | 1.00E+00  | 2.22E-16 | 2.21E-14 | 1.90E-06 |
| Parasegetibacter_B                  | Aeriscardovia_B   | -9.42E-01 | 2.86E-06 | 2.46E-04 | 7.84E-03 |
| Schwartzia_B                        | Aeriscardovia_B   | -9.26E-01 | 9.83E-06 | 7.85E-04 | 7.84E-03 |
| Tepidanaerobacter_B                 | Aeriscardovia_B   | 1.00E+00  | 2.22E-16 | 2.21E-14 | 1.90E-06 |

|                        |                   |           |          |          |          |
|------------------------|-------------------|-----------|----------|----------|----------|
| Thermoflavimicrobium_B | Aeriscardovia_B   | 1.00E+00  | 2.22E-16 | 2.21E-14 | 1.90E-06 |
| Unc_Verticillium_F     | Aeriscardovia_B   | 1.00E+00  | 2.22E-16 | 2.21E-14 | 1.90E-06 |
| Guggenheimella_B       | Aeromicrobium_B   | -9.72E-01 | 6.40E-08 | 6.11E-06 | 2.87E-04 |
| Lentisphaera_B         | Aeromicrobium_B   | 1.00E+00  | 2.22E-16 | 2.21E-14 | 1.90E-06 |
| Sedimentibacter_B      | Aeromicrobium_B   | -9.54E-01 | 8.47E-07 | 7.66E-05 | 2.21E-03 |
| Xylanibacter_B         | Aeromicrobium_B   | -8.20E-01 | 8.40E-04 | 4.26E-02 | 2.68E-01 |
| Alloscardovia_B        | Akkermansia_B     | 1.00E+00  | 2.22E-16 | 2.21E-14 | 1.90E-06 |
| Anaerofilum_B          | Akkermansia_B     | -9.21E-01 | 1.40E-05 | 1.07E-03 | 7.84E-03 |
| Atopobacter_B          | Akkermansia_B     | 1.00E+00  | 2.22E-16 | 2.21E-14 | 1.90E-06 |
| Bellilinea_B           | Akkermansia_B     | -8.66E-01 | 1.97E-04 | 1.17E-02 | 1.04E-01 |
| Blautia_B              | Akkermansia_B     | -8.83E-01 | 9.96E-05 | 6.43E-03 | 6.06E-02 |
| Catonella_B            | Akkermansia_B     | -8.73E-01 | 1.53E-04 | 9.35E-03 | 1.04E-01 |
| Clostridiisalibacter_B | Akkermansia_B     | 1.00E+00  | 2.22E-16 | 2.21E-14 | 1.90E-06 |
| Desulforegula_B        | Akkermansia_B     | 1.00E+00  | 2.22E-16 | 2.21E-14 | 1.90E-06 |
| Enterorhabdus_B        | Akkermansia_B     | -9.17E-01 | 1.75E-05 | 1.30E-03 | 7.84E-03 |
| Haloglycomyces_B       | Akkermansia_B     | 1.00E+00  | 2.22E-16 | 2.21E-14 | 1.90E-06 |
| Hespellia_B            | Akkermansia_B     | -9.70E-01 | 1.04E-07 | 9.77E-06 | 3.19E-04 |
| Microscilla_B          | Akkermansia_B     | 1.00E+00  | 2.22E-16 | 2.21E-14 | 1.90E-06 |
| Petrimonas_B           | Akkermansia_B     | 1.00E+00  | 2.22E-16 | 2.21E-14 | 1.90E-06 |
| Porphyromonas_B        | Akkermansia_B     | 1.00E+00  | 2.22E-16 | 2.21E-14 | 1.90E-06 |
| Propionibacterium_B    | Akkermansia_B     | 1.00E+00  | 2.22E-16 | 2.21E-14 | 1.90E-06 |
| Pseudomonas_B          | Akkermansia_B     | 1.00E+00  | 2.22E-16 | 2.21E-14 | 1.90E-06 |
| Sanguibacter_B         | Akkermansia_B     | 1.00E+00  | 2.22E-16 | 2.21E-14 | 1.90E-06 |
| Shuttleworthia_B       | Akkermansia_B     | -8.88E-01 | 8.23E-05 | 5.41E-03 | 6.01E-02 |
| Spirochaeta_B          | Akkermansia_B     | 1.00E+00  | 2.22E-16 | 2.21E-14 | 1.90E-06 |
| unclassified_F         | Akkermansia_B     | -8.44E-01 | 4.25E-04 | 2.37E-02 | 2.17E-01 |
| Bavariicoccus_B        | Alkalibacterium_B | -8.99E-01 | 4.85E-05 | 3.31E-03 | 4.24E-02 |
| Bimuria_F              | Alkalibacterium_B | 1.00E+00  | 2.22E-16 | 2.21E-14 | 1.90E-06 |
| Brachymonas_B          | Alkalibacterium_B | 1.00E+00  | 2.22E-16 | 2.21E-14 | 1.90E-06 |
| Bulleidia_B            | Alkalibacterium_B | 8.79E-01  | 1.18E-04 | 7.48E-03 | 6.06E-02 |

|                                     |                   |           |          |          |          |
|-------------------------------------|-------------------|-----------|----------|----------|----------|
| Desemzia_B                          | Alkalibacterium_B | 1.00E+00  | 2.22E-16 | 2.21E-14 | 1.90E-06 |
| Desulfatiferula_B                   | Alkalibacterium_B | 1.00E+00  | 2.22E-16 | 2.21E-14 | 1.90E-06 |
| Holtermannia_F                      | Alkalibacterium_B | 1.00E+00  | 2.22E-16 | 2.21E-14 | 1.90E-06 |
| Leuconostoc_B                       | Alkalibacterium_B | 1.00E+00  | 2.22E-16 | 2.21E-14 | 1.90E-06 |
| Levilinea_B                         | Alkalibacterium_B | -9.17E-01 | 1.75E-05 | 1.30E-03 | 7.84E-03 |
| Parasporobacterium_B                | Alkalibacterium_B | 8.63E-01  | 2.19E-04 | 1.29E-02 | 2.17E-01 |
| Phascolarctobacterium_B             | Alkalibacterium_B | 1.00E+00  | 2.22E-16 | 2.21E-14 | 1.90E-06 |
| Pirellula_B                         | Alkalibacterium_B | 1.00E+00  | 2.22E-16 | 2.21E-14 | 1.90E-06 |
| Rhodopirellula_B                    | Alkalibacterium_B | -8.76E-01 | 1.33E-04 | 8.28E-03 | 7.38E-02 |
| Rudanella_B                         | Alkalibacterium_B | 1.00E+00  | 2.22E-16 | 2.21E-14 | 1.90E-06 |
| Thermonema_B                        | Alkalibacterium_B | 1.00E+00  | 2.22E-16 | 2.21E-14 | 1.90E-06 |
| Tropheryma_B                        | Alkalibacterium_B | 1.00E+00  | 2.22E-16 | 2.21E-14 | 1.90E-06 |
| Unc_Cryptococcus_F                  | Alkalibacterium_B | 1.00E+00  | 2.22E-16 | 2.21E-14 | 1.90E-06 |
| Verminephrobacter_B                 | Alkalibacterium_B | 1.00E+00  | 2.22E-16 | 2.21E-14 | 1.90E-06 |
| Desulfonatronospira_B               | Alkaliflexus_B    | 8.54E-01  | 3.01E-04 | 1.74E-02 | 2.17E-01 |
| Coriobacterium_B                    | Alkaliphilus_B    | 1.00E+00  | 2.22E-16 | 2.21E-14 | 1.90E-06 |
| Desulfotomaculum_B                  | Alkaliphilus_B    | 1.00E+00  | 2.22E-16 | 2.21E-14 | 1.90E-06 |
| Ganoderma_F                         | Alkaliphilus_B    | 1.00E+00  | 2.22E-16 | 2.21E-14 | 1.90E-06 |
| Geosmithia_putterillii_sensu_Pitt_F | Alkaliphilus_B    | -9.16E-01 | 1.90E-05 | 1.39E-03 | 1.77E-02 |
| Johnsonella_B                       | Alkaliphilus_B    | 1.00E+00  | 2.22E-16 | 2.21E-14 | 1.90E-06 |
| Leptonema_B                         | Alkaliphilus_B    | 1.00E+00  | 2.22E-16 | 2.21E-14 | 1.90E-06 |
| Lutimonas_B                         | Alkaliphilus_B    | 1.00E+00  | 2.22E-16 | 2.21E-14 | 1.90E-06 |
| Massilia_B                          | Alkaliphilus_B    | 1.00E+00  | 2.22E-16 | 2.21E-14 | 1.90E-06 |
| Parasegetibacter_B                  | Alkaliphilus_B    | -9.42E-01 | 2.86E-06 | 2.46E-04 | 7.84E-03 |
| Schwartzia_B                        | Alkaliphilus_B    | -9.26E-01 | 9.83E-06 | 7.85E-04 | 7.84E-03 |
| Tepidanaerobacter_B                 | Alkaliphilus_B    | 1.00E+00  | 2.22E-16 | 2.21E-14 | 1.90E-06 |
| Thermoflavimicrobium_B              | Alkaliphilus_B    | 1.00E+00  | 2.22E-16 | 2.21E-14 | 1.90E-06 |
| Unc_Verticillium_F                  | Alkaliphilus_B    | 1.00E+00  | 2.22E-16 | 2.21E-14 | 1.90E-06 |
| Chattonella_F                       | Allisonella_B     | 8.35E-01  | 5.52E-04 | 2.99E-02 | 2.17E-01 |
| Succinivibrio_B                     | Allisonella_B     | 1.00E+00  | 2.22E-16 | 2.21E-14 | 1.90E-06 |

|                        |                 |           |          |          |          |
|------------------------|-----------------|-----------|----------|----------|----------|
| Taphrina_F             | Allisonella_B   | 1.00E+00  | 2.22E-16 | 2.21E-14 | 1.90E-06 |
| Coprococcus_B          | Allobaculum_B   | -8.37E-01 | 5.21E-04 | 2.84E-02 | 2.17E-01 |
| Flexithrix_B           | Allobaculum_B   | -9.08E-01 | 2.96E-05 | 2.09E-03 | 3.13E-02 |
| Gracilibacter_B        | Allobaculum_B   | 8.66E-01  | 1.97E-04 | 1.18E-02 | 1.04E-01 |
| Moryella_B             | Allobaculum_B   | -8.62E-01 | 2.28E-04 | 1.34E-02 | 2.17E-01 |
| Protomyces_F           | Allobaculum_B   | -9.02E-01 | 4.09E-05 | 2.83E-03 | 4.17E-02 |
| Robinsoniella_B        | Allobaculum_B   | -8.22E-01 | 8.06E-04 | 4.12E-02 | 2.68E-01 |
| Papillibacter_B        | Allofustis_B    | -8.50E-01 | 3.41E-04 | 1.95E-02 | 2.17E-01 |
| Anaerofilum_B          | Alloscardovia_B | -9.21E-01 | 1.40E-05 | 1.07E-03 | 7.84E-03 |
| Atopobacter_B          | Alloscardovia_B | 1.00E+00  | 2.22E-16 | 2.21E-14 | 1.90E-06 |
| Bellilinea_B           | Alloscardovia_B | -8.66E-01 | 1.97E-04 | 1.17E-02 | 1.04E-01 |
| Blautia_B              | Alloscardovia_B | -8.83E-01 | 9.96E-05 | 6.43E-03 | 6.06E-02 |
| Catonella_B            | Alloscardovia_B | -8.73E-01 | 1.53E-04 | 9.35E-03 | 1.04E-01 |
| Clostridiisalibacter_B | Alloscardovia_B | 1.00E+00  | 2.22E-16 | 2.21E-14 | 1.90E-06 |
| Desulforegula_B        | Alloscardovia_B | 1.00E+00  | 2.22E-16 | 2.21E-14 | 1.90E-06 |
| Enterorhabdus_B        | Alloscardovia_B | -9.17E-01 | 1.75E-05 | 1.30E-03 | 7.84E-03 |
| Haloglycomyces_B       | Alloscardovia_B | 1.00E+00  | 2.22E-16 | 2.21E-14 | 1.90E-06 |
| Hespellia_B            | Alloscardovia_B | -9.70E-01 | 1.04E-07 | 9.77E-06 | 3.19E-04 |
| Microscilla_B          | Alloscardovia_B | 1.00E+00  | 2.22E-16 | 2.21E-14 | 1.90E-06 |
| Petrimonas_B           | Alloscardovia_B | 1.00E+00  | 2.22E-16 | 2.21E-14 | 1.90E-06 |
| Porphyromonas_B        | Alloscardovia_B | 1.00E+00  | 2.22E-16 | 2.21E-14 | 1.90E-06 |
| Propionibacterium_B    | Alloscardovia_B | 1.00E+00  | 2.22E-16 | 2.21E-14 | 1.90E-06 |
| Pseudomonas_B          | Alloscardovia_B | 1.00E+00  | 2.22E-16 | 2.21E-14 | 1.90E-06 |
| Sanguibacter_B         | Alloscardovia_B | 1.00E+00  | 2.22E-16 | 2.21E-14 | 1.90E-06 |
| Shuttleworthia_B       | Alloscardovia_B | -8.88E-01 | 8.23E-05 | 5.41E-03 | 6.01E-02 |
| Spirochaeta_B          | Alloscardovia_B | 1.00E+00  | 2.22E-16 | 2.21E-14 | 1.90E-06 |
| unclassified_F         | Alloscardovia_B | -8.44E-01 | 4.25E-04 | 2.37E-02 | 2.17E-01 |
| Anaerostipes_B         | Alternaria_F    | 8.13E-01  | 1.01E-03 | 4.96E-02 | 2.68E-01 |
| Anaerosphaera_B        | Ammonifex_B     | 1.00E+00  | 2.22E-16 | 2.21E-14 | 1.90E-06 |
| Atopococcus_B          | Ammonifex_B     | 1.00E+00  | 2.22E-16 | 2.21E-14 | 1.90E-06 |

|                               |                |           |          |          |          |
|-------------------------------|----------------|-----------|----------|----------|----------|
| Bacillus_B                    | Ammonifex_B    | 1.00E+00  | 2.22E-16 | 2.21E-14 | 1.90E-06 |
| Caldilinea_B                  | Ammonifex_B    | 1.00E+00  | 2.22E-16 | 2.21E-14 | 1.90E-06 |
| Denitrobacterium_B            | Ammonifex_B    | 1.00E+00  | 2.22E-16 | 2.21E-14 | 1.90E-06 |
| Desulfocurvus_B               | Ammonifex_B    | 1.00E+00  | 2.22E-16 | 2.21E-14 | 1.90E-06 |
| Desulfoluna_B                 | Ammonifex_B    | 1.00E+00  | 2.22E-16 | 2.21E-14 | 1.90E-06 |
| Erysipelothrix_B              | Ammonifex_B    | -9.29E-01 | 8.34E-06 | 6.77E-04 | 7.84E-03 |
| Filimonas_B                   | Ammonifex_B    | 1.00E+00  | 2.22E-16 | 2.21E-14 | 1.90E-06 |
| Kineococcus_B                 | Ammonifex_B    | 1.00E+00  | 2.22E-16 | 2.21E-14 | 1.90E-06 |
| Nesiotobacter_B               | Ammonifex_B    | 1.00E+00  | 2.22E-16 | 2.21E-14 | 1.90E-06 |
| Nubsella_B                    | Ammonifex_B    | 8.16E-01  | 9.31E-04 | 4.65E-02 | 2.68E-01 |
| Oxalicibacterium_B            | Ammonifex_B    | 1.00E+00  | 2.22E-16 | 2.21E-14 | 1.90E-06 |
| Paracoccus_B                  | Ammonifex_B    | 1.00E+00  | 2.22E-16 | 2.21E-14 | 1.90E-06 |
| Paralactobacillus_B           | Ammonifex_B    | 1.00E+00  | 2.22E-16 | 2.21E-14 | 1.90E-06 |
| Proteiniphilum_B              | Ammonifex_B    | 1.00E+00  | 2.22E-16 | 2.21E-14 | 1.90E-06 |
| Psychrobacter_B               | Ammonifex_B    | 1.00E+00  | 2.22E-16 | 2.21E-14 | 1.90E-06 |
| Sediminibacterium_B           | Ammonifex_B    | 1.00E+00  | 2.22E-16 | 2.21E-14 | 1.90E-06 |
| Selenomonas_B                 | Ammonifex_B    | 1.00E+00  | 2.22E-16 | 2.21E-14 | 1.90E-06 |
| Stenoxybacter_B               | Ammonifex_B    | 1.00E+00  | 2.22E-16 | 2.21E-14 | 1.90E-06 |
| Talaromyces_F                 | Ammonifex_B    | 1.00E+00  | 2.22E-16 | 2.21E-14 | 1.90E-06 |
| unclassified_Pezizomycotina_F | Ammonifex_B    | -1.00E+00 | 2.22E-16 | 2.21E-14 | 1.90E-06 |
| Anaeroplasma_B                | Anaerobacter_B | -8.27E-01 | 6.91E-04 | 3.61E-02 | 2.17E-01 |
| Catellibacterium_B            | Anaerobacter_B | 1.00E+00  | 2.22E-16 | 2.21E-14 | 1.90E-06 |
| Cystofilobasidium_F           | Anaerobacter_B | -9.50E-01 | 1.34E-06 | 1.19E-04 | 2.81E-03 |
| Dechloromonas_B               | Anaerobacter_B | 1.00E+00  | 2.22E-16 | 2.21E-14 | 1.90E-06 |
| Filobasidium_F                | Anaerobacter_B | -9.68E-01 | 1.35E-07 | 1.26E-05 | 5.68E-04 |
| Gemmatimonas_B                | Anaerobacter_B | 1.00E+00  | 2.22E-16 | 2.21E-14 | 1.90E-06 |
| Geosporobacter_B              | Anaerobacter_B | -9.12E-01 | 2.43E-05 | 1.74E-03 | 1.77E-02 |
| Nocardioides_B                | Anaerobacter_B | 1.00E+00  | 2.22E-16 | 2.21E-14 | 1.90E-06 |
| Olivibacter_B                 | Anaerobacter_B | -9.17E-01 | 1.75E-05 | 1.30E-03 | 7.84E-03 |
| Pelomonas_B                   | Anaerobacter_B | 1.00E+00  | 2.22E-16 | 2.21E-14 | 1.90E-06 |

|                           |                |           |          |          |          |
|---------------------------|----------------|-----------|----------|----------|----------|
| Unc_Kirschsteiniothelia_F | Anaerobacter_B | -1.00E+00 | 2.22E-16 | 2.21E-14 | 1.90E-06 |
| Verrucomicrobium_B        | Anaerobacter_B | -8.93E-01 | 6.47E-05 | 4.33E-03 | 6.01E-02 |
| Anaerotruncus_B           | Anaerofilum_B  | 8.30E-01  | 6.36E-04 | 3.37E-02 | 2.17E-01 |
| Atopobacter_B             | Anaerofilum_B  | -9.21E-01 | 1.40E-05 | 1.07E-03 | 7.84E-03 |
| Blautia_B                 | Anaerofilum_B  | 9.08E-01  | 3.00E-05 | 2.12E-03 | 3.13E-02 |
| Catonella_B               | Anaerofilum_B  | 9.17E-01  | 1.82E-05 | 1.34E-03 | 7.84E-03 |
| Clostridiisalibacter_B    | Anaerofilum_B  | -9.21E-01 | 1.40E-05 | 1.07E-03 | 7.84E-03 |
| Desulforegula_B           | Anaerofilum_B  | -9.21E-01 | 1.40E-05 | 1.07E-03 | 7.84E-03 |
| Enterorhabdus_B           | Anaerofilum_B  | 9.06E-01  | 3.42E-05 | 2.39E-03 | 4.17E-02 |
| Haloglycomyces_B          | Anaerofilum_B  | -9.21E-01 | 1.40E-05 | 1.07E-03 | 7.84E-03 |
| Hespellia_B               | Anaerofilum_B  | 9.06E-01  | 3.36E-05 | 2.35E-03 | 4.17E-02 |
| Lactonifactor_B           | Anaerofilum_B  | 8.61E-01  | 2.40E-04 | 1.41E-02 | 2.17E-01 |
| Microscilla_B             | Anaerofilum_B  | -9.21E-01 | 1.40E-05 | 1.07E-03 | 7.84E-03 |
| Petrimonas_B              | Anaerofilum_B  | -9.21E-01 | 1.40E-05 | 1.07E-03 | 7.84E-03 |
| Porphyromonas_B           | Anaerofilum_B  | -9.21E-01 | 1.40E-05 | 1.07E-03 | 7.84E-03 |
| Propionibacterium_B       | Anaerofilum_B  | -9.21E-01 | 1.40E-05 | 1.07E-03 | 7.84E-03 |
| Pseudomonas_B             | Anaerofilum_B  | -9.21E-01 | 1.40E-05 | 1.07E-03 | 7.84E-03 |
| Sanguibacter_B            | Anaerofilum_B  | -9.21E-01 | 1.40E-05 | 1.07E-03 | 7.84E-03 |
| Sharpea_B                 | Anaerofilum_B  | 8.83E-01  | 1.02E-04 | 6.57E-03 | 6.06E-02 |
| Spirochaeta_B             | Anaerofilum_B  | -9.21E-01 | 1.40E-05 | 1.07E-03 | 7.84E-03 |
| Anaerovorax_B             | Anaeroglobus_B | 8.66E-01  | 2.00E-04 | 1.19E-02 | 1.04E-01 |
| Kiloniella_B              | Anaeroglobus_B | -9.72E-01 | 6.40E-08 | 6.11E-06 | 2.87E-04 |
| Oribacterium_B            | Anaeroglobus_B | 8.52E-01  | 3.26E-04 | 1.87E-02 | 2.17E-01 |
| Pelospora_B               | Anaeroglobus_B | 9.37E-01  | 4.57E-06 | 3.86E-04 | 7.84E-03 |
| Sporobacterium_B          | Anaeroglobus_B | 9.70E-01  | 9.66E-08 | 9.12E-06 | 2.87E-04 |
| Stenotrophomonas_B        | Anaeroglobus_B | -9.72E-01 | 6.40E-08 | 6.11E-06 | 2.87E-04 |
| Natantispora_F            | Anaerophaga_B  | 8.17E-01  | 9.29E-04 | 4.64E-02 | 2.68E-01 |
| Tepidimicrobium_B         | Anaerophaga_B  | 8.17E-01  | 9.29E-04 | 4.64E-02 | 2.68E-01 |
| Thermotalea_B             | Anaerophaga_B  | 8.68E-01  | 1.82E-04 | 1.09E-02 | 1.04E-01 |
| Aquiflexum_B              | Anaeroplasma_B | 8.30E-01  | 6.35E-04 | 3.36E-02 | 2.17E-01 |

|                               |                     |           |          |          |          |
|-------------------------------|---------------------|-----------|----------|----------|----------|
| Catellibacterium_B            | Anaeroplasma_B      | -8.27E-01 | 6.91E-04 | 3.61E-02 | 2.17E-01 |
| Cystofilobasidium_F           | Anaeroplasma_B      | 8.17E-01  | 9.14E-04 | 4.58E-02 | 2.68E-01 |
| Dechloromonas_B               | Anaeroplasma_B      | -8.27E-01 | 6.91E-04 | 3.61E-02 | 2.17E-01 |
| Gemmatimonas_B                | Anaeroplasma_B      | -8.27E-01 | 6.91E-04 | 3.61E-02 | 2.17E-01 |
| Nocardioides_B                | Anaeroplasma_B      | -8.27E-01 | 6.91E-04 | 3.61E-02 | 2.17E-01 |
| Olivibacter_B                 | Anaeroplasma_B      | 8.68E-01  | 1.86E-04 | 1.12E-02 | 1.04E-01 |
| Pelomonas_B                   | Anaeroplasma_B      | -8.27E-01 | 6.91E-04 | 3.61E-02 | 2.17E-01 |
| Unc_Kirschsteiniotelia_F      | Anaeroplasma_B      | 8.27E-01  | 6.91E-04 | 3.61E-02 | 2.17E-01 |
| Atopococcus_B                 | Anaerosphaera_B     | 1.00E+00  | 2.22E-16 | 2.21E-14 | 1.90E-06 |
| Bacillus_B                    | Anaerosphaera_B     | 1.00E+00  | 2.22E-16 | 2.21E-14 | 1.90E-06 |
| Caldilinea_B                  | Anaerosphaera_B     | 1.00E+00  | 2.22E-16 | 2.21E-14 | 1.90E-06 |
| Denitrobacterium_B            | Anaerosphaera_B     | 1.00E+00  | 2.22E-16 | 2.21E-14 | 1.90E-06 |
| Desulfocurvus_B               | Anaerosphaera_B     | 1.00E+00  | 2.22E-16 | 2.21E-14 | 1.90E-06 |
| Desulfoluna_B                 | Anaerosphaera_B     | 1.00E+00  | 2.22E-16 | 2.21E-14 | 1.90E-06 |
| Erysipelothrix_B              | Anaerosphaera_B     | -9.29E-01 | 8.34E-06 | 6.77E-04 | 7.84E-03 |
| Filimonas_B                   | Anaerosphaera_B     | 1.00E+00  | 2.22E-16 | 2.21E-14 | 1.90E-06 |
| Kineococcus_B                 | Anaerosphaera_B     | 1.00E+00  | 2.22E-16 | 2.21E-14 | 1.90E-06 |
| Nesiotobacter_B               | Anaerosphaera_B     | 1.00E+00  | 2.22E-16 | 2.21E-14 | 1.90E-06 |
| Nubsella_B                    | Anaerosphaera_B     | 8.16E-01  | 9.31E-04 | 4.65E-02 | 2.68E-01 |
| Oxalicibacterium_B            | Anaerosphaera_B     | 1.00E+00  | 2.22E-16 | 2.21E-14 | 1.90E-06 |
| Paracoccus_B                  | Anaerosphaera_B     | 1.00E+00  | 2.22E-16 | 2.21E-14 | 1.90E-06 |
| Paralactobacillus_B           | Anaerosphaera_B     | 1.00E+00  | 2.22E-16 | 2.21E-14 | 1.90E-06 |
| Proteiniphilum_B              | Anaerosphaera_B     | 1.00E+00  | 2.22E-16 | 2.21E-14 | 1.90E-06 |
| Psychrobacter_B               | Anaerosphaera_B     | 1.00E+00  | 2.22E-16 | 2.21E-14 | 1.90E-06 |
| Sediminibacterium_B           | Anaerosphaera_B     | 1.00E+00  | 2.22E-16 | 2.21E-14 | 1.90E-06 |
| Selenomonas_B                 | Anaerosphaera_B     | 1.00E+00  | 2.22E-16 | 2.21E-14 | 1.90E-06 |
| Stenoxybacter_B               | Anaerosphaera_B     | 1.00E+00  | 2.22E-16 | 2.21E-14 | 1.90E-06 |
| Talaromyces_F                 | Anaerosphaera_B     | 1.00E+00  | 2.22E-16 | 2.21E-14 | 1.90E-06 |
| unclassified_Pezizomycotina_F | Anaerosphaera_B     | -1.00E+00 | 2.22E-16 | 2.21E-14 | 1.90E-06 |
| Arthrobacter_B                | Anaerosporobacter_B | -9.13E-01 | 2.26E-05 | 1.63E-03 | 1.77E-02 |

|                        |                     |           |          |          |          |
|------------------------|---------------------|-----------|----------|----------|----------|
| Clavibacter_B          | Anaerosporobacter_B | -9.13E-01 | 2.26E-05 | 1.63E-03 | 1.77E-02 |
| Caminiella_B           | Anaerostipes_B      | 8.24E-01  | 7.63E-04 | 3.93E-02 | 2.68E-01 |
| Coprococcus_B          | Anaerostipes_B      | 8.50E-01  | 3.50E-04 | 1.99E-02 | 2.17E-01 |
| Roseburia_B            | Anaerostipes_B      | 9.16E-01  | 1.86E-05 | 1.36E-03 | 7.84E-03 |
| Catonella_B            | Anaerotruncus_B     | 8.79E-01  | 1.17E-04 | 7.42E-03 | 6.06E-02 |
| Enterorhabdus_B        | Anaerotruncus_B     | 9.01E-01  | 4.37E-05 | 3.01E-03 | 4.17E-02 |
| Fastidiosipila_B       | Anaerotruncus_B     | 9.65E-01  | 2.15E-07 | 2.00E-05 | 2.21E-03 |
| Oscillibacter_B        | Anaerotruncus_B     | 8.25E-01  | 7.42E-04 | 3.84E-02 | 2.68E-01 |
| Solobacterium_B        | Anaerotruncus_B     | 8.77E-01  | 1.32E-04 | 8.22E-03 | 6.06E-02 |
| Xylanibacter_B         | Anaerotruncus_B     | 8.49E-01  | 3.58E-04 | 2.03E-02 | 2.17E-01 |
| Sandaracinobacter_B    | Anaerovibrio_B      | 8.31E-01  | 6.29E-04 | 3.34E-02 | 2.17E-01 |
| Kiloniella_B           | Anaerovorax_B       | -8.85E-01 | 9.21E-05 | 5.99E-03 | 6.01E-02 |
| Parasporobacterium_B   | Anaerovorax_B       | 8.34E-01  | 5.75E-04 | 3.09E-02 | 2.17E-01 |
| Pelospora_B            | Anaerovorax_B       | 8.85E-01  | 9.16E-05 | 5.96E-03 | 6.01E-02 |
| Sporobacterium_B       | Anaerovorax_B       | 9.12E-01  | 2.42E-05 | 1.73E-03 | 1.77E-02 |
| Stenotrophomonas_B     | Anaerovorax_B       | -8.85E-01 | 9.21E-05 | 5.99E-03 | 6.01E-02 |
| Limibacter_B           | Anoxynatronum_B     | 8.26E-01  | 7.19E-04 | 3.74E-02 | 2.68E-01 |
| Clavibacter_B          | Arthrobacter_B      | 1.00E+00  | 2.22E-16 | 2.21E-14 | 1.90E-06 |
| Centipeda_B            | Asaccharobacter_B   | 8.36E-01  | 5.31E-04 | 2.89E-02 | 2.17E-01 |
| Dorea_B                | Asaccharobacter_B   | 9.90E-01  | 3.42E-10 | 3.36E-08 | 7.72E-06 |
| Treponema_B            | Ascosalsum_F        | -9.43E-01 | 2.61E-06 | 2.25E-04 | 4.74E-03 |
| Echinicola_B           | Asteroleplasma_B    | 1.00E+00  | 2.22E-16 | 2.21E-14 | 1.90E-06 |
| Fluviicola_B           | Asteroleplasma_B    | 8.56E-01  | 2.86E-04 | 1.65E-02 | 2.17E-01 |
| Jonquetella_B          | Asteroleplasma_B    | -8.40E-01 | 4.73E-04 | 2.61E-02 | 2.17E-01 |
| Lutaonella_B           | Asteroleplasma_B    | 8.91E-01  | 7.15E-05 | 4.76E-03 | 6.01E-02 |
| Bellilinea_B           | Atopobacter_B       | -8.66E-01 | 1.97E-04 | 1.17E-02 | 1.04E-01 |
| Blautia_B              | Atopobacter_B       | -8.83E-01 | 9.96E-05 | 6.43E-03 | 6.06E-02 |
| Catonella_B            | Atopobacter_B       | -8.73E-01 | 1.53E-04 | 9.35E-03 | 1.04E-01 |
| Clostridiisalibacter_B | Atopobacter_B       | 1.00E+00  | 2.22E-16 | 2.21E-14 | 1.90E-06 |
| Desulforegula_B        | Atopobacter_B       | 1.00E+00  | 2.22E-16 | 2.21E-14 | 1.90E-06 |

|                       |               |           |          |          |          |
|-----------------------|---------------|-----------|----------|----------|----------|
| Enterorhabdus_B       | Atopobacter_B | -9.17E-01 | 1.75E-05 | 1.30E-03 | 7.84E-03 |
| Haloglycomyces_B      | Atopobacter_B | 1.00E+00  | 2.22E-16 | 2.21E-14 | 1.90E-06 |
| Hespellia_B           | Atopobacter_B | -9.70E-01 | 1.04E-07 | 9.77E-06 | 3.19E-04 |
| Microscilla_B         | Atopobacter_B | 1.00E+00  | 2.22E-16 | 2.21E-14 | 1.90E-06 |
| Petrimonas_B          | Atopobacter_B | 1.00E+00  | 2.22E-16 | 2.21E-14 | 1.90E-06 |
| Porphyromonas_B       | Atopobacter_B | 1.00E+00  | 2.22E-16 | 2.21E-14 | 1.90E-06 |
| Propionibacterium_B   | Atopobacter_B | 1.00E+00  | 2.22E-16 | 2.21E-14 | 1.90E-06 |
| Pseudomonas_B         | Atopobacter_B | 1.00E+00  | 2.22E-16 | 2.21E-14 | 1.90E-06 |
| Sanguibacter_B        | Atopobacter_B | 1.00E+00  | 2.22E-16 | 2.21E-14 | 1.90E-06 |
| Shuttleworthia_B      | Atopobacter_B | -8.88E-01 | 8.23E-05 | 5.41E-03 | 6.01E-02 |
| Spirochaeta_B         | Atopobacter_B | 1.00E+00  | 2.22E-16 | 2.21E-14 | 1.90E-06 |
| unclassified_F        | Atopobacter_B | -8.44E-01 | 4.25E-04 | 2.37E-02 | 2.17E-01 |
| Brevibacterium_B      | Atopobium_B   | -8.85E-01 | 9.16E-05 | 5.96E-03 | 6.01E-02 |
| Desulfonatronospira_B | Atopobium_B   | 8.38E-01  | 5.10E-04 | 2.79E-02 | 2.17E-01 |
| Haliscomenobacter_B   | Atopobium_B   | -8.28E-01 | 6.78E-04 | 3.55E-02 | 2.17E-01 |
| Sporobacter_B         | Atopobium_B   | 9.40E-01  | 3.49E-06 | 2.98E-04 | 7.84E-03 |
| Bacillus_B            | Atopococcus_B | 1.00E+00  | 2.22E-16 | 2.21E-14 | 1.90E-06 |
| Caldilinea_B          | Atopococcus_B | 1.00E+00  | 2.22E-16 | 2.21E-14 | 1.90E-06 |
| Denitrobacterium_B    | Atopococcus_B | 1.00E+00  | 2.22E-16 | 2.21E-14 | 1.90E-06 |
| Desulfocurvus_B       | Atopococcus_B | 1.00E+00  | 2.22E-16 | 2.21E-14 | 1.90E-06 |
| Desulfoluna_B         | Atopococcus_B | 1.00E+00  | 2.22E-16 | 2.21E-14 | 1.90E-06 |
| Erysipelothrix_B      | Atopococcus_B | -9.29E-01 | 8.34E-06 | 6.77E-04 | 7.84E-03 |
| Filimonas_B           | Atopococcus_B | 1.00E+00  | 2.22E-16 | 2.21E-14 | 1.90E-06 |
| Kineococcus_B         | Atopococcus_B | 1.00E+00  | 2.22E-16 | 2.21E-14 | 1.90E-06 |
| Nesiotobacter_B       | Atopococcus_B | 1.00E+00  | 2.22E-16 | 2.21E-14 | 1.90E-06 |
| Nubsella_B            | Atopococcus_B | 8.16E-01  | 9.31E-04 | 4.65E-02 | 2.68E-01 |
| Oxalicibacterium_B    | Atopococcus_B | 1.00E+00  | 2.22E-16 | 2.21E-14 | 1.90E-06 |
| Paracoccus_B          | Atopococcus_B | 1.00E+00  | 2.22E-16 | 2.21E-14 | 1.90E-06 |
| Paralactobacillus_B   | Atopococcus_B | 1.00E+00  | 2.22E-16 | 2.21E-14 | 1.90E-06 |
| Proteiniphilum_B      | Atopococcus_B | 1.00E+00  | 2.22E-16 | 2.21E-14 | 1.90E-06 |

|                               |                 |           |          |          |          |
|-------------------------------|-----------------|-----------|----------|----------|----------|
| Psychrobacter_B               | Atopococcus_B   | 1.00E+00  | 2.22E-16 | 2.21E-14 | 1.90E-06 |
| Sediminibacterium_B           | Atopococcus_B   | 1.00E+00  | 2.22E-16 | 2.21E-14 | 1.90E-06 |
| Selenomonas_B                 | Atopococcus_B   | 1.00E+00  | 2.22E-16 | 2.21E-14 | 1.90E-06 |
| Stenoxybacter_B               | Atopococcus_B   | 1.00E+00  | 2.22E-16 | 2.21E-14 | 1.90E-06 |
| Talaromyces_F                 | Atopococcus_B   | 1.00E+00  | 2.22E-16 | 2.21E-14 | 1.90E-06 |
| unclassified_Pezizomycotina_F | Atopococcus_B   | -1.00E+00 | 2.22E-16 | 2.21E-14 | 1.90E-06 |
| Ornithobacterium_B            | Atopostipes_B   | -8.18E-01 | 8.99E-04 | 4.52E-02 | 2.68E-01 |
| Caldilinea_B                  | Bacillus_B      | 1.00E+00  | 2.22E-16 | 2.21E-14 | 1.90E-06 |
| Denitrobacterium_B            | Bacillus_B      | 1.00E+00  | 2.22E-16 | 2.21E-14 | 1.90E-06 |
| Desulfocurvus_B               | Bacillus_B      | 1.00E+00  | 2.22E-16 | 2.21E-14 | 1.90E-06 |
| Desulfoluna_B                 | Bacillus_B      | 1.00E+00  | 2.22E-16 | 2.21E-14 | 1.90E-06 |
| Erysipelothrix_B              | Bacillus_B      | -9.29E-01 | 8.34E-06 | 6.77E-04 | 7.84E-03 |
| Filimonas_B                   | Bacillus_B      | 1.00E+00  | 2.22E-16 | 2.21E-14 | 1.90E-06 |
| Kineococcus_B                 | Bacillus_B      | 1.00E+00  | 2.22E-16 | 2.21E-14 | 1.90E-06 |
| Nesiotobacter_B               | Bacillus_B      | 1.00E+00  | 2.22E-16 | 2.21E-14 | 1.90E-06 |
| Nubsella_B                    | Bacillus_B      | 8.16E-01  | 9.31E-04 | 4.65E-02 | 2.68E-01 |
| Oxalicibacterium_B            | Bacillus_B      | 1.00E+00  | 2.22E-16 | 2.21E-14 | 1.90E-06 |
| Paracoccus_B                  | Bacillus_B      | 1.00E+00  | 2.22E-16 | 2.21E-14 | 1.90E-06 |
| Paralactobacillus_B           | Bacillus_B      | 1.00E+00  | 2.22E-16 | 2.21E-14 | 1.90E-06 |
| Proteiniphilum_B              | Bacillus_B      | 1.00E+00  | 2.22E-16 | 2.21E-14 | 1.90E-06 |
| Psychrobacter_B               | Bacillus_B      | 1.00E+00  | 2.22E-16 | 2.21E-14 | 1.90E-06 |
| Sediminibacterium_B           | Bacillus_B      | 1.00E+00  | 2.22E-16 | 2.21E-14 | 1.90E-06 |
| Selenomonas_B                 | Bacillus_B      | 1.00E+00  | 2.22E-16 | 2.21E-14 | 1.90E-06 |
| Stenoxybacter_B               | Bacillus_B      | 1.00E+00  | 2.22E-16 | 2.21E-14 | 1.90E-06 |
| Talaromyces_F                 | Bacillus_B      | 1.00E+00  | 2.22E-16 | 2.21E-14 | 1.90E-06 |
| unclassified_Pezizomycotina_F | Bacillus_B      | -1.00E+00 | 2.22E-16 | 2.21E-14 | 1.90E-06 |
| Phocaeicola_B                 | Bacteroides_B   | -8.25E-01 | 7.39E-04 | 3.82E-02 | 2.68E-01 |
| Sporacetigenium_B             | Bacteroides_B   | -8.87E-01 | 8.37E-05 | 5.49E-03 | 6.01E-02 |
| Bimuria_F                     | Bavariicoccus_B | -8.99E-01 | 4.85E-05 | 3.31E-03 | 4.24E-02 |
| Brachymonas_B                 | Bavariicoccus_B | -8.99E-01 | 4.85E-05 | 3.31E-03 | 4.24E-02 |

|                         |                 |           |          |          |          |
|-------------------------|-----------------|-----------|----------|----------|----------|
| Desemzia_B              | Bavariicoccus_B | -8.99E-01 | 4.85E-05 | 3.31E-03 | 4.24E-02 |
| Desulfatiferula_B       | Bavariicoccus_B | -8.99E-01 | 4.85E-05 | 3.31E-03 | 4.24E-02 |
| Holtermannia_F          | Bavariicoccus_B | -8.99E-01 | 4.85E-05 | 3.31E-03 | 4.24E-02 |
| Leuconostoc_B           | Bavariicoccus_B | -8.99E-01 | 4.85E-05 | 3.31E-03 | 4.24E-02 |
| Phascolarctobacterium_B | Bavariicoccus_B | -8.99E-01 | 4.85E-05 | 3.31E-03 | 4.24E-02 |
| Pirellula_B             | Bavariicoccus_B | -8.99E-01 | 4.85E-05 | 3.31E-03 | 4.24E-02 |
| Rhodopirellula_B        | Bavariicoccus_B | 8.50E-01  | 3.45E-04 | 1.97E-02 | 2.17E-01 |
| Rudanella_B             | Bavariicoccus_B | -8.99E-01 | 4.85E-05 | 3.31E-03 | 4.24E-02 |
| Thermonema_B            | Bavariicoccus_B | -8.99E-01 | 4.85E-05 | 3.31E-03 | 4.24E-02 |
| Tropheryma_B            | Bavariicoccus_B | -8.99E-01 | 4.85E-05 | 3.31E-03 | 4.24E-02 |
| Unc_Cryptococcus_F      | Bavariicoccus_B | -8.99E-01 | 4.85E-05 | 3.31E-03 | 4.24E-02 |
| Verminephrobacter_B     | Bavariicoccus_B | -8.99E-01 | 4.85E-05 | 3.31E-03 | 4.24E-02 |
| Kosmotoga_B             | Bdellovibrio_B  | 1.00E+00  | 2.22E-16 | 2.21E-14 | 1.90E-06 |
| Shuttleworthia_B        | Bdellovibrio_B  | -8.48E-01 | 3.74E-04 | 2.12E-02 | 2.17E-01 |
| Clostridiisalibacter_B  | Bellilinea_B    | -8.66E-01 | 1.97E-04 | 1.17E-02 | 1.04E-01 |
| Desulforegula_B         | Bellilinea_B    | -8.66E-01 | 1.97E-04 | 1.17E-02 | 1.04E-01 |
| Eubacterium_B           | Bellilinea_B    | 8.38E-01  | 5.03E-04 | 2.75E-02 | 2.17E-01 |
| Filobacillus_B          | Bellilinea_B    | -8.18E-01 | 9.00E-04 | 4.52E-02 | 2.68E-01 |
| Haloglycomyces_B        | Bellilinea_B    | -8.66E-01 | 1.97E-04 | 1.17E-02 | 1.04E-01 |
| Hespellia_B             | Bellilinea_B    | 8.64E-01  | 2.15E-04 | 1.27E-02 | 1.04E-01 |
| Microscilla_B           | Bellilinea_B    | -8.66E-01 | 1.97E-04 | 1.17E-02 | 1.04E-01 |
| Petrimonas_B            | Bellilinea_B    | -8.66E-01 | 1.97E-04 | 1.17E-02 | 1.04E-01 |
| Porphyromonas_B         | Bellilinea_B    | -8.66E-01 | 1.97E-04 | 1.17E-02 | 1.04E-01 |
| Propionibacterium_B     | Bellilinea_B    | -8.66E-01 | 1.97E-04 | 1.17E-02 | 1.04E-01 |
| Pseudomonas_B           | Bellilinea_B    | -8.66E-01 | 1.97E-04 | 1.17E-02 | 1.04E-01 |
| Sanguibacter_B          | Bellilinea_B    | -8.66E-01 | 1.97E-04 | 1.17E-02 | 1.04E-01 |
| Shuttleworthia_B        | Bellilinea_B    | 9.19E-01  | 1.61E-05 | 1.21E-03 | 7.84E-03 |
| Spirochaeta_B           | Bellilinea_B    | -8.66E-01 | 1.97E-04 | 1.17E-02 | 1.04E-01 |
| unclassified_F          | Bellilinea_B    | 8.84E-01  | 9.70E-05 | 6.27E-03 | 6.01E-02 |
| Gordonibacter_B         | Bibersteinia_B  | -8.23E-01 | 7.89E-04 | 4.04E-02 | 2.68E-01 |

|                         |                |           |          |          |          |
|-------------------------|----------------|-----------|----------|----------|----------|
| Pedobacter_B            | Bibersteinia_B | 9.91E-01  | 1.88E-10 | 1.85E-08 | 5.47E-06 |
| Brachymonas_B           | Bimuria_F      | 1.00E+00  | 2.22E-16 | 2.21E-14 | 1.90E-06 |
| Bulleidia_B             | Bimuria_F      | 8.79E-01  | 1.18E-04 | 7.48E-03 | 6.06E-02 |
| Desemzia_B              | Bimuria_F      | 1.00E+00  | 2.22E-16 | 2.21E-14 | 1.90E-06 |
| Desulfatiferula_B       | Bimuria_F      | 1.00E+00  | 2.22E-16 | 2.21E-14 | 1.90E-06 |
| Holtermannia_F          | Bimuria_F      | 1.00E+00  | 2.22E-16 | 2.21E-14 | 1.90E-06 |
| Leuconostoc_B           | Bimuria_F      | 1.00E+00  | 2.22E-16 | 2.21E-14 | 1.90E-06 |
| Levilinea_B             | Bimuria_F      | -9.17E-01 | 1.75E-05 | 1.30E-03 | 7.84E-03 |
| Parasporobacterium_B    | Bimuria_F      | 8.63E-01  | 2.19E-04 | 1.29E-02 | 2.17E-01 |
| Phascolarctobacterium_B | Bimuria_F      | 1.00E+00  | 2.22E-16 | 2.21E-14 | 1.90E-06 |
| Pirellula_B             | Bimuria_F      | 1.00E+00  | 2.22E-16 | 2.21E-14 | 1.90E-06 |
| Rhodopirellula_B        | Bimuria_F      | -8.76E-01 | 1.33E-04 | 8.28E-03 | 7.38E-02 |
| Rudanella_B             | Bimuria_F      | 1.00E+00  | 2.22E-16 | 2.21E-14 | 1.90E-06 |
| Thermonema_B            | Bimuria_F      | 1.00E+00  | 2.22E-16 | 2.21E-14 | 1.90E-06 |
| Tropheryma_B            | Bimuria_F      | 1.00E+00  | 2.22E-16 | 2.21E-14 | 1.90E-06 |
| Unc_Cryptococcus_F      | Bimuria_F      | 1.00E+00  | 2.22E-16 | 2.21E-14 | 1.90E-06 |
| Verminephrobacter_B     | Bimuria_F      | 1.00E+00  | 2.22E-16 | 2.21E-14 | 1.90E-06 |
| Catenibacterium_B       | Blautia_B      | -8.40E-01 | 4.79E-04 | 2.64E-02 | 2.17E-01 |
| Catonella_B             | Blautia_B      | 9.00E-01  | 4.70E-05 | 3.22E-03 | 4.17E-02 |
| Clostridiisalibacter_B  | Blautia_B      | -8.83E-01 | 9.96E-05 | 6.43E-03 | 6.06E-02 |
| Desulforegula_B         | Blautia_B      | -8.83E-01 | 9.96E-05 | 6.43E-03 | 6.06E-02 |
| Enterorhabdus_B         | Blautia_B      | 9.52E-01  | 1.12E-06 | 1.00E-04 | 2.81E-03 |
| Haloglycomyces_B        | Blautia_B      | -8.83E-01 | 9.96E-05 | 6.43E-03 | 6.06E-02 |
| Hespellia_B             | Blautia_B      | 9.04E-01  | 3.83E-05 | 2.66E-03 | 4.17E-02 |
| Microscilla_B           | Blautia_B      | -8.83E-01 | 9.96E-05 | 6.43E-03 | 6.06E-02 |
| Petrimonas_B            | Blautia_B      | -8.83E-01 | 9.96E-05 | 6.43E-03 | 6.06E-02 |
| Porphyromonas_B         | Blautia_B      | -8.83E-01 | 9.96E-05 | 6.43E-03 | 6.06E-02 |
| Propionibacterium_B     | Blautia_B      | -8.83E-01 | 9.96E-05 | 6.43E-03 | 6.06E-02 |
| Pseudomonas_B           | Blautia_B      | -8.83E-01 | 9.96E-05 | 6.43E-03 | 6.06E-02 |
| Robinsoniella_B         | Blautia_B      | 8.71E-01  | 1.64E-04 | 9.98E-03 | 1.04E-01 |

|                         |                   |           |          |          |          |
|-------------------------|-------------------|-----------|----------|----------|----------|
| Sanguibacter_B          | Blautia_B         | -8.83E-01 | 9.96E-05 | 6.43E-03 | 6.06E-02 |
| Shuttleworthia_B        | Blautia_B         | 8.97E-01  | 5.33E-05 | 3.62E-03 | 6.01E-02 |
| Spirochaeta_B           | Blautia_B         | -8.83E-01 | 9.96E-05 | 6.43E-03 | 6.06E-02 |
| Syntrophococcus_B       | Blautia_B         | 9.00E-01  | 4.56E-05 | 3.13E-03 | 4.17E-02 |
| Turcibacter_B           | Blautia_B         | -8.82E-01 | 1.04E-04 | 6.65E-03 | 6.06E-02 |
| Melissococcus_B         | Brachybacterium_B | -9.72E-01 | 6.40E-08 | 6.11E-06 | 2.87E-04 |
| Bulleidia_B             | Brachymonas_B     | 8.79E-01  | 1.18E-04 | 7.48E-03 | 6.06E-02 |
| Desemzia_B              | Brachymonas_B     | 1.00E+00  | 2.22E-16 | 2.21E-14 | 1.90E-06 |
| Desulfatiferula_B       | Brachymonas_B     | 1.00E+00  | 2.22E-16 | 2.21E-14 | 1.90E-06 |
| Holtermannia_F          | Brachymonas_B     | 1.00E+00  | 2.22E-16 | 2.21E-14 | 1.90E-06 |
| Leuconostoc_B           | Brachymonas_B     | 1.00E+00  | 2.22E-16 | 2.21E-14 | 1.90E-06 |
| Levilinea_B             | Brachymonas_B     | -9.17E-01 | 1.75E-05 | 1.30E-03 | 7.84E-03 |
| Parasporobacterium_B    | Brachymonas_B     | 8.63E-01  | 2.19E-04 | 1.29E-02 | 2.17E-01 |
| Phascolarctobacterium_B | Brachymonas_B     | 1.00E+00  | 2.22E-16 | 2.21E-14 | 1.90E-06 |
| Pirellula_B             | Brachymonas_B     | 1.00E+00  | 2.22E-16 | 2.21E-14 | 1.90E-06 |
| Rhodopirellula_B        | Brachymonas_B     | -8.76E-01 | 1.33E-04 | 8.28E-03 | 7.38E-02 |
| Rudanella_B             | Brachymonas_B     | 1.00E+00  | 2.22E-16 | 2.21E-14 | 1.90E-06 |
| Thermonema_B            | Brachymonas_B     | 1.00E+00  | 2.22E-16 | 2.21E-14 | 1.90E-06 |
| Tropheryma_B            | Brachymonas_B     | 1.00E+00  | 2.22E-16 | 2.21E-14 | 1.90E-06 |
| Unc_Cryptococcus_F      | Brachymonas_B     | 1.00E+00  | 2.22E-16 | 2.21E-14 | 1.90E-06 |
| Verminephrobacter_B     | Brachymonas_B     | 1.00E+00  | 2.22E-16 | 2.21E-14 | 1.90E-06 |
| Desulfonatronospira_B   | Brevibacterium_B  | -9.89E-01 | 4.51E-10 | 4.42E-08 | 2.81E-05 |
| Cloacibacillus_B        | Bulgaria_F        | 1.00E+00  | 2.22E-16 | 2.21E-14 | 1.90E-06 |
| Conexibacter_B          | Bulgaria_F        | 1.00E+00  | 2.22E-16 | 2.21E-14 | 1.90E-06 |
| Dolosigranulum_B        | Bulgaria_F        | 1.00E+00  | 2.22E-16 | 2.21E-14 | 1.90E-06 |
| Effluviibacter_B        | Bulgaria_F        | -8.27E-01 | 6.99E-04 | 3.65E-02 | 2.68E-01 |
| Kordia_B                | Bulgaria_F        | 1.00E+00  | 2.22E-16 | 2.21E-14 | 1.90E-06 |
| Labeledella_B           | Bulgaria_F        | 1.00E+00  | 2.22E-16 | 2.21E-14 | 1.90E-06 |
| Nicoletella_B           | Bulgaria_F        | 1.00E+00  | 2.22E-16 | 2.21E-14 | 1.90E-06 |
| Okibacterium_B          | Bulgaria_F        | 1.00E+00  | 2.22E-16 | 2.21E-14 | 1.90E-06 |

|                         |                  |           |          |          |          |
|-------------------------|------------------|-----------|----------|----------|----------|
| Olsenella_B             | Bulgaria_F       | -9.47E-01 | 1.78E-06 | 1.57E-04 | 2.81E-03 |
| Parascardovia_B         | Bulgaria_F       | 1.00E+00  | 2.22E-16 | 2.21E-14 | 1.90E-06 |
| Rhodovarius_B           | Bulgaria_F       | 1.00E+00  | 2.22E-16 | 2.21E-14 | 1.90E-06 |
| Slackia_B               | Bulgaria_F       | -9.07E-01 | 3.20E-05 | 2.25E-03 | 4.17E-02 |
| Thermovenabulum_B       | Bulgaria_F       | 1.00E+00  | 2.22E-16 | 2.21E-14 | 1.90E-06 |
| Desemzia_B              | Bulleidia_B      | 8.79E-01  | 1.18E-04 | 7.48E-03 | 6.06E-02 |
| Desulfatiferula_B       | Bulleidia_B      | 8.79E-01  | 1.18E-04 | 7.48E-03 | 6.06E-02 |
| Holtermannia_F          | Bulleidia_B      | 8.79E-01  | 1.18E-04 | 7.48E-03 | 6.06E-02 |
| Leuconostoc_B           | Bulleidia_B      | 8.79E-01  | 1.18E-04 | 7.48E-03 | 6.06E-02 |
| Levilinea_B             | Bulleidia_B      | -8.65E-01 | 2.08E-04 | 1.23E-02 | 1.04E-01 |
| Natronobacillus_B       | Bulleidia_B      | 8.32E-01  | 6.03E-04 | 3.22E-02 | 2.17E-01 |
| Phascolarctobacterium_B | Bulleidia_B      | 8.79E-01  | 1.18E-04 | 7.48E-03 | 6.06E-02 |
| Pirellula_B             | Bulleidia_B      | 8.79E-01  | 1.18E-04 | 7.48E-03 | 6.06E-02 |
| Rudanella_B             | Bulleidia_B      | 8.79E-01  | 1.18E-04 | 7.48E-03 | 6.06E-02 |
| Thermonema_B            | Bulleidia_B      | 8.79E-01  | 1.18E-04 | 7.48E-03 | 6.06E-02 |
| Tropheryma_B            | Bulleidia_B      | 8.79E-01  | 1.18E-04 | 7.48E-03 | 6.06E-02 |
| Unc_Cryptococcus_F      | Bulleidia_B      | 8.79E-01  | 1.18E-04 | 7.48E-03 | 6.06E-02 |
| Verminephrobacter_B     | Bulleidia_B      | 8.79E-01  | 1.18E-04 | 7.48E-03 | 6.06E-02 |
| Fabibacter_B            | Butyricicoccus_B | -8.43E-01 | 4.32E-04 | 2.41E-02 | 2.17E-01 |
| Proteiniborus_B         | Butyricicoccus_B | -9.06E-01 | 3.38E-05 | 2.36E-03 | 4.17E-02 |
| Thermicanus_B           | Butyricimonas_B  | -8.28E-01 | 6.70E-04 | 3.52E-02 | 2.17E-01 |
| Vulcanibacillus_B       | Butyrivibrio_B   | -8.55E-01 | 2.91E-04 | 1.68E-02 | 2.17E-01 |
| Denitrobacterium_B      | Caldilinea_B     | 1.00E+00  | 2.22E-16 | 2.21E-14 | 1.90E-06 |
| Desulfocurvus_B         | Caldilinea_B     | 1.00E+00  | 2.22E-16 | 2.21E-14 | 1.90E-06 |
| Desulfoluna_B           | Caldilinea_B     | 1.00E+00  | 2.22E-16 | 2.21E-14 | 1.90E-06 |
| Erysipelothrix_B        | Caldilinea_B     | -9.29E-01 | 8.34E-06 | 6.77E-04 | 7.84E-03 |
| Filimonas_B             | Caldilinea_B     | 1.00E+00  | 2.22E-16 | 2.21E-14 | 1.90E-06 |
| Kineococcus_B           | Caldilinea_B     | 1.00E+00  | 2.22E-16 | 2.21E-14 | 1.90E-06 |
| Nesiotobacter_B         | Caldilinea_B     | 1.00E+00  | 2.22E-16 | 2.21E-14 | 1.90E-06 |
| Nubsella_B              | Caldilinea_B     | 8.16E-01  | 9.31E-04 | 4.65E-02 | 2.68E-01 |

|                               |                    |           |          |          |          |
|-------------------------------|--------------------|-----------|----------|----------|----------|
| Oxalicibacterium_B            | Caldilinea_B       | 1.00E+00  | 2.22E-16 | 2.21E-14 | 1.90E-06 |
| Paracoccus_B                  | Caldilinea_B       | 1.00E+00  | 2.22E-16 | 2.21E-14 | 1.90E-06 |
| Paralactobacillus_B           | Caldilinea_B       | 1.00E+00  | 2.22E-16 | 2.21E-14 | 1.90E-06 |
| Proteiniphilum_B              | Caldilinea_B       | 1.00E+00  | 2.22E-16 | 2.21E-14 | 1.90E-06 |
| Psychrobacter_B               | Caldilinea_B       | 1.00E+00  | 2.22E-16 | 2.21E-14 | 1.90E-06 |
| Sediminibacterium_B           | Caldilinea_B       | 1.00E+00  | 2.22E-16 | 2.21E-14 | 1.90E-06 |
| Selenomonas_B                 | Caldilinea_B       | 1.00E+00  | 2.22E-16 | 2.21E-14 | 1.90E-06 |
| Stenoxybacter_B               | Caldilinea_B       | 1.00E+00  | 2.22E-16 | 2.21E-14 | 1.90E-06 |
| Talaromyces_F                 | Caldilinea_B       | 1.00E+00  | 2.22E-16 | 2.21E-14 | 1.90E-06 |
| unclassified_Pezizomycotina_F | Caldilinea_B       | -1.00E+00 | 2.22E-16 | 2.21E-14 | 1.90E-06 |
| Cryptanaerobacter_B           | Caldivirga_A       | 1.00E+00  | 2.22E-16 | 2.21E-14 | 1.90E-06 |
| Eremococcus_B                 | Caldivirga_A       | 1.00E+00  | 2.22E-16 | 2.21E-14 | 1.90E-06 |
| Fibrobacter_B                 | Caldivirga_A       | -8.30E-01 | 6.44E-04 | 3.40E-02 | 2.17E-01 |
| Flammeovirga_B                | Caldivirga_A       | 1.00E+00  | 2.22E-16 | 2.21E-14 | 1.90E-06 |
| Gracilimonas_B                | Caldivirga_A       | 1.00E+00  | 2.22E-16 | 2.21E-14 | 1.90E-06 |
| Halogeometricum_A             | Caldivirga_A       | 1.00E+00  | 2.22E-16 | 2.21E-14 | 1.90E-06 |
| Hydrogenobaculum_A            | Caldivirga_A       | 1.00E+00  | 2.22E-16 | 2.21E-14 | 1.90E-06 |
| Myceligenans_B                | Caldivirga_A       | 1.00E+00  | 2.22E-16 | 2.21E-14 | 1.90E-06 |
| Otidea_F                      | Caldivirga_A       | 1.00E+00  | 2.22E-16 | 2.21E-14 | 1.90E-06 |
| Quatrionicoccus_B             | Caldivirga_A       | 1.00E+00  | 2.22E-16 | 2.21E-14 | 1.90E-06 |
| Roseospirillum_B              | Caldivirga_A       | 1.00E+00  | 2.22E-16 | 2.21E-14 | 1.90E-06 |
| Thermodesulfobium_B           | Caldivirga_A       | 1.00E+00  | 2.22E-16 | 2.21E-14 | 1.90E-06 |
| Yaniella_B                    | Caldivirga_A       | 1.00E+00  | 2.22E-16 | 2.21E-14 | 1.90E-06 |
| Roseburia_B                   | Caminicella_B      | 8.76E-01  | 1.38E-04 | 8.53E-03 | 7.38E-02 |
| Cystofilobasidium_F           | Catellibacterium_B | -9.50E-01 | 1.34E-06 | 1.19E-04 | 2.81E-03 |
| Dechloromonas_B               | Catellibacterium_B | 1.00E+00  | 2.22E-16 | 2.21E-14 | 1.90E-06 |
| Filobasidium_F                | Catellibacterium_B | -9.68E-01 | 1.35E-07 | 1.26E-05 | 5.68E-04 |
| Gemmatimonas_B                | Catellibacterium_B | 1.00E+00  | 2.22E-16 | 2.21E-14 | 1.90E-06 |
| Geosporobacter_B              | Catellibacterium_B | -9.12E-01 | 2.43E-05 | 1.74E-03 | 1.77E-02 |
| Nocardioides_B                | Catellibacterium_B | 1.00E+00  | 2.22E-16 | 2.21E-14 | 1.90E-06 |

|                            |                    |           |          |          |          |
|----------------------------|--------------------|-----------|----------|----------|----------|
| Olivibacter_B              | Catellibacterium_B | -9.17E-01 | 1.75E-05 | 1.30E-03 | 7.84E-03 |
| Pelomonas_B                | Catellibacterium_B | 1.00E+00  | 2.22E-16 | 2.21E-14 | 1.90E-06 |
| Unc_Kirschsteiniiothelia_F | Catellibacterium_B | -1.00E+00 | 2.22E-16 | 2.21E-14 | 1.90E-06 |
| Verrucomicrobium_B         | Catellibacterium_B | -8.93E-01 | 6.47E-05 | 4.33E-03 | 6.01E-02 |
| Desulfovibrio_B            | Catenibacterium_B  | 9.25E-01  | 1.07E-05 | 8.45E-04 | 7.84E-03 |
| Hippea_B                   | Catenibacterium_B  | -8.55E-01 | 2.94E-04 | 1.70E-02 | 2.17E-01 |
| Prolixibacter_B            | Catenibacterium_B  | -9.03E-01 | 3.87E-05 | 2.68E-03 | 4.17E-02 |
| Rhodothermus_B             | Catenibacterium_B  | 9.25E-01  | 1.07E-05 | 8.45E-04 | 7.84E-03 |
| Shuttleworthia_B           | Catenibacterium_B  | -8.24E-01 | 7.62E-04 | 3.93E-02 | 2.68E-01 |
| Clostridiisalibacter_B     | Catonella_B        | -8.73E-01 | 1.53E-04 | 9.35E-03 | 1.04E-01 |
| Desulforegula_B            | Catonella_B        | -8.73E-01 | 1.53E-04 | 9.35E-03 | 1.04E-01 |
| Enterorhabdus_B            | Catonella_B        | 9.32E-01  | 6.71E-06 | 5.53E-04 | 7.84E-03 |
| Fastidiosipila_B           | Catonella_B        | 8.76E-01  | 1.37E-04 | 8.50E-03 | 7.38E-02 |
| Haloglycomyces_B           | Catonella_B        | -8.73E-01 | 1.53E-04 | 9.35E-03 | 1.04E-01 |
| Hespellia_B                | Catonella_B        | 9.02E-01  | 4.15E-05 | 2.86E-03 | 4.17E-02 |
| Lactonifactor_B            | Catonella_B        | 9.50E-01  | 1.30E-06 | 1.16E-04 | 2.81E-03 |
| Microscilla_B              | Catonella_B        | -8.73E-01 | 1.53E-04 | 9.35E-03 | 1.04E-01 |
| Oscillibacter_B            | Catonella_B        | 8.31E-01  | 6.23E-04 | 3.31E-02 | 2.17E-01 |
| Petrimonas_B               | Catonella_B        | -8.73E-01 | 1.53E-04 | 9.35E-03 | 1.04E-01 |
| Porphyromonas_B            | Catonella_B        | -8.73E-01 | 1.53E-04 | 9.35E-03 | 1.04E-01 |
| Propionibacterium_B        | Catonella_B        | -8.73E-01 | 1.53E-04 | 9.35E-03 | 1.04E-01 |
| Pseudomonas_B              | Catonella_B        | -8.73E-01 | 1.53E-04 | 9.35E-03 | 1.04E-01 |
| Sanguibacter_B             | Catonella_B        | -8.73E-01 | 1.53E-04 | 9.35E-03 | 1.04E-01 |
| Sharpea_B                  | Catonella_B        | 8.55E-01  | 2.93E-04 | 1.70E-02 | 2.17E-01 |
| Spirochaeta_B              | Catonella_B        | -8.73E-01 | 1.53E-04 | 9.35E-03 | 1.04E-01 |
| Syntrophococcus_B          | Catonella_B        | 8.78E-01  | 1.24E-04 | 7.78E-03 | 6.06E-02 |
| Turicibacter_B             | Catonella_B        | -8.28E-01 | 6.79E-04 | 3.56E-02 | 2.17E-01 |
| Duganella_B                | Centipeda_B        | 8.28E-01  | 6.84E-04 | 3.58E-02 | 2.17E-01 |
| Jeotgalicoccus_B           | Centipeda_B        | 8.36E-01  | 5.31E-04 | 2.89E-02 | 2.17E-01 |
| Coprococcus_B              | Cerasibacillus_B   | -8.41E-01 | 4.62E-04 | 2.56E-02 | 2.17E-01 |

|                          |                        |           |          |          |          |
|--------------------------|------------------------|-----------|----------|----------|----------|
| Pseudosphingobacterium_B | Cerasibacillus_B       | -8.50E-01 | 3.46E-04 | 1.97E-02 | 2.17E-01 |
| Subdoligranulum_B        | Chattonella_F          | -8.40E-01 | 4.73E-04 | 2.61E-02 | 2.17E-01 |
| Succinivibrio_B          | Chattonella_F          | 8.35E-01  | 5.52E-04 | 2.99E-02 | 2.17E-01 |
| Taphrina_F               | Chattonella_F          | 8.35E-01  | 5.52E-04 | 2.99E-02 | 2.17E-01 |
| Conexibacter_B           | Cloacibacillus_B       | 1.00E+00  | 2.22E-16 | 2.21E-14 | 1.90E-06 |
| Dolosigranulum_B         | Cloacibacillus_B       | 1.00E+00  | 2.22E-16 | 2.21E-14 | 1.90E-06 |
| Effluviibacter_B         | Cloacibacillus_B       | -8.27E-01 | 6.99E-04 | 3.65E-02 | 2.68E-01 |
| Kordia_B                 | Cloacibacillus_B       | 1.00E+00  | 2.22E-16 | 2.21E-14 | 1.90E-06 |
| Labeledella_B            | Cloacibacillus_B       | 1.00E+00  | 2.22E-16 | 2.21E-14 | 1.90E-06 |
| Nicoletella_B            | Cloacibacillus_B       | 1.00E+00  | 2.22E-16 | 2.21E-14 | 1.90E-06 |
| Okibacterium_B           | Cloacibacillus_B       | 1.00E+00  | 2.22E-16 | 2.21E-14 | 1.90E-06 |
| Olsenella_B              | Cloacibacillus_B       | -9.47E-01 | 1.78E-06 | 1.57E-04 | 2.81E-03 |
| Parascardovia_B          | Cloacibacillus_B       | 1.00E+00  | 2.22E-16 | 2.21E-14 | 1.90E-06 |
| Rhodovarius_B            | Cloacibacillus_B       | 1.00E+00  | 2.22E-16 | 2.21E-14 | 1.90E-06 |
| Slackia_B                | Cloacibacillus_B       | -9.07E-01 | 3.20E-05 | 2.25E-03 | 4.17E-02 |
| Thermovenabulum_B        | Cloacibacillus_B       | 1.00E+00  | 2.22E-16 | 2.21E-14 | 1.90E-06 |
| Desulforegula_B          | Clostridiisalibacter_B | 1.00E+00  | 2.22E-16 | 2.21E-14 | 1.90E-06 |
| Enterorhabdus_B          | Clostridiisalibacter_B | -9.17E-01 | 1.75E-05 | 1.30E-03 | 7.84E-03 |
| Haloglycomyces_B         | Clostridiisalibacter_B | 1.00E+00  | 2.22E-16 | 2.21E-14 | 1.90E-06 |
| Hespellia_B              | Clostridiisalibacter_B | -9.70E-01 | 1.04E-07 | 9.77E-06 | 3.19E-04 |
| Microscilla_B            | Clostridiisalibacter_B | 1.00E+00  | 2.22E-16 | 2.21E-14 | 1.90E-06 |
| Petrimonas_B             | Clostridiisalibacter_B | 1.00E+00  | 2.22E-16 | 2.21E-14 | 1.90E-06 |
| Porphyromonas_B          | Clostridiisalibacter_B | 1.00E+00  | 2.22E-16 | 2.21E-14 | 1.90E-06 |
| Propionibacterium_B      | Clostridiisalibacter_B | 1.00E+00  | 2.22E-16 | 2.21E-14 | 1.90E-06 |
| Pseudomonas_B            | Clostridiisalibacter_B | 1.00E+00  | 2.22E-16 | 2.21E-14 | 1.90E-06 |
| Sanguibacter_B           | Clostridiisalibacter_B | 1.00E+00  | 2.22E-16 | 2.21E-14 | 1.90E-06 |
| Shuttleworthia_B         | Clostridiisalibacter_B | -8.88E-01 | 8.23E-05 | 5.41E-03 | 6.01E-02 |
| Spirochaeta_B            | Clostridiisalibacter_B | 1.00E+00  | 2.22E-16 | 2.21E-14 | 1.90E-06 |
| unclassified_F           | Clostridiisalibacter_B | -8.44E-01 | 4.25E-04 | 2.37E-02 | 2.17E-01 |
| Fulvimonas_B             | Coenonia_B             | 1.00E+00  | 2.22E-16 | 2.21E-14 | 1.90E-06 |

|                      |                 |           |          |          |          |
|----------------------|-----------------|-----------|----------|----------|----------|
| Fulvivirga_B         | Coenonia_B      | 1.00E+00  | 2.22E-16 | 2.21E-14 | 1.90E-06 |
| Jonesia_B            | Coenonia_B      | 1.00E+00  | 2.22E-16 | 2.21E-14 | 1.90E-06 |
| Lishizhenia_B        | Coenonia_B      | 1.00E+00  | 2.22E-16 | 2.21E-14 | 1.90E-06 |
| Ornithobacterium_B   | Coenonia_B      | -9.11E-01 | 2.50E-05 | 1.78E-03 | 3.13E-02 |
| Parachlamydia_B      | Coenonia_B      | 1.00E+00  | 2.22E-16 | 2.21E-14 | 1.90E-06 |
| Sphaerobacter_B      | Coenonia_B      | 1.00E+00  | 2.22E-16 | 2.21E-14 | 1.90E-06 |
| Sporanaerobacter_B   | Coenonia_B      | 1.00E+00  | 2.22E-16 | 2.21E-14 | 1.90E-06 |
| Unc_Kockovaella_F    | Coenonia_B      | 1.00E+00  | 2.22E-16 | 2.21E-14 | 1.90E-06 |
| Venenivibrio_B       | Coenonia_B      | 1.00E+00  | 2.22E-16 | 2.21E-14 | 1.90E-06 |
| Zunongwangia_B       | Coenonia_B      | 1.00E+00  | 2.22E-16 | 2.21E-14 | 1.90E-06 |
| Desmospora_B         | Collinsella_B   | -8.22E-01 | 7.97E-04 | 4.08E-02 | 2.68E-01 |
| Haliscomenobacter_B  | Collinsella_B   | -8.43E-01 | 4.28E-04 | 2.39E-02 | 2.17E-01 |
| Unc_Sarcinomyces_F   | Collinsella_B   | -8.25E-01 | 7.29E-04 | 3.78E-02 | 2.68E-01 |
| Dolosigranulum_B     | Conexibacter_B  | 1.00E+00  | 2.22E-16 | 2.21E-14 | 1.90E-06 |
| Effluviibacter_B     | Conexibacter_B  | -8.27E-01 | 6.99E-04 | 3.65E-02 | 2.68E-01 |
| Kordia_B             | Conexibacter_B  | 1.00E+00  | 2.22E-16 | 2.21E-14 | 1.90E-06 |
| Labeledella_B        | Conexibacter_B  | 1.00E+00  | 2.22E-16 | 2.21E-14 | 1.90E-06 |
| Nicoletella_B        | Conexibacter_B  | 1.00E+00  | 2.22E-16 | 2.21E-14 | 1.90E-06 |
| Okibacterium_B       | Conexibacter_B  | 1.00E+00  | 2.22E-16 | 2.21E-14 | 1.90E-06 |
| Olsenella_B          | Conexibacter_B  | -9.47E-01 | 1.78E-06 | 1.57E-04 | 2.81E-03 |
| Parascardovia_B      | Conexibacter_B  | 1.00E+00  | 2.22E-16 | 2.21E-14 | 1.90E-06 |
| Rhodovarius_B        | Conexibacter_B  | 1.00E+00  | 2.22E-16 | 2.21E-14 | 1.90E-06 |
| Slackia_B            | Conexibacter_B  | -9.07E-01 | 3.20E-05 | 2.25E-03 | 4.17E-02 |
| Thermovenabulum_B    | Conexibacter_B  | 1.00E+00  | 2.22E-16 | 2.21E-14 | 1.90E-06 |
| Dendrosporobacter_B  | Coprobacillus_B | -8.38E-01 | 5.09E-04 | 2.78E-02 | 2.17E-01 |
| Facklamia_B          | Coprobacillus_B | -8.38E-01 | 5.09E-04 | 2.78E-02 | 2.17E-01 |
| Galbibacter_B        | Coprobacillus_B | -8.38E-01 | 5.09E-04 | 2.78E-02 | 2.17E-01 |
| Lacticigenium_B      | Coprobacillus_B | -8.38E-01 | 5.09E-04 | 2.78E-02 | 2.17E-01 |
| Methylobacterium_B   | Coprobacillus_B | -8.38E-01 | 5.09E-04 | 2.78E-02 | 2.17E-01 |
| Ornithinimicrobium_B | Coprobacillus_B | -8.38E-01 | 5.09E-04 | 2.78E-02 | 2.17E-01 |

|                                     |                     |           |          |          |          |
|-------------------------------------|---------------------|-----------|----------|----------|----------|
| Oxalophagus_B                       | Coprobacillus_B     | 8.98E-01  | 4.96E-05 | 3.38E-03 | 6.01E-02 |
| Rhodopila_B                         | Coprobacillus_B     | -8.38E-01 | 5.09E-04 | 2.78E-02 | 2.17E-01 |
| Trichococcus_B                      | Coprobacillus_B     | -8.38E-01 | 5.09E-04 | 2.78E-02 | 2.17E-01 |
| Pseudosphingobacterium_B            | Coprococcus_B       | 8.64E-01  | 2.12E-04 | 1.26E-02 | 1.04E-01 |
| Roseburia_B                         | Coprococcus_B       | 9.09E-01  | 2.82E-05 | 1.99E-03 | 3.13E-02 |
| Staphylococcus_B                    | Coprococcus_B       | -9.45E-01 | 2.20E-06 | 1.91E-04 | 4.74E-03 |
| Syntrophococcus_B                   | Coprococcus_B       | 8.75E-01  | 1.39E-04 | 8.62E-03 | 7.38E-02 |
| Desulfotomaculum_B                  | Coriobacterium_B    | 1.00E+00  | 2.22E-16 | 2.21E-14 | 1.90E-06 |
| Ganoderma_F                         | Coriobacterium_B    | 1.00E+00  | 2.22E-16 | 2.21E-14 | 1.90E-06 |
| Geosmithia_putterillii_sensu_Pitt_F | Coriobacterium_B    | -9.16E-01 | 1.90E-05 | 1.39E-03 | 1.77E-02 |
| Johnsonella_B                       | Coriobacterium_B    | 1.00E+00  | 2.22E-16 | 2.21E-14 | 1.90E-06 |
| Leptonema_B                         | Coriobacterium_B    | 1.00E+00  | 2.22E-16 | 2.21E-14 | 1.90E-06 |
| Lutimonas_B                         | Coriobacterium_B    | 1.00E+00  | 2.22E-16 | 2.21E-14 | 1.90E-06 |
| Massilia_B                          | Coriobacterium_B    | 1.00E+00  | 2.22E-16 | 2.21E-14 | 1.90E-06 |
| Parasegetibacter_B                  | Coriobacterium_B    | -9.42E-01 | 2.86E-06 | 2.46E-04 | 7.84E-03 |
| Schwartzia_B                        | Coriobacterium_B    | -9.26E-01 | 9.83E-06 | 7.85E-04 | 7.84E-03 |
| Tepidanaerobacter_B                 | Coriobacterium_B    | 1.00E+00  | 2.22E-16 | 2.21E-14 | 1.90E-06 |
| Thermoflavimicrobium_B              | Coriobacterium_B    | 1.00E+00  | 2.22E-16 | 2.21E-14 | 1.90E-06 |
| Unc_Verticillium_F                  | Coriobacterium_B    | 1.00E+00  | 2.22E-16 | 2.21E-14 | 1.90E-06 |
| Sporotomaculum_B                    | Corynebacterium_B   | -8.51E-01 | 3.41E-04 | 1.95E-02 | 2.17E-01 |
| Eremococcus_B                       | Cryptanaerobacter_B | 1.00E+00  | 2.22E-16 | 2.21E-14 | 1.90E-06 |
| Fibrobacter_B                       | Cryptanaerobacter_B | -8.30E-01 | 6.44E-04 | 3.40E-02 | 2.17E-01 |
| Flammeovirga_B                      | Cryptanaerobacter_B | 1.00E+00  | 2.22E-16 | 2.21E-14 | 1.90E-06 |
| Gracilimonas_B                      | Cryptanaerobacter_B | 1.00E+00  | 2.22E-16 | 2.21E-14 | 1.90E-06 |
| Halogeometricum_A                   | Cryptanaerobacter_B | 1.00E+00  | 2.22E-16 | 2.21E-14 | 1.90E-06 |
| Hydrogenobaculum_A                  | Cryptanaerobacter_B | 1.00E+00  | 2.22E-16 | 2.21E-14 | 1.90E-06 |
| Myceligenersans_B                   | Cryptanaerobacter_B | 1.00E+00  | 2.22E-16 | 2.21E-14 | 1.90E-06 |
| Otidea_F                            | Cryptanaerobacter_B | 1.00E+00  | 2.22E-16 | 2.21E-14 | 1.90E-06 |
| Quatrionicoccus_B                   | Cryptanaerobacter_B | 1.00E+00  | 2.22E-16 | 2.21E-14 | 1.90E-06 |
| Roseosporillum_B                    | Cryptanaerobacter_B | 1.00E+00  | 2.22E-16 | 2.21E-14 | 1.90E-06 |

|                            |                     |           |          |          |          |
|----------------------------|---------------------|-----------|----------|----------|----------|
| Thermodesulfobium_B        | Cryptanaerobacter_B | 1.00E+00  | 2.22E-16 | 2.21E-14 | 1.90E-06 |
| Yaniella_B                 | Cryptanaerobacter_B | 1.00E+00  | 2.22E-16 | 2.21E-14 | 1.90E-06 |
| Desulfonispota_B           | Curtobacterium_B    | 9.57E-01  | 6.48E-07 | 5.91E-05 | 2.21E-03 |
| Holophaga_B                | Curtobacterium_B    | 1.00E+00  | 2.22E-16 | 2.21E-14 | 1.90E-06 |
| Dechloromonas_B            | Cystofilobasidium_F | -9.50E-01 | 1.34E-06 | 1.19E-04 | 2.81E-03 |
| Filobasidium_F             | Cystofilobasidium_F | 9.03E-01  | 3.99E-05 | 2.76E-03 | 4.17E-02 |
| Gemmatimonas_B             | Cystofilobasidium_F | -9.50E-01 | 1.34E-06 | 1.19E-04 | 2.81E-03 |
| Geosporobacter_B           | Cystofilobasidium_F | 8.94E-01  | 6.31E-05 | 4.23E-03 | 6.01E-02 |
| Nocardioides_B             | Cystofilobasidium_F | -9.50E-01 | 1.34E-06 | 1.19E-04 | 2.81E-03 |
| Olivibacter_B              | Cystofilobasidium_F | 8.32E-01  | 6.10E-04 | 3.25E-02 | 2.17E-01 |
| Pelomonas_B                | Cystofilobasidium_F | -9.50E-01 | 1.34E-06 | 1.19E-04 | 2.81E-03 |
| Unc_Kirschsteiniiothelia_F | Cystofilobasidium_F | 9.50E-01  | 1.34E-06 | 1.19E-04 | 2.81E-03 |
| Verrucomicrobium_B         | Cystofilobasidium_F | 9.29E-01  | 8.06E-06 | 6.55E-04 | 7.84E-03 |
| Filobasidium_F             | Dechloromonas_B     | -9.68E-01 | 1.35E-07 | 1.26E-05 | 5.68E-04 |
| Gemmatimonas_B             | Dechloromonas_B     | 1.00E+00  | 2.22E-16 | 2.21E-14 | 1.90E-06 |
| Geosporobacter_B           | Dechloromonas_B     | -9.12E-01 | 2.43E-05 | 1.74E-03 | 1.77E-02 |
| Nocardioides_B             | Dechloromonas_B     | 1.00E+00  | 2.22E-16 | 2.21E-14 | 1.90E-06 |
| Olivibacter_B              | Dechloromonas_B     | -9.17E-01 | 1.75E-05 | 1.30E-03 | 7.84E-03 |
| Pelomonas_B                | Dechloromonas_B     | 1.00E+00  | 2.22E-16 | 2.21E-14 | 1.90E-06 |
| Unc_Kirschsteiniiothelia_F | Dechloromonas_B     | -1.00E+00 | 2.22E-16 | 2.21E-14 | 1.90E-06 |
| Verrucomicrobium_B         | Dechloromonas_B     | -8.93E-01 | 6.47E-05 | 4.33E-03 | 6.01E-02 |
| Facklamia_B                | Dendrosporobacter_B | 1.00E+00  | 2.22E-16 | 2.21E-14 | 1.90E-06 |
| Galbibacter_B              | Dendrosporobacter_B | 1.00E+00  | 2.22E-16 | 2.21E-14 | 1.90E-06 |
| Lacticigenium_B            | Dendrosporobacter_B | 1.00E+00  | 2.22E-16 | 2.21E-14 | 1.90E-06 |
| Methylobacterium_B         | Dendrosporobacter_B | 1.00E+00  | 2.22E-16 | 2.21E-14 | 1.90E-06 |
| Ornithinimicrobium_B       | Dendrosporobacter_B | 1.00E+00  | 2.22E-16 | 2.21E-14 | 1.90E-06 |
| Oxalophagus_B              | Dendrosporobacter_B | -9.54E-01 | 8.65E-07 | 7.82E-05 | 2.81E-03 |
| Pseudozobellia_B           | Dendrosporobacter_B | -9.16E-01 | 1.90E-05 | 1.39E-03 | 1.77E-02 |
| Rhodopila_B                | Dendrosporobacter_B | 1.00E+00  | 2.22E-16 | 2.21E-14 | 1.90E-06 |
| Streptophyta_B             | Dendrosporobacter_B | -9.16E-01 | 1.90E-05 | 1.39E-03 | 1.77E-02 |

|                               |                     |           |          |          |          |
|-------------------------------|---------------------|-----------|----------|----------|----------|
| Trichococcus_B                | Dendrosporobacter_B | 1.00E+00  | 2.22E-16 | 2.21E-14 | 1.90E-06 |
| Desulfocurvus_B               | Denitrobacterium_B  | 1.00E+00  | 2.22E-16 | 2.21E-14 | 1.90E-06 |
| Desulfoluna_B                 | Denitrobacterium_B  | 1.00E+00  | 2.22E-16 | 2.21E-14 | 1.90E-06 |
| Erysipelothrix_B              | Denitrobacterium_B  | -9.29E-01 | 8.34E-06 | 6.77E-04 | 7.84E-03 |
| Filimonas_B                   | Denitrobacterium_B  | 1.00E+00  | 2.22E-16 | 2.21E-14 | 1.90E-06 |
| Kineococcus_B                 | Denitrobacterium_B  | 1.00E+00  | 2.22E-16 | 2.21E-14 | 1.90E-06 |
| Nesiotobacter_B               | Denitrobacterium_B  | 1.00E+00  | 2.22E-16 | 2.21E-14 | 1.90E-06 |
| Nubsella_B                    | Denitrobacterium_B  | 8.16E-01  | 9.31E-04 | 4.65E-02 | 2.68E-01 |
| Oxalicibacterium_B            | Denitrobacterium_B  | 1.00E+00  | 2.22E-16 | 2.21E-14 | 1.90E-06 |
| Paracoccus_B                  | Denitrobacterium_B  | 1.00E+00  | 2.22E-16 | 2.21E-14 | 1.90E-06 |
| Paralactobacillus_B           | Denitrobacterium_B  | 1.00E+00  | 2.22E-16 | 2.21E-14 | 1.90E-06 |
| Proteiniphilum_B              | Denitrobacterium_B  | 1.00E+00  | 2.22E-16 | 2.21E-14 | 1.90E-06 |
| Psychrobacter_B               | Denitrobacterium_B  | 1.00E+00  | 2.22E-16 | 2.21E-14 | 1.90E-06 |
| Sediminibacterium_B           | Denitrobacterium_B  | 1.00E+00  | 2.22E-16 | 2.21E-14 | 1.90E-06 |
| Selenomonas_B                 | Denitrobacterium_B  | 1.00E+00  | 2.22E-16 | 2.21E-14 | 1.90E-06 |
| Stenoxybacter_B               | Denitrobacterium_B  | 1.00E+00  | 2.22E-16 | 2.21E-14 | 1.90E-06 |
| Talaromyces_F                 | Denitrobacterium_B  | 1.00E+00  | 2.22E-16 | 2.21E-14 | 1.90E-06 |
| unclassified_Pezizomycotina_F | Denitrobacterium_B  | -1.00E+00 | 2.22E-16 | 2.21E-14 | 1.90E-06 |
| Desulfatiferula_B             | Desemzia_B          | 1.00E+00  | 2.22E-16 | 2.21E-14 | 1.90E-06 |
| Holtermannia_F                | Desemzia_B          | 1.00E+00  | 2.22E-16 | 2.21E-14 | 1.90E-06 |
| Leuconostoc_B                 | Desemzia_B          | 1.00E+00  | 2.22E-16 | 2.21E-14 | 1.90E-06 |
| Levilinea_B                   | Desemzia_B          | -9.17E-01 | 1.75E-05 | 1.30E-03 | 7.84E-03 |
| Parasporobacterium_B          | Desemzia_B          | 8.63E-01  | 2.19E-04 | 1.29E-02 | 2.17E-01 |
| Phascolarctobacterium_B       | Desemzia_B          | 1.00E+00  | 2.22E-16 | 2.21E-14 | 1.90E-06 |
| Pirellula_B                   | Desemzia_B          | 1.00E+00  | 2.22E-16 | 2.21E-14 | 1.90E-06 |
| Rhodopirellula_B              | Desemzia_B          | -8.76E-01 | 1.33E-04 | 8.28E-03 | 7.38E-02 |
| Rudanella_B                   | Desemzia_B          | 1.00E+00  | 2.22E-16 | 2.21E-14 | 1.90E-06 |
| Thermonema_B                  | Desemzia_B          | 1.00E+00  | 2.22E-16 | 2.21E-14 | 1.90E-06 |
| Tropheryma_B                  | Desemzia_B          | 1.00E+00  | 2.22E-16 | 2.21E-14 | 1.90E-06 |
| Unc_Cryptococcus_F            | Desemzia_B          | 1.00E+00  | 2.22E-16 | 2.21E-14 | 1.90E-06 |

|                         |                   |           |          |          |          |
|-------------------------|-------------------|-----------|----------|----------|----------|
| Verminephrobacter_B     | Desemzia_B        | 1.00E+00  | 2.22E-16 | 2.21E-14 | 1.90E-06 |
| Haliscomenobacter_B     | Desmospora_B      | 8.47E-01  | 3.83E-04 | 2.16E-02 | 2.17E-01 |
| Sporobacter_B           | Desmospora_B      | -8.28E-01 | 6.86E-04 | 3.59E-02 | 2.17E-01 |
| Holtermannia_F          | Desulfatiferula_B | 1.00E+00  | 2.22E-16 | 2.21E-14 | 1.90E-06 |
| Leuconostoc_B           | Desulfatiferula_B | 1.00E+00  | 2.22E-16 | 2.21E-14 | 1.90E-06 |
| Levilinea_B             | Desulfatiferula_B | -9.17E-01 | 1.75E-05 | 1.30E-03 | 7.84E-03 |
| Parasporobacterium_B    | Desulfatiferula_B | 8.63E-01  | 2.19E-04 | 1.29E-02 | 2.17E-01 |
| Phascolarctobacterium_B | Desulfatiferula_B | 1.00E+00  | 2.22E-16 | 2.21E-14 | 1.90E-06 |
| Pirellula_B             | Desulfatiferula_B | 1.00E+00  | 2.22E-16 | 2.21E-14 | 1.90E-06 |
| Rhodopirellula_B        | Desulfatiferula_B | -8.76E-01 | 1.33E-04 | 8.28E-03 | 7.38E-02 |
| Rudanella_B             | Desulfatiferula_B | 1.00E+00  | 2.22E-16 | 2.21E-14 | 1.90E-06 |
| Thermonema_B            | Desulfatiferula_B | 1.00E+00  | 2.22E-16 | 2.21E-14 | 1.90E-06 |
| Tropheryma_B            | Desulfatiferula_B | 1.00E+00  | 2.22E-16 | 2.21E-14 | 1.90E-06 |
| Unc_Cryptococcus_F      | Desulfatiferula_B | 1.00E+00  | 2.22E-16 | 2.21E-14 | 1.90E-06 |
| Verminephrobacter_B     | Desulfatiferula_B | 1.00E+00  | 2.22E-16 | 2.21E-14 | 1.90E-06 |
| Desulfoluna_B           | Desulfocurvus_B   | 1.00E+00  | 2.22E-16 | 2.21E-14 | 1.90E-06 |
| Erysipelothrix_B        | Desulfocurvus_B   | -9.29E-01 | 8.34E-06 | 6.77E-04 | 7.84E-03 |
| Filimonas_B             | Desulfocurvus_B   | 1.00E+00  | 2.22E-16 | 2.21E-14 | 1.90E-06 |
| Kineococcus_B           | Desulfocurvus_B   | 1.00E+00  | 2.22E-16 | 2.21E-14 | 1.90E-06 |
| Nesiotobacter_B         | Desulfocurvus_B   | 1.00E+00  | 2.22E-16 | 2.21E-14 | 1.90E-06 |
| Nubsella_B              | Desulfocurvus_B   | 8.16E-01  | 9.31E-04 | 4.65E-02 | 2.68E-01 |
| Oxalicibacterium_B      | Desulfocurvus_B   | 1.00E+00  | 2.22E-16 | 2.21E-14 | 1.90E-06 |
| Paracoccus_B            | Desulfocurvus_B   | 1.00E+00  | 2.22E-16 | 2.21E-14 | 1.90E-06 |
| Paralactobacillus_B     | Desulfocurvus_B   | 1.00E+00  | 2.22E-16 | 2.21E-14 | 1.90E-06 |
| Proteiniphilum_B        | Desulfocurvus_B   | 1.00E+00  | 2.22E-16 | 2.21E-14 | 1.90E-06 |
| Psychrobacter_B         | Desulfocurvus_B   | 1.00E+00  | 2.22E-16 | 2.21E-14 | 1.90E-06 |
| Sediminibacterium_B     | Desulfocurvus_B   | 1.00E+00  | 2.22E-16 | 2.21E-14 | 1.90E-06 |
| Selenomonas_B           | Desulfocurvus_B   | 1.00E+00  | 2.22E-16 | 2.21E-14 | 1.90E-06 |
| Stenoxybacter_B         | Desulfocurvus_B   | 1.00E+00  | 2.22E-16 | 2.21E-14 | 1.90E-06 |
| Talaromyces_F           | Desulfocurvus_B   | 1.00E+00  | 2.22E-16 | 2.21E-14 | 1.90E-06 |

|                               |                        |           |          |          |          |
|-------------------------------|------------------------|-----------|----------|----------|----------|
| unclassified_Pezizomycotina_F | Desulfocurvus_B        | -1.00E+00 | 2.22E-16 | 2.21E-14 | 1.90E-06 |
| Erysipelothrix_B              | Desulfoluna_B          | -9.29E-01 | 8.34E-06 | 6.77E-04 | 7.84E-03 |
| Filimonas_B                   | Desulfoluna_B          | 1.00E+00  | 2.22E-16 | 2.21E-14 | 1.90E-06 |
| Kineococcus_B                 | Desulfoluna_B          | 1.00E+00  | 2.22E-16 | 2.21E-14 | 1.90E-06 |
| Nesiotobacter_B               | Desulfoluna_B          | 1.00E+00  | 2.22E-16 | 2.21E-14 | 1.90E-06 |
| Nubsella_B                    | Desulfoluna_B          | 8.16E-01  | 9.31E-04 | 4.65E-02 | 2.68E-01 |
| Oxalicibacterium_B            | Desulfoluna_B          | 1.00E+00  | 2.22E-16 | 2.21E-14 | 1.90E-06 |
| Paracoccus_B                  | Desulfoluna_B          | 1.00E+00  | 2.22E-16 | 2.21E-14 | 1.90E-06 |
| Paralactobacillus_B           | Desulfoluna_B          | 1.00E+00  | 2.22E-16 | 2.21E-14 | 1.90E-06 |
| Proteiniphilum_B              | Desulfoluna_B          | 1.00E+00  | 2.22E-16 | 2.21E-14 | 1.90E-06 |
| Psychrobacter_B               | Desulfoluna_B          | 1.00E+00  | 2.22E-16 | 2.21E-14 | 1.90E-06 |
| Sediminibacterium_B           | Desulfoluna_B          | 1.00E+00  | 2.22E-16 | 2.21E-14 | 1.90E-06 |
| Selenomonas_B                 | Desulfoluna_B          | 1.00E+00  | 2.22E-16 | 2.21E-14 | 1.90E-06 |
| Stenoxybacter_B               | Desulfoluna_B          | 1.00E+00  | 2.22E-16 | 2.21E-14 | 1.90E-06 |
| Talaromyces_F                 | Desulfoluna_B          | 1.00E+00  | 2.22E-16 | 2.21E-14 | 1.90E-06 |
| unclassified_Pezizomycotina_F | Desulfoluna_B          | -1.00E+00 | 2.22E-16 | 2.21E-14 | 1.90E-06 |
| Fusibacter_B                  | Desulfonatronovibrio_B | 9.91E-01  | 1.88E-10 | 1.85E-08 | 5.47E-06 |
| Hallella_B                    | Desulfonatronovibrio_B | 8.94E-01  | 6.07E-05 | 4.09E-03 | 6.01E-02 |
| Howardella_B                  | Desulfonatronovibrio_B | 8.26E-01  | 7.24E-04 | 3.76E-02 | 2.68E-01 |
| Parvimonas_B                  | Desulfonatronovibrio_B | -9.38E-01 | 3.95E-06 | 3.36E-04 | 7.84E-03 |
| Ruminococcus_B                | Desulfonatronovibrio_B | 8.39E-01  | 4.85E-04 | 2.67E-02 | 2.17E-01 |
| Scytinostroma_F               | Desulfonatronovibrio_B | 9.91E-01  | 1.88E-10 | 1.85E-08 | 5.47E-06 |
| Holophaga_B                   | Desulfonispora_B       | 9.57E-01  | 6.48E-07 | 5.91E-05 | 2.21E-03 |
| Howardella_B                  | Desulfonispora_B       | 8.55E-01  | 2.88E-04 | 1.67E-02 | 2.17E-01 |
| Thermogymnomonas_A            | Desulfonispora_B       | 8.16E-01  | 9.48E-04 | 4.72E-02 | 2.68E-01 |
| Enterorhabdus_B               | Desulforegula_B        | -9.17E-01 | 1.75E-05 | 1.30E-03 | 7.84E-03 |
| Haloglycomyces_B              | Desulforegula_B        | 1.00E+00  | 2.22E-16 | 2.21E-14 | 1.90E-06 |
| Hespellia_B                   | Desulforegula_B        | -9.70E-01 | 1.04E-07 | 9.77E-06 | 3.19E-04 |
| Microscilla_B                 | Desulforegula_B        | 1.00E+00  | 2.22E-16 | 2.21E-14 | 1.90E-06 |
| Petrimonas_B                  | Desulforegula_B        | 1.00E+00  | 2.22E-16 | 2.21E-14 | 1.90E-06 |

|                                     |                       |           |          |          |          |
|-------------------------------------|-----------------------|-----------|----------|----------|----------|
| Porphyromonas_B                     | Desulforegula_B       | 1.00E+00  | 2.22E-16 | 2.21E-14 | 1.90E-06 |
| Propionibacterium_B                 | Desulforegula_B       | 1.00E+00  | 2.22E-16 | 2.21E-14 | 1.90E-06 |
| Pseudomonas_B                       | Desulforegula_B       | 1.00E+00  | 2.22E-16 | 2.21E-14 | 1.90E-06 |
| Sanguibacter_B                      | Desulforegula_B       | 1.00E+00  | 2.22E-16 | 2.21E-14 | 1.90E-06 |
| Shuttleworthia_B                    | Desulforegula_B       | -8.88E-01 | 8.23E-05 | 5.41E-03 | 6.01E-02 |
| Spirochaeta_B                       | Desulforegula_B       | 1.00E+00  | 2.22E-16 | 2.21E-14 | 1.90E-06 |
| unclassified_F                      | Desulforegula_B       | -8.44E-01 | 4.25E-04 | 2.37E-02 | 2.17E-01 |
| Ganoderma_F                         | Desulfotomaculum_B    | 1.00E+00  | 2.22E-16 | 2.21E-14 | 1.90E-06 |
| Geosmithia_putterillii_sensu_Pitt_F | Desulfotomaculum_B    | -9.16E-01 | 1.90E-05 | 1.39E-03 | 1.77E-02 |
| Johnsonella_B                       | Desulfotomaculum_B    | 1.00E+00  | 2.22E-16 | 2.21E-14 | 1.90E-06 |
| Leptonema_B                         | Desulfotomaculum_B    | 1.00E+00  | 2.22E-16 | 2.21E-14 | 1.90E-06 |
| Lutimonas_B                         | Desulfotomaculum_B    | 1.00E+00  | 2.22E-16 | 2.21E-14 | 1.90E-06 |
| Massilia_B                          | Desulfotomaculum_B    | 1.00E+00  | 2.22E-16 | 2.21E-14 | 1.90E-06 |
| Parasegetibacter_B                  | Desulfotomaculum_B    | -9.42E-01 | 2.86E-06 | 2.46E-04 | 7.84E-03 |
| Schwartzia_B                        | Desulfotomaculum_B    | -9.26E-01 | 9.83E-06 | 7.85E-04 | 7.84E-03 |
| Tepidanaerobacter_B                 | Desulfotomaculum_B    | 1.00E+00  | 2.22E-16 | 2.21E-14 | 1.90E-06 |
| Thermoflavimicrobium_B              | Desulfotomaculum_B    | 1.00E+00  | 2.22E-16 | 2.21E-14 | 1.90E-06 |
| Unc_Verticillium_F                  | Desulfotomaculum_B    | 1.00E+00  | 2.22E-16 | 2.21E-14 | 1.90E-06 |
| Prolixibacter_B                     | Desulfovibrio_B       | -9.86E-01 | 1.64E-09 | 1.60E-07 | 2.89E-05 |
| Rhodothermus_B                      | Desulfovibrio_B       | 1.00E+00  | 2.22E-16 | 2.21E-14 | 1.90E-06 |
| Penicillioptosis_F                  | Desulfurispora_B      | 1.00E+00  | 2.22E-16 | 2.21E-14 | 1.90E-06 |
| Planococcus_B                       | Desulfurispora_B      | 1.00E+00  | 2.22E-16 | 2.21E-14 | 1.90E-06 |
| Protomyces_F                        | Dethiosulfatibacter_B | 8.36E-01  | 5.31E-04 | 2.89E-02 | 2.17E-01 |
| Mogibacterium_B                     | Dethiosulfatibacter_B | -8.39E-01 | 4.91E-04 | 2.70E-02 | 2.17E-01 |
| Effluviibacter_B                    | Dolosigranulum_B      | -8.27E-01 | 6.99E-04 | 3.65E-02 | 2.68E-01 |
| Kordia_B                            | Dolosigranulum_B      | 1.00E+00  | 2.22E-16 | 2.21E-14 | 1.90E-06 |
| Labedella_B                         | Dolosigranulum_B      | 1.00E+00  | 2.22E-16 | 2.21E-14 | 1.90E-06 |
| Nicoletella_B                       | Dolosigranulum_B      | 1.00E+00  | 2.22E-16 | 2.21E-14 | 1.90E-06 |
| Okibacterium_B                      | Dolosigranulum_B      | 1.00E+00  | 2.22E-16 | 2.21E-14 | 1.90E-06 |
| Olsenella_B                         | Dolosigranulum_B      | -9.47E-01 | 1.78E-06 | 1.57E-04 | 2.81E-03 |

|                     |                       |           |          |          |          |
|---------------------|-----------------------|-----------|----------|----------|----------|
| Parascardovia_B     | Dolosigranulum_B      | 1.00E+00  | 2.22E-16 | 2.21E-14 | 1.90E-06 |
| Rhodovarius_B       | Dolosigranulum_B      | 1.00E+00  | 2.22E-16 | 2.21E-14 | 1.90E-06 |
| Slackia_B           | Dolosigranulum_B      | -9.07E-01 | 3.20E-05 | 2.25E-03 | 4.17E-02 |
| Thermovenabulum_B   | Dolosigranulum_B      | 1.00E+00  | 2.22E-16 | 2.21E-14 | 1.90E-06 |
| Proteiniborus_B     | Dorea_B               | 8.23E-01  | 7.79E-04 | 4.00E-02 | 2.68E-01 |
| Treponema_B         | Dothideomycetes_F [3] | -8.60E-01 | 2.42E-04 | 1.42E-02 | 2.17E-01 |
| Frigoribacterium_B  | Duganella_B           | -9.86E-01 | 2.08E-09 | 2.03E-07 | 2.89E-05 |
| Fluviicola_B        | Echinicola_B          | 8.56E-01  | 2.86E-04 | 1.65E-02 | 2.17E-01 |
| Jonquetella_B       | Echinicola_B          | -8.40E-01 | 4.73E-04 | 2.61E-02 | 2.17E-01 |
| Lutaonella_B        | Echinicola_B          | 8.91E-01  | 7.15E-05 | 4.76E-03 | 6.01E-02 |
| Kordia_B            | Effluviibacter_B      | -8.27E-01 | 6.99E-04 | 3.65E-02 | 2.68E-01 |
| Labeledella_B       | Effluviibacter_B      | -8.27E-01 | 6.99E-04 | 3.65E-02 | 2.68E-01 |
| Nicoletella_B       | Effluviibacter_B      | -8.27E-01 | 6.99E-04 | 3.65E-02 | 2.68E-01 |
| Okibacterium_B      | Effluviibacter_B      | -8.27E-01 | 6.99E-04 | 3.65E-02 | 2.68E-01 |
| Parascardovia_B     | Effluviibacter_B      | -8.27E-01 | 6.99E-04 | 3.65E-02 | 2.68E-01 |
| Rhodovarius_B       | Effluviibacter_B      | -8.27E-01 | 6.99E-04 | 3.65E-02 | 2.68E-01 |
| Thermovenabulum_B   | Effluviibacter_B      | -8.27E-01 | 6.99E-04 | 3.65E-02 | 2.68E-01 |
| Xylanibacter_B      | Eggerthella_B         | -8.78E-01 | 1.25E-04 | 7.86E-03 | 6.06E-02 |
| Fastidiosipila_B    | Enterorhabdus_B       | 8.34E-01  | 5.73E-04 | 3.08E-02 | 2.17E-01 |
| Haloglycomyces_B    | Enterorhabdus_B       | -9.17E-01 | 1.75E-05 | 1.30E-03 | 7.84E-03 |
| Hespellia_B         | Enterorhabdus_B       | 9.14E-01  | 2.21E-05 | 1.59E-03 | 1.77E-02 |
| Microscilla_B       | Enterorhabdus_B       | -9.17E-01 | 1.75E-05 | 1.30E-03 | 7.84E-03 |
| Petrimonas_B        | Enterorhabdus_B       | -9.17E-01 | 1.75E-05 | 1.30E-03 | 7.84E-03 |
| Porphyromonas_B     | Enterorhabdus_B       | -9.17E-01 | 1.75E-05 | 1.30E-03 | 7.84E-03 |
| Propionibacterium_B | Enterorhabdus_B       | -9.17E-01 | 1.75E-05 | 1.30E-03 | 7.84E-03 |
| Pseudomonas_B       | Enterorhabdus_B       | -9.17E-01 | 1.75E-05 | 1.30E-03 | 7.84E-03 |
| Robinsoniella_B     | Enterorhabdus_B       | 8.32E-01  | 6.07E-04 | 3.24E-02 | 2.17E-01 |
| Sanguibacter_B      | Enterorhabdus_B       | -9.17E-01 | 1.75E-05 | 1.30E-03 | 7.84E-03 |
| Shuttleworthia_B    | Enterorhabdus_B       | 8.91E-01  | 7.24E-05 | 4.81E-03 | 6.01E-02 |
| Spirochaeta_B       | Enterorhabdus_B       | -9.17E-01 | 1.75E-05 | 1.30E-03 | 7.84E-03 |

|                               |                  |           |          |          |          |
|-------------------------------|------------------|-----------|----------|----------|----------|
| Syntrophococcus_B             | Enterorhabdus_B  | 8.21E-01  | 8.16E-04 | 4.16E-02 | 2.68E-01 |
| Turicibacter_B                | Enterorhabdus_B  | -8.66E-01 | 2.00E-04 | 1.19E-02 | 1.04E-01 |
| Fibrobacter_B                 | Eremococcus_B    | -8.30E-01 | 6.44E-04 | 3.40E-02 | 2.17E-01 |
| Flammeovirga_B                | Eremococcus_B    | 1.00E+00  | 2.22E-16 | 2.21E-14 | 1.90E-06 |
| Gracilimonas_B                | Eremococcus_B    | 1.00E+00  | 2.22E-16 | 2.21E-14 | 1.90E-06 |
| Halogeometricum_A             | Eremococcus_B    | 1.00E+00  | 2.22E-16 | 2.21E-14 | 1.90E-06 |
| Hydrogenobaculum_A            | Eremococcus_B    | 1.00E+00  | 2.22E-16 | 2.21E-14 | 1.90E-06 |
| Myceligenersans_B             | Eremococcus_B    | 1.00E+00  | 2.22E-16 | 2.21E-14 | 1.90E-06 |
| Otidea_F                      | Eremococcus_B    | 1.00E+00  | 2.22E-16 | 2.21E-14 | 1.90E-06 |
| Quatrionicoccus_B             | Eremococcus_B    | 1.00E+00  | 2.22E-16 | 2.21E-14 | 1.90E-06 |
| Roseospirillum_B              | Eremococcus_B    | 1.00E+00  | 2.22E-16 | 2.21E-14 | 1.90E-06 |
| Thermodesulfobium_B           | Eremococcus_B    | 1.00E+00  | 2.22E-16 | 2.21E-14 | 1.90E-06 |
| Yaniella_B                    | Eremococcus_B    | 1.00E+00  | 2.22E-16 | 2.21E-14 | 1.90E-06 |
| Filimonas_B                   | Erysipelothrix_B | -9.29E-01 | 8.34E-06 | 6.77E-04 | 7.84E-03 |
| Kineococcus_B                 | Erysipelothrix_B | -9.29E-01 | 8.34E-06 | 6.77E-04 | 7.84E-03 |
| Nesiotobacter_B               | Erysipelothrix_B | -9.29E-01 | 8.34E-06 | 6.77E-04 | 7.84E-03 |
| Oxalicibacterium_B            | Erysipelothrix_B | -9.29E-01 | 8.34E-06 | 6.77E-04 | 7.84E-03 |
| Paracoccus_B                  | Erysipelothrix_B | -9.29E-01 | 8.34E-06 | 6.77E-04 | 7.84E-03 |
| Paralactobacillus_B           | Erysipelothrix_B | -9.29E-01 | 8.34E-06 | 6.77E-04 | 7.84E-03 |
| Proteiniphilum_B              | Erysipelothrix_B | -9.29E-01 | 8.34E-06 | 6.77E-04 | 7.84E-03 |
| Psychrobacter_B               | Erysipelothrix_B | -9.29E-01 | 8.34E-06 | 6.77E-04 | 7.84E-03 |
| Sediminibacterium_B           | Erysipelothrix_B | -9.29E-01 | 8.34E-06 | 6.77E-04 | 7.84E-03 |
| Sediminicola_B                | Erysipelothrix_B | -8.18E-01 | 8.98E-04 | 4.51E-02 | 2.68E-01 |
| Selenomonas_B                 | Erysipelothrix_B | -9.29E-01 | 8.34E-06 | 6.77E-04 | 7.84E-03 |
| Stenoxybacter_B               | Erysipelothrix_B | -9.29E-01 | 8.34E-06 | 6.77E-04 | 7.84E-03 |
| Talaromyces_F                 | Erysipelothrix_B | -9.29E-01 | 8.34E-06 | 6.77E-04 | 7.84E-03 |
| unclassified_Pezizomycotina_F | Erysipelothrix_B | 9.29E-01  | 8.34E-06 | 6.77E-04 | 7.84E-03 |
| Howardella_B                  | Ethanoligenens_B | 8.57E-01  | 2.74E-04 | 1.59E-02 | 2.17E-01 |
| Hypocrea_F                    | Ethanoligenens_B | 8.46E-01  | 3.92E-04 | 2.21E-02 | 2.17E-01 |
| Thermogymnomonas_A            | Ethanoligenens_B | 8.93E-01  | 6.56E-05 | 4.39E-03 | 6.01E-02 |

|                            |                    |           |          |          |          |
|----------------------------|--------------------|-----------|----------|----------|----------|
| unclassified_B             | Ethanoligenens_B   | 8.64E-01  | 2.15E-04 | 1.27E-02 | 1.04E-01 |
| Hespellia_B                | Eubacterium_B      | 8.71E-01  | 1.63E-04 | 9.92E-03 | 1.04E-01 |
| Oribacterium_B             | Eubacterium_B      | 8.25E-01  | 7.37E-04 | 3.82E-02 | 2.68E-01 |
| Faecalibacterium_B         | Exilispira_B       | 8.15E-01  | 9.64E-04 | 4.78E-02 | 2.68E-01 |
| Lactovum_B                 | Exilispira_B       | 9.80E-01  | 1.12E-08 | 1.09E-06 | 2.87E-04 |
| Halalkalibacillus_B        | Fabibacter_B       | -9.60E-01 | 4.49E-07 | 4.13E-05 | 2.21E-03 |
| Zhangella_B                | Fabibacter_B       | -9.05E-01 | 3.57E-05 | 2.49E-03 | 4.17E-02 |
| Galbibacter_B              | Facklamia_B        | 1.00E+00  | 2.22E-16 | 2.21E-14 | 1.90E-06 |
| Lacticigenium_B            | Facklamia_B        | 1.00E+00  | 2.22E-16 | 2.21E-14 | 1.90E-06 |
| Methylobacterium_B         | Facklamia_B        | 1.00E+00  | 2.22E-16 | 2.21E-14 | 1.90E-06 |
| Ornithinimicrobium_B       | Facklamia_B        | 1.00E+00  | 2.22E-16 | 2.21E-14 | 1.90E-06 |
| Oxalophagus_B              | Facklamia_B        | -9.54E-01 | 8.65E-07 | 7.82E-05 | 2.81E-03 |
| Pseudozobellia_B           | Facklamia_B        | -9.16E-01 | 1.90E-05 | 1.39E-03 | 1.77E-02 |
| Rhodopila_B                | Facklamia_B        | 1.00E+00  | 2.22E-16 | 2.21E-14 | 1.90E-06 |
| Streptophyta_B             | Facklamia_B        | -9.16E-01 | 1.90E-05 | 1.39E-03 | 1.77E-02 |
| Trichococcus_B             | Facklamia_B        | 1.00E+00  | 2.22E-16 | 2.21E-14 | 1.90E-06 |
| Hydrogenoanaerobacterium_B | Faecalibacterium_B | 8.43E-01  | 4.31E-04 | 2.40E-02 | 2.17E-01 |
| Oscillibacter_B            | Fastidiosipila_B   | 9.12E-01  | 2.39E-05 | 1.71E-03 | 1.77E-02 |
| Persicitalea_B             | Fastidiosipila_B   | -8.80E-01 | 1.15E-04 | 7.30E-03 | 6.06E-02 |
| Solobacterium_B            | Fastidiosipila_B   | 8.37E-01  | 5.28E-04 | 2.87E-02 | 2.17E-01 |
| Xylanibacter_B             | Fastidiosipila_B   | 8.53E-01  | 3.15E-04 | 1.81E-02 | 2.17E-01 |
| Flammeovirga_B             | Fibrobacter_B      | -8.30E-01 | 6.44E-04 | 3.40E-02 | 2.17E-01 |
| Gracilimonas_B             | Fibrobacter_B      | -8.30E-01 | 6.44E-04 | 3.40E-02 | 2.17E-01 |
| Halogeometricum_A          | Fibrobacter_B      | -8.30E-01 | 6.44E-04 | 3.40E-02 | 2.17E-01 |
| Hydrogenobaculum_A         | Fibrobacter_B      | -8.30E-01 | 6.44E-04 | 3.40E-02 | 2.17E-01 |
| Myceligenersans_B          | Fibrobacter_B      | -8.30E-01 | 6.44E-04 | 3.40E-02 | 2.17E-01 |
| Otidea_F                   | Fibrobacter_B      | -8.30E-01 | 6.44E-04 | 3.40E-02 | 2.17E-01 |
| Quatrionicoccus_B          | Fibrobacter_B      | -8.30E-01 | 6.44E-04 | 3.40E-02 | 2.17E-01 |
| Roseospirillum_B           | Fibrobacter_B      | -8.30E-01 | 6.44E-04 | 3.40E-02 | 2.17E-01 |
| Thermodesulfobium_B        | Fibrobacter_B      | -8.30E-01 | 6.44E-04 | 3.40E-02 | 2.17E-01 |

|                               |                |           |          |          |          |
|-------------------------------|----------------|-----------|----------|----------|----------|
| Yaniella_B                    | Fibrobacter_B  | -8.30E-01 | 6.44E-04 | 3.40E-02 | 2.17E-01 |
| Kineococcus_B                 | Filimonas_B    | 1.00E+00  | 2.22E-16 | 2.21E-14 | 1.90E-06 |
| Nesiotobacter_B               | Filimonas_B    | 1.00E+00  | 2.22E-16 | 2.21E-14 | 1.90E-06 |
| Nubsella_B                    | Filimonas_B    | 8.16E-01  | 9.31E-04 | 4.65E-02 | 2.68E-01 |
| Oxalicibacterium_B            | Filimonas_B    | 1.00E+00  | 2.22E-16 | 2.21E-14 | 1.90E-06 |
| Paracoccus_B                  | Filimonas_B    | 1.00E+00  | 2.22E-16 | 2.21E-14 | 1.90E-06 |
| Paralactobacillus_B           | Filimonas_B    | 1.00E+00  | 2.22E-16 | 2.21E-14 | 1.90E-06 |
| Proteiniphilum_B              | Filimonas_B    | 1.00E+00  | 2.22E-16 | 2.21E-14 | 1.90E-06 |
| Psychrobacter_B               | Filimonas_B    | 1.00E+00  | 2.22E-16 | 2.21E-14 | 1.90E-06 |
| Sediminibacterium_B           | Filimonas_B    | 1.00E+00  | 2.22E-16 | 2.21E-14 | 1.90E-06 |
| Selenomonas_B                 | Filimonas_B    | 1.00E+00  | 2.22E-16 | 2.21E-14 | 1.90E-06 |
| Stenoxybacter_B               | Filimonas_B    | 1.00E+00  | 2.22E-16 | 2.21E-14 | 1.90E-06 |
| Talaromyces_F                 | Filimonas_B    | 1.00E+00  | 2.22E-16 | 2.21E-14 | 1.90E-06 |
| unclassified_Pezizomycotina_F | Filimonas_B    | -1.00E+00 | 2.22E-16 | 2.21E-14 | 1.90E-06 |
| Phocaeicola_B                 | Filobacillus_B | 8.43E-01  | 4.36E-04 | 2.43E-02 | 2.17E-01 |
| Gemmatimonas_B                | Filobasidium_F | -9.68E-01 | 1.35E-07 | 1.26E-05 | 5.68E-04 |
| Geosporobacter_B              | Filobasidium_F | 9.57E-01  | 6.20E-07 | 5.66E-05 | 2.21E-03 |
| Nocardioides_B                | Filobasidium_F | -9.68E-01 | 1.35E-07 | 1.26E-05 | 5.68E-04 |
| Olivibacter_B                 | Filobasidium_F | 8.67E-01  | 1.90E-04 | 1.14E-02 | 1.04E-01 |
| Pelomonas_B                   | Filobasidium_F | -9.68E-01 | 1.35E-07 | 1.26E-05 | 5.68E-04 |
| Unc_Kirschsteiniotelia_F      | Filobasidium_F | 9.68E-01  | 1.35E-07 | 1.26E-05 | 5.68E-04 |
| Verrucomicrobium_B            | Filobasidium_F | 8.63E-01  | 2.23E-04 | 1.31E-02 | 2.17E-01 |
| Garciella_B                   | Finegoldia_B   | 8.20E-01  | 8.41E-04 | 4.27E-02 | 2.68E-01 |
| Persicitalea_B                | Finegoldia_B   | -8.36E-01 | 5.41E-04 | 2.93E-02 | 2.17E-01 |
| Gracilimonas_B                | Flammeovirga_B | 1.00E+00  | 2.22E-16 | 2.21E-14 | 1.90E-06 |
| Halogeometricum_A             | Flammeovirga_B | 1.00E+00  | 2.22E-16 | 2.21E-14 | 1.90E-06 |
| Hydrogenobaculum_A            | Flammeovirga_B | 1.00E+00  | 2.22E-16 | 2.21E-14 | 1.90E-06 |
| Myceligenerans_B              | Flammeovirga_B | 1.00E+00  | 2.22E-16 | 2.21E-14 | 1.90E-06 |
| Otidea_F                      | Flammeovirga_B | 1.00E+00  | 2.22E-16 | 2.21E-14 | 1.90E-06 |
| Quatrionicoccus_B             | Flammeovirga_B | 1.00E+00  | 2.22E-16 | 2.21E-14 | 1.90E-06 |

|                      |                |           |          |          |          |
|----------------------|----------------|-----------|----------|----------|----------|
| Roseospirillum_B     | Flammeovirga_B | 1.00E+00  | 2.22E-16 | 2.21E-14 | 1.90E-06 |
| Thermodesulfobium_B  | Flammeovirga_B | 1.00E+00  | 2.22E-16 | 2.21E-14 | 1.90E-06 |
| Yaniella_B           | Flammeovirga_B | 1.00E+00  | 2.22E-16 | 2.21E-14 | 1.90E-06 |
| Lutaonella_B         | Fluviicola_B   | 8.58E-01  | 2.62E-04 | 1.53E-02 | 2.17E-01 |
| Fulvivirga_B         | Fulvimonas_B   | 1.00E+00  | 2.22E-16 | 2.21E-14 | 1.90E-06 |
| Jonesia_B            | Fulvimonas_B   | 1.00E+00  | 2.22E-16 | 2.21E-14 | 1.90E-06 |
| Lishizhenia_B        | Fulvimonas_B   | 1.00E+00  | 2.22E-16 | 2.21E-14 | 1.90E-06 |
| Ornithobacterium_B   | Fulvimonas_B   | -9.11E-01 | 2.50E-05 | 1.78E-03 | 3.13E-02 |
| Parachlamydia_B      | Fulvimonas_B   | 1.00E+00  | 2.22E-16 | 2.21E-14 | 1.90E-06 |
| Sphaerobacter_B      | Fulvimonas_B   | 1.00E+00  | 2.22E-16 | 2.21E-14 | 1.90E-06 |
| Sporanaerobacter_B   | Fulvimonas_B   | 1.00E+00  | 2.22E-16 | 2.21E-14 | 1.90E-06 |
| Unc_Kockovaella_F    | Fulvimonas_B   | 1.00E+00  | 2.22E-16 | 2.21E-14 | 1.90E-06 |
| Venenivibrio_B       | Fulvimonas_B   | 1.00E+00  | 2.22E-16 | 2.21E-14 | 1.90E-06 |
| Zunongwangia_B       | Fulvimonas_B   | 1.00E+00  | 2.22E-16 | 2.21E-14 | 1.90E-06 |
| Jonesia_B            | Fulvivirga_B   | 1.00E+00  | 2.22E-16 | 2.21E-14 | 1.90E-06 |
| Lishizhenia_B        | Fulvivirga_B   | 1.00E+00  | 2.22E-16 | 2.21E-14 | 1.90E-06 |
| Ornithobacterium_B   | Fulvivirga_B   | -9.11E-01 | 2.50E-05 | 1.78E-03 | 3.13E-02 |
| Parachlamydia_B      | Fulvivirga_B   | 1.00E+00  | 2.22E-16 | 2.21E-14 | 1.90E-06 |
| Sphaerobacter_B      | Fulvivirga_B   | 1.00E+00  | 2.22E-16 | 2.21E-14 | 1.90E-06 |
| Sporanaerobacter_B   | Fulvivirga_B   | 1.00E+00  | 2.22E-16 | 2.21E-14 | 1.90E-06 |
| Unc_Kockovaella_F    | Fulvivirga_B   | 1.00E+00  | 2.22E-16 | 2.21E-14 | 1.90E-06 |
| Venenivibrio_B       | Fulvivirga_B   | 1.00E+00  | 2.22E-16 | 2.21E-14 | 1.90E-06 |
| Zunongwangia_B       | Fulvivirga_B   | 1.00E+00  | 2.22E-16 | 2.21E-14 | 1.90E-06 |
| Hallella_B           | Fusibacter_B   | 8.92E-01  | 6.75E-05 | 4.51E-03 | 6.01E-02 |
| Parvimonas_B         | Fusibacter_B   | -9.47E-01 | 1.86E-06 | 1.63E-04 | 4.74E-03 |
| Ruminococcus_B       | Fusibacter_B   | 8.26E-01  | 7.17E-04 | 3.73E-02 | 2.68E-01 |
| Scytinostroma_F      | Fusibacter_B   | 1.00E+00  | 2.22E-16 | 2.21E-14 | 1.90E-06 |
| Lacticigenium_B      | Galbibacter_B  | 1.00E+00  | 2.22E-16 | 2.21E-14 | 1.90E-06 |
| Methylobacterium_B   | Galbibacter_B  | 1.00E+00  | 2.22E-16 | 2.21E-14 | 1.90E-06 |
| Ornithinimicrobium_B | Galbibacter_B  | 1.00E+00  | 2.22E-16 | 2.21E-14 | 1.90E-06 |

|                                     |                                     |           |          |          |          |
|-------------------------------------|-------------------------------------|-----------|----------|----------|----------|
| Oxalophagus_B                       | Galbibacter_B                       | -9.54E-01 | 8.65E-07 | 7.82E-05 | 2.81E-03 |
| Pseudozobellia_B                    | Galbibacter_B                       | -9.16E-01 | 1.90E-05 | 1.39E-03 | 1.77E-02 |
| Rhodopila_B                         | Galbibacter_B                       | 1.00E+00  | 2.22E-16 | 2.21E-14 | 1.90E-06 |
| Streptophyta_B                      | Galbibacter_B                       | -9.16E-01 | 1.90E-05 | 1.39E-03 | 1.77E-02 |
| Trichococcus_B                      | Galbibacter_B                       | 1.00E+00  | 2.22E-16 | 2.21E-14 | 1.90E-06 |
| Geosmithia_putterillii_sensu_Pitt_F | Ganoderma_F                         | -9.16E-01 | 1.90E-05 | 1.39E-03 | 1.77E-02 |
| Johnsonella_B                       | Ganoderma_F                         | 1.00E+00  | 2.22E-16 | 2.21E-14 | 1.90E-06 |
| Leptonema_B                         | Ganoderma_F                         | 1.00E+00  | 2.22E-16 | 2.21E-14 | 1.90E-06 |
| Lutimonas_B                         | Ganoderma_F                         | 1.00E+00  | 2.22E-16 | 2.21E-14 | 1.90E-06 |
| Massilia_B                          | Ganoderma_F                         | 1.00E+00  | 2.22E-16 | 2.21E-14 | 1.90E-06 |
| Parasegetibacter_B                  | Ganoderma_F                         | -9.42E-01 | 2.86E-06 | 2.46E-04 | 7.84E-03 |
| Schwartzia_B                        | Ganoderma_F                         | -9.26E-01 | 9.83E-06 | 7.85E-04 | 7.84E-03 |
| Tepidanaerobacter_B                 | Ganoderma_F                         | 1.00E+00  | 2.22E-16 | 2.21E-14 | 1.90E-06 |
| Thermoflavimicrobium_B              | Ganoderma_F                         | 1.00E+00  | 2.22E-16 | 2.21E-14 | 1.90E-06 |
| Unc_Verticillium_F                  | Ganoderma_F                         | 1.00E+00  | 2.22E-16 | 2.21E-14 | 1.90E-06 |
| Kiloniella_B                        | Garciella_B                         | -8.42E-01 | 4.44E-04 | 2.47E-02 | 2.17E-01 |
| Oribacterium_B                      | Garciella_B                         | 8.34E-01  | 5.64E-04 | 3.04E-02 | 2.17E-01 |
| Pelospora_B                         | Garciella_B                         | 8.23E-01  | 7.84E-04 | 4.03E-02 | 2.68E-01 |
| Proteiniborus_B                     | Garciella_B                         | 8.24E-01  | 7.66E-04 | 3.95E-02 | 2.68E-01 |
| Stenotrophomonas_B                  | Garciella_B                         | -8.42E-01 | 4.44E-04 | 2.47E-02 | 2.17E-01 |
| Geosporobacter_B                    | Gemmatimonas_B                      | -9.12E-01 | 2.43E-05 | 1.74E-03 | 1.77E-02 |
| Nocardioides_B                      | Gemmatimonas_B                      | 1.00E+00  | 2.22E-16 | 2.21E-14 | 1.90E-06 |
| Olivibacter_B                       | Gemmatimonas_B                      | -9.17E-01 | 1.75E-05 | 1.30E-03 | 7.84E-03 |
| Pelomonas_B                         | Gemmatimonas_B                      | 1.00E+00  | 2.22E-16 | 2.21E-14 | 1.90E-06 |
| Unc_Kirschsteiniiothelia_F          | Gemmatimonas_B                      | -1.00E+00 | 2.22E-16 | 2.21E-14 | 1.90E-06 |
| Verrucomicrobium_B                  | Gemmatimonas_B                      | -8.93E-01 | 6.47E-05 | 4.33E-03 | 6.01E-02 |
| Leucobacter_B                       | Geopsychrobacter_B                  | -9.68E-01 | 1.43E-07 | 1.33E-05 | 1.35E-03 |
| Wolinella_B                         | Geopsychrobacter_B                  | 8.45E-01  | 4.04E-04 | 2.27E-02 | 2.17E-01 |
| Johnsonella_B                       | Geosmithia_putterillii_sensu_Pitt_F | -9.16E-01 | 1.90E-05 | 1.39E-03 | 1.77E-02 |
| Kaistella_B                         | Geosmithia_putterillii_sensu_Pitt_F | 8.35E-01  | 5.53E-04 | 2.99E-02 | 2.17E-01 |

|                          |                                     |           |          |          |          |
|--------------------------|-------------------------------------|-----------|----------|----------|----------|
| Leptonema_B              | Geosmithia_putterillii_sensu_Pitt_F | -9.16E-01 | 1.90E-05 | 1.39E-03 | 1.77E-02 |
| Lutimonas_B              | Geosmithia_putterillii_sensu_Pitt_F | -9.16E-01 | 1.90E-05 | 1.39E-03 | 1.77E-02 |
| Massilia_B               | Geosmithia_putterillii_sensu_Pitt_F | -9.16E-01 | 1.90E-05 | 1.39E-03 | 1.77E-02 |
| Parasegetibacter_B       | Geosmithia_putterillii_sensu_Pitt_F | 8.77E-01  | 1.27E-04 | 7.96E-03 | 6.06E-02 |
| Schwartzia_B             | Geosmithia_putterillii_sensu_Pitt_F | 9.57E-01  | 6.28E-07 | 5.73E-05 | 2.21E-03 |
| Tepidanaerobacter_B      | Geosmithia_putterillii_sensu_Pitt_F | -9.16E-01 | 1.90E-05 | 1.39E-03 | 1.77E-02 |
| Thermoflavimicrobium_B   | Geosmithia_putterillii_sensu_Pitt_F | -9.16E-01 | 1.90E-05 | 1.39E-03 | 1.77E-02 |
| Unc_Verticillium_F       | Geosmithia_putterillii_sensu_Pitt_F | -9.16E-01 | 1.90E-05 | 1.39E-03 | 1.77E-02 |
| Nocardioides_B           | Geosporobacter_B                    | -9.12E-01 | 2.43E-05 | 1.74E-03 | 1.77E-02 |
| Pelomonas_B              | Geosporobacter_B                    | -9.12E-01 | 2.43E-05 | 1.74E-03 | 1.77E-02 |
| Unc_Kirschsteiniotelia_F | Geosporobacter_B                    | 9.12E-01  | 2.43E-05 | 1.74E-03 | 1.77E-02 |
| Verrucomicrobium_B       | Geosporobacter_B                    | 8.34E-01  | 5.68E-04 | 3.06E-02 | 2.17E-01 |
| Subdoligranulum_B        | Globicatella_B                      | -8.37E-01 | 5.25E-04 | 2.86E-02 | 2.17E-01 |
| Halogeometricum_A        | Gracilimonas_B                      | 1.00E+00  | 2.22E-16 | 2.21E-14 | 1.90E-06 |
| Hydrogenobaculum_A       | Gracilimonas_B                      | 1.00E+00  | 2.22E-16 | 2.21E-14 | 1.90E-06 |
| Myceligenersans_B        | Gracilimonas_B                      | 1.00E+00  | 2.22E-16 | 2.21E-14 | 1.90E-06 |
| Otidea_F                 | Gracilimonas_B                      | 1.00E+00  | 2.22E-16 | 2.21E-14 | 1.90E-06 |
| Quatrionicoccus_B        | Gracilimonas_B                      | 1.00E+00  | 2.22E-16 | 2.21E-14 | 1.90E-06 |
| Roseospirillum_B         | Gracilimonas_B                      | 1.00E+00  | 2.22E-16 | 2.21E-14 | 1.90E-06 |
| Thermodesulfobium_B      | Gracilimonas_B                      | 1.00E+00  | 2.22E-16 | 2.21E-14 | 1.90E-06 |
| Yaniella_B               | Gracilimonas_B                      | 1.00E+00  | 2.22E-16 | 2.21E-14 | 1.90E-06 |
| Lentisphaera_B           | Guggenheimella_B                    | -9.72E-01 | 6.40E-08 | 6.11E-06 | 2.87E-04 |
| Sedimentibacter_B        | Guggenheimella_B                    | 9.27E-01  | 9.35E-06 | 7.50E-04 | 7.84E-03 |
| unclassified_B           | Guggenheimella_B                    | 8.94E-01  | 6.17E-05 | 4.15E-03 | 6.01E-02 |
| Xylanibacter_B           | Guggenheimella_B                    | 8.70E-01  | 1.68E-04 | 1.02E-02 | 1.04E-01 |
| Larkinella_B             | Haliscomenobacter_B                 | -8.36E-01 | 5.41E-04 | 2.93E-02 | 2.17E-01 |
| Parabacteroides_B        | Haliscomenobacter_B                 | 8.36E-01  | 5.41E-04 | 2.93E-02 | 2.17E-01 |
| Sporobacter_B            | Haliscomenobacter_B                 | -8.94E-01 | 6.29E-05 | 4.22E-03 | 6.01E-02 |
| Howardella_B             | Hallella_B                          | 8.79E-01  | 1.20E-04 | 7.57E-03 | 6.06E-02 |
| Pseudobutyrvibrio_B      | Hallella_B                          | 8.28E-01  | 6.76E-04 | 3.55E-02 | 2.17E-01 |

|                     |                   |           |          |          |          |
|---------------------|-------------------|-----------|----------|----------|----------|
| Ruminococcus_B      | Hallella_B        | 9.21E-01  | 1.36E-05 | 1.05E-03 | 7.84E-03 |
| Scytinostroma_F     | Hallella_B        | 8.92E-01  | 6.75E-05 | 4.51E-03 | 6.01E-02 |
| Thermogymnomonas_A  | Hallella_B        | 8.43E-01  | 4.40E-04 | 2.45E-02 | 2.17E-01 |
| Hydrogenobaculum_A  | Halogeometricum_A | 1.00E+00  | 2.22E-16 | 2.21E-14 | 1.90E-06 |
| Myceligenerans_B    | Halogeometricum_A | 1.00E+00  | 2.22E-16 | 2.21E-14 | 1.90E-06 |
| Otidea_F            | Halogeometricum_A | 1.00E+00  | 2.22E-16 | 2.21E-14 | 1.90E-06 |
| Quatronicoccus_B    | Halogeometricum_A | 1.00E+00  | 2.22E-16 | 2.21E-14 | 1.90E-06 |
| Roseospirillum_B    | Halogeometricum_A | 1.00E+00  | 2.22E-16 | 2.21E-14 | 1.90E-06 |
| Thermodesulfobium_B | Halogeometricum_A | 1.00E+00  | 2.22E-16 | 2.21E-14 | 1.90E-06 |
| Yaniella_B          | Halogeometricum_A | 1.00E+00  | 2.22E-16 | 2.21E-14 | 1.90E-06 |
| Hespellia_B         | Haloglycomyces_B  | -9.70E-01 | 1.04E-07 | 9.77E-06 | 3.19E-04 |
| Microscilla_B       | Haloglycomyces_B  | 1.00E+00  | 2.22E-16 | 2.21E-14 | 1.90E-06 |
| Petrimonas_B        | Haloglycomyces_B  | 1.00E+00  | 2.22E-16 | 2.21E-14 | 1.90E-06 |
| Porphyromonas_B     | Haloglycomyces_B  | 1.00E+00  | 2.22E-16 | 2.21E-14 | 1.90E-06 |
| Propionibacterium_B | Haloglycomyces_B  | 1.00E+00  | 2.22E-16 | 2.21E-14 | 1.90E-06 |
| Pseudomonas_B       | Haloglycomyces_B  | 1.00E+00  | 2.22E-16 | 2.21E-14 | 1.90E-06 |
| Sanguibacter_B      | Haloglycomyces_B  | 1.00E+00  | 2.22E-16 | 2.21E-14 | 1.90E-06 |
| Shuttleworthia_B    | Haloglycomyces_B  | -8.88E-01 | 8.23E-05 | 5.41E-03 | 6.01E-02 |
| Spirochaeta_B       | Haloglycomyces_B  | 1.00E+00  | 2.22E-16 | 2.21E-14 | 1.90E-06 |
| unclassified_F      | Haloglycomyces_B  | -8.44E-01 | 4.25E-04 | 2.37E-02 | 2.17E-01 |
| Lactonifactor_B     | Hespellia_B       | 8.43E-01  | 4.32E-04 | 2.41E-02 | 2.17E-01 |
| Microscilla_B       | Hespellia_B       | -9.70E-01 | 1.04E-07 | 9.77E-06 | 3.19E-04 |
| Petrimonas_B        | Hespellia_B       | -9.70E-01 | 1.04E-07 | 9.77E-06 | 3.19E-04 |
| Porphyromonas_B     | Hespellia_B       | -9.70E-01 | 1.04E-07 | 9.77E-06 | 3.19E-04 |
| Propionibacterium_B | Hespellia_B       | -9.70E-01 | 1.04E-07 | 9.77E-06 | 3.19E-04 |
| Pseudomonas_B       | Hespellia_B       | -9.70E-01 | 1.04E-07 | 9.77E-06 | 3.19E-04 |
| Sanguibacter_B      | Hespellia_B       | -9.70E-01 | 1.04E-07 | 9.77E-06 | 3.19E-04 |
| Shuttleworthia_B    | Hespellia_B       | 8.76E-01  | 1.36E-04 | 8.47E-03 | 7.38E-02 |
| Spirochaeta_B       | Hespellia_B       | -9.70E-01 | 1.04E-07 | 9.77E-06 | 3.19E-04 |
| Syntrophococcus_B   | Hespellia_B       | 8.25E-01  | 7.42E-04 | 3.84E-02 | 2.68E-01 |

|                         |                            |           |          |          |          |
|-------------------------|----------------------------|-----------|----------|----------|----------|
| Turicibacter_B          | Hippea_B                   | -8.20E-01 | 8.54E-04 | 4.33E-02 | 2.68E-01 |
| Leuconostoc_B           | Holtermannia_F             | 1.00E+00  | 2.22E-16 | 2.21E-14 | 1.90E-06 |
| Levilinea_B             | Holtermannia_F             | -9.17E-01 | 1.75E-05 | 1.30E-03 | 7.84E-03 |
| Parasporobacterium_B    | Holtermannia_F             | 8.63E-01  | 2.19E-04 | 1.29E-02 | 2.17E-01 |
| Phascolarctobacterium_B | Holtermannia_F             | 1.00E+00  | 2.22E-16 | 2.21E-14 | 1.90E-06 |
| Pirellula_B             | Holtermannia_F             | 1.00E+00  | 2.22E-16 | 2.21E-14 | 1.90E-06 |
| Rhodopirellula_B        | Holtermannia_F             | -8.76E-01 | 1.33E-04 | 8.28E-03 | 7.38E-02 |
| Rudanella_B             | Holtermannia_F             | 1.00E+00  | 2.22E-16 | 2.21E-14 | 1.90E-06 |
| Thermonema_B            | Holtermannia_F             | 1.00E+00  | 2.22E-16 | 2.21E-14 | 1.90E-06 |
| Tropheryma_B            | Holtermannia_F             | 1.00E+00  | 2.22E-16 | 2.21E-14 | 1.90E-06 |
| Unc_Cryptococcus_F      | Holtermannia_F             | 1.00E+00  | 2.22E-16 | 2.21E-14 | 1.90E-06 |
| Verminephrobacter_B     | Holtermannia_F             | 1.00E+00  | 2.22E-16 | 2.21E-14 | 1.90E-06 |
| Ruminococcus_B          | Howardella_B               | 8.45E-01  | 4.02E-04 | 2.26E-02 | 2.17E-01 |
| Thermogymnomonas_A      | Howardella_B               | 9.77E-01  | 2.47E-08 | 2.39E-06 | 2.87E-04 |
| Succiniclasticum_B      | Hydrogenoanaerobacterium_B | 8.56E-01  | 2.79E-04 | 1.62E-02 | 2.17E-01 |
| Myceligenerans_B        | Hydrogenobaculum_A         | 1.00E+00  | 2.22E-16 | 2.21E-14 | 1.90E-06 |
| Otidea_F                | Hydrogenobaculum_A         | 1.00E+00  | 2.22E-16 | 2.21E-14 | 1.90E-06 |
| Quatrionicoccus_B       | Hydrogenobaculum_A         | 1.00E+00  | 2.22E-16 | 2.21E-14 | 1.90E-06 |
| Roseospirillum_B        | Hydrogenobaculum_A         | 1.00E+00  | 2.22E-16 | 2.21E-14 | 1.90E-06 |
| Thermodesulfobium_B     | Hydrogenobaculum_A         | 1.00E+00  | 2.22E-16 | 2.21E-14 | 1.90E-06 |
| Yaniella_B              | Hydrogenobaculum_A         | 1.00E+00  | 2.22E-16 | 2.21E-14 | 1.90E-06 |
| Lycoperdon_F            | Hypocrea_F                 | 8.13E-01  | 1.01E-03 | 4.95E-02 | 2.68E-01 |
| Schlesneria_B           | Isobaculum_B               | -9.54E-01 | 8.47E-07 | 7.66E-05 | 2.21E-03 |
| Leptonema_B             | Johnsonella_B              | 1.00E+00  | 2.22E-16 | 2.21E-14 | 1.90E-06 |
| Lutimonas_B             | Johnsonella_B              | 1.00E+00  | 2.22E-16 | 2.21E-14 | 1.90E-06 |
| Massilia_B              | Johnsonella_B              | 1.00E+00  | 2.22E-16 | 2.21E-14 | 1.90E-06 |
| Parasegetibacter_B      | Johnsonella_B              | -9.42E-01 | 2.86E-06 | 2.46E-04 | 7.84E-03 |
| Schwartzia_B            | Johnsonella_B              | -9.26E-01 | 9.83E-06 | 7.85E-04 | 7.84E-03 |
| Tepidanaerobacter_B     | Johnsonella_B              | 1.00E+00  | 2.22E-16 | 2.21E-14 | 1.90E-06 |
| Thermoflavimicrobium_B  | Johnsonella_B              | 1.00E+00  | 2.22E-16 | 2.21E-14 | 1.90E-06 |

|                               |               |           |          |          |          |
|-------------------------------|---------------|-----------|----------|----------|----------|
| Unc_Verticillium_F            | Johnsonella_B | 1.00E+00  | 2.22E-16 | 2.21E-14 | 1.90E-06 |
| Lishizhenia_B                 | Jonesia_B     | 1.00E+00  | 2.22E-16 | 2.21E-14 | 1.90E-06 |
| Ornithobacterium_B            | Jonesia_B     | -9.11E-01 | 2.50E-05 | 1.78E-03 | 3.13E-02 |
| Parachlamydia_B               | Jonesia_B     | 1.00E+00  | 2.22E-16 | 2.21E-14 | 1.90E-06 |
| Sphaerobacter_B               | Jonesia_B     | 1.00E+00  | 2.22E-16 | 2.21E-14 | 1.90E-06 |
| Sporanaerobacter_B            | Jonesia_B     | 1.00E+00  | 2.22E-16 | 2.21E-14 | 1.90E-06 |
| Unc_Kockovaella_F             | Jonesia_B     | 1.00E+00  | 2.22E-16 | 2.21E-14 | 1.90E-06 |
| Venenivibrio_B                | Jonesia_B     | 1.00E+00  | 2.22E-16 | 2.21E-14 | 1.90E-06 |
| Zunongwangia_B                | Jonesia_B     | 1.00E+00  | 2.22E-16 | 2.21E-14 | 1.90E-06 |
| Pedobacter_B                  | Jonquetella_B | -8.30E-01 | 6.37E-04 | 3.37E-02 | 2.17E-01 |
| unclassified_F                | Jonquetella_B | 8.93E-01  | 6.38E-05 | 4.28E-03 | 6.01E-02 |
| Peptococcus_B                 | Kaistella_B   | 8.41E-01  | 4.61E-04 | 2.55E-02 | 2.17E-01 |
| Oribacterium_B                | Kiloniella_B  | -9.07E-01 | 3.17E-05 | 2.22E-03 | 3.13E-02 |
| Pelospora_B                   | Kiloniella_B  | -9.38E-01 | 3.98E-06 | 3.38E-04 | 7.84E-03 |
| Sporobacterium_B              | Kiloniella_B  | -9.77E-01 | 2.32E-08 | 2.25E-06 | 2.87E-04 |
| Stenotrophomonas_B            | Kiloniella_B  | 1.00E+00  | 2.22E-16 | 2.21E-14 | 1.90E-06 |
| Nesiotobacter_B               | Kineococcus_B | 1.00E+00  | 2.22E-16 | 2.21E-14 | 1.90E-06 |
| Nubsella_B                    | Kineococcus_B | 8.16E-01  | 9.31E-04 | 4.65E-02 | 2.68E-01 |
| Oxalicibacterium_B            | Kineococcus_B | 1.00E+00  | 2.22E-16 | 2.21E-14 | 1.90E-06 |
| Paracoccus_B                  | Kineococcus_B | 1.00E+00  | 2.22E-16 | 2.21E-14 | 1.90E-06 |
| Paralactobacillus_B           | Kineococcus_B | 1.00E+00  | 2.22E-16 | 2.21E-14 | 1.90E-06 |
| Proteiniphilum_B              | Kineococcus_B | 1.00E+00  | 2.22E-16 | 2.21E-14 | 1.90E-06 |
| Psychrobacter_B               | Kineococcus_B | 1.00E+00  | 2.22E-16 | 2.21E-14 | 1.90E-06 |
| Sediminibacterium_B           | Kineococcus_B | 1.00E+00  | 2.22E-16 | 2.21E-14 | 1.90E-06 |
| Selenomonas_B                 | Kineococcus_B | 1.00E+00  | 2.22E-16 | 2.21E-14 | 1.90E-06 |
| Stenoxybacter_B               | Kineococcus_B | 1.00E+00  | 2.22E-16 | 2.21E-14 | 1.90E-06 |
| Talaromyces_F                 | Kineococcus_B | 1.00E+00  | 2.22E-16 | 2.21E-14 | 1.90E-06 |
| unclassified_Pezizomycotina_F | Kineococcus_B | -1.00E+00 | 2.22E-16 | 2.21E-14 | 1.90E-06 |
| Labeledella_B                 | Kordia_B      | 1.00E+00  | 2.22E-16 | 2.21E-14 | 1.90E-06 |
| Nicoletella_B                 | Kordia_B      | 1.00E+00  | 2.22E-16 | 2.21E-14 | 1.90E-06 |

|                          |                 |           |          |          |          |
|--------------------------|-----------------|-----------|----------|----------|----------|
| Okibacterium_B           | Kordia_B        | 1.00E+00  | 2.22E-16 | 2.21E-14 | 1.90E-06 |
| Olsenella_B              | Kordia_B        | -9.47E-01 | 1.78E-06 | 1.57E-04 | 2.81E-03 |
| Parascardovia_B          | Kordia_B        | 1.00E+00  | 2.22E-16 | 2.21E-14 | 1.90E-06 |
| Rhodovarius_B            | Kordia_B        | 1.00E+00  | 2.22E-16 | 2.21E-14 | 1.90E-06 |
| Slackia_B                | Kordia_B        | -9.07E-01 | 3.20E-05 | 2.25E-03 | 4.17E-02 |
| Thermovenabulum_B        | Kordia_B        | 1.00E+00  | 2.22E-16 | 2.21E-14 | 1.90E-06 |
| Shuttleworthia_B         | Kosmotoga_B     | -8.48E-01 | 3.74E-04 | 2.12E-02 | 2.17E-01 |
| Nicoletella_B            | Labeledella_B   | 1.00E+00  | 2.22E-16 | 2.21E-14 | 1.90E-06 |
| Okibacterium_B           | Labeledella_B   | 1.00E+00  | 2.22E-16 | 2.21E-14 | 1.90E-06 |
| Olsenella_B              | Labeledella_B   | -9.47E-01 | 1.78E-06 | 1.57E-04 | 2.81E-03 |
| Parascardovia_B          | Labeledella_B   | 1.00E+00  | 2.22E-16 | 2.21E-14 | 1.90E-06 |
| Rhodovarius_B            | Labeledella_B   | 1.00E+00  | 2.22E-16 | 2.21E-14 | 1.90E-06 |
| Slackia_B                | Labeledella_B   | -9.07E-01 | 3.20E-05 | 2.25E-03 | 4.17E-02 |
| Thermovenabulum_B        | Labeledella_B   | 1.00E+00  | 2.22E-16 | 2.21E-14 | 1.90E-06 |
| Methylobacterium_B       | Lacticigenium_B | 1.00E+00  | 2.22E-16 | 2.21E-14 | 1.90E-06 |
| Ornithinimicrobium_B     | Lacticigenium_B | 1.00E+00  | 2.22E-16 | 2.21E-14 | 1.90E-06 |
| Oxalophagus_B            | Lacticigenium_B | -9.54E-01 | 8.65E-07 | 7.82E-05 | 2.81E-03 |
| Pseudozobellia_B         | Lacticigenium_B | -9.16E-01 | 1.90E-05 | 1.39E-03 | 1.77E-02 |
| Rhodopila_B              | Lacticigenium_B | 1.00E+00  | 2.22E-16 | 2.21E-14 | 1.90E-06 |
| Streptophyta_B           | Lacticigenium_B | -9.16E-01 | 1.90E-05 | 1.39E-03 | 1.77E-02 |
| Trichococcus_B           | Lacticigenium_B | 1.00E+00  | 2.22E-16 | 2.21E-14 | 1.90E-06 |
| Papillibacter_B          | Lactonifactor_B | 8.77E-01  | 1.30E-04 | 8.14E-03 | 6.06E-02 |
| Pseudosphingobacterium_B | Lactonifactor_B | 8.42E-01  | 4.49E-04 | 2.49E-02 | 2.17E-01 |
| Sharpea_B                | Lactonifactor_B | 9.33E-01  | 6.21E-06 | 5.15E-04 | 7.84E-03 |
| Sporobacter_B            | Larkinella_B    | 8.31E-01  | 6.19E-04 | 3.29E-02 | 2.17E-01 |
| Leucobacter_B            | Lawsonia_B      | -8.32E-01 | 6.04E-04 | 3.22E-02 | 2.17E-01 |
| Rapidithrix_B            | Lawsonia_B      | -9.50E-01 | 1.37E-06 | 1.22E-04 | 2.81E-03 |
| Solibacillus_B           | Lawsonia_B      | -9.50E-01 | 1.37E-06 | 1.22E-04 | 2.81E-03 |
| Microbacterium_B         | Leifsonia_B     | 9.88E-01  | 1.05E-09 | 1.02E-07 | 2.81E-05 |
| Sedimentibacter_B        | Lentisphaera_B  | -9.54E-01 | 8.47E-07 | 7.66E-05 | 2.21E-03 |

|                         |                  |           |          |          |          |
|-------------------------|------------------|-----------|----------|----------|----------|
| Xylanibacter_B          | Lentisphaera_B   | -8.20E-01 | 8.40E-04 | 4.26E-02 | 2.68E-01 |
| Microbacterium_B        | Leptobacterium_B | -8.50E-01 | 3.48E-04 | 1.98E-02 | 2.17E-01 |
| Peptostreptococcus_B    | Leptobacterium_B | 8.95E-01  | 5.91E-05 | 3.98E-03 | 6.01E-02 |
| Selenihalanaerobacter_B | Leptobacterium_B | -9.66E-01 | 1.81E-07 | 1.68E-05 | 1.35E-03 |
| Lutimonas_B             | Leptonema_B      | 1.00E+00  | 2.22E-16 | 2.21E-14 | 1.90E-06 |
| Massilia_B              | Leptonema_B      | 1.00E+00  | 2.22E-16 | 2.21E-14 | 1.90E-06 |
| Parasegetibacter_B      | Leptonema_B      | -9.42E-01 | 2.86E-06 | 2.46E-04 | 7.84E-03 |
| Schwartzia_B            | Leptonema_B      | -9.26E-01 | 9.83E-06 | 7.85E-04 | 7.84E-03 |
| Tepidanaerobacter_B     | Leptonema_B      | 1.00E+00  | 2.22E-16 | 2.21E-14 | 1.90E-06 |
| Thermoflavimicrobium_B  | Leptonema_B      | 1.00E+00  | 2.22E-16 | 2.21E-14 | 1.90E-06 |
| Unc_Verticillium_F      | Leptonema_B      | 1.00E+00  | 2.22E-16 | 2.21E-14 | 1.90E-06 |
| Wolinella_B             | Leucobacter_B    | -8.46E-01 | 3.93E-04 | 2.21E-02 | 2.17E-01 |
| Levilinea_B             | Leuconostoc_B    | -9.17E-01 | 1.75E-05 | 1.30E-03 | 7.84E-03 |
| Parasporobacterium_B    | Leuconostoc_B    | 8.63E-01  | 2.19E-04 | 1.29E-02 | 2.17E-01 |
| Phascolarctobacterium_B | Leuconostoc_B    | 1.00E+00  | 2.22E-16 | 2.21E-14 | 1.90E-06 |
| Pirellula_B             | Leuconostoc_B    | 1.00E+00  | 2.22E-16 | 2.21E-14 | 1.90E-06 |
| Rhodopirellula_B        | Leuconostoc_B    | -8.76E-01 | 1.33E-04 | 8.28E-03 | 7.38E-02 |
| Rudanella_B             | Leuconostoc_B    | 1.00E+00  | 2.22E-16 | 2.21E-14 | 1.90E-06 |
| Thermonema_B            | Leuconostoc_B    | 1.00E+00  | 2.22E-16 | 2.21E-14 | 1.90E-06 |
| Tropheryma_B            | Leuconostoc_B    | 1.00E+00  | 2.22E-16 | 2.21E-14 | 1.90E-06 |
| Unc_Cryptococcus_F      | Leuconostoc_B    | 1.00E+00  | 2.22E-16 | 2.21E-14 | 1.90E-06 |
| Verminephrobacter_B     | Leuconostoc_B    | 1.00E+00  | 2.22E-16 | 2.21E-14 | 1.90E-06 |
| Phascolarctobacterium_B | Levilinea_B      | -9.17E-01 | 1.75E-05 | 1.30E-03 | 7.84E-03 |
| Pirellula_B             | Levilinea_B      | -9.17E-01 | 1.75E-05 | 1.30E-03 | 7.84E-03 |
| Rudanella_B             | Levilinea_B      | -9.17E-01 | 1.75E-05 | 1.30E-03 | 7.84E-03 |
| Thermonema_B            | Levilinea_B      | -9.17E-01 | 1.75E-05 | 1.30E-03 | 7.84E-03 |
| Tropheryma_B            | Levilinea_B      | -9.17E-01 | 1.75E-05 | 1.30E-03 | 7.84E-03 |
| Unc_Cryptococcus_F      | Levilinea_B      | -9.17E-01 | 1.75E-05 | 1.30E-03 | 7.84E-03 |
| Verminephrobacter_B     | Levilinea_B      | -9.17E-01 | 1.75E-05 | 1.30E-03 | 7.84E-03 |
| Persicitalea_B          | Limibacter_B     | -8.39E-01 | 4.90E-04 | 2.69E-02 | 2.17E-01 |

|                         |                      |           |          |          |          |
|-------------------------|----------------------|-----------|----------|----------|----------|
| Ornithobacterium_B      | Lishizhenia_B        | -9.11E-01 | 2.50E-05 | 1.78E-03 | 3.13E-02 |
| Parachlamydia_B         | Lishizhenia_B        | 1.00E+00  | 2.22E-16 | 2.21E-14 | 1.90E-06 |
| Sphaerobacter_B         | Lishizhenia_B        | 1.00E+00  | 2.22E-16 | 2.21E-14 | 1.90E-06 |
| Sporanaerobacter_B      | Lishizhenia_B        | 1.00E+00  | 2.22E-16 | 2.21E-14 | 1.90E-06 |
| Unc_Kockovaella_F       | Lishizhenia_B        | 1.00E+00  | 2.22E-16 | 2.21E-14 | 1.90E-06 |
| Venenivibrio_B          | Lishizhenia_B        | 1.00E+00  | 2.22E-16 | 2.21E-14 | 1.90E-06 |
| Zunongwangia_B          | Lishizhenia_B        | 1.00E+00  | 2.22E-16 | 2.21E-14 | 1.90E-06 |
| Massilia_B              | Lutimonas_B          | 1.00E+00  | 2.22E-16 | 2.21E-14 | 1.90E-06 |
| Parasegetibacter_B      | Lutimonas_B          | -9.42E-01 | 2.86E-06 | 2.46E-04 | 7.84E-03 |
| Schwartzia_B            | Lutimonas_B          | -9.26E-01 | 9.83E-06 | 7.85E-04 | 7.84E-03 |
| Tepidanaerobacter_B     | Lutimonas_B          | 1.00E+00  | 2.22E-16 | 2.21E-14 | 1.90E-06 |
| Thermoflavimicrobium_B  | Lutimonas_B          | 1.00E+00  | 2.22E-16 | 2.21E-14 | 1.90E-06 |
| Unc_Verticillium_F      | Lutimonas_B          | 1.00E+00  | 2.22E-16 | 2.21E-14 | 1.90E-06 |
| Marvinbryantia_B        | Lycoperdon_F         | 9.24E-01  | 1.12E-05 | 8.81E-04 | 7.84E-03 |
| unclassified_B          | Lycoperdon_F         | 8.33E-01  | 5.90E-04 | 3.16E-02 | 2.17E-01 |
| Thermicanus_B           | Malonomonas_B        | 8.31E-01  | 6.29E-04 | 3.34E-02 | 2.17E-01 |
| Parasegetibacter_B      | Massilia_B           | -9.42E-01 | 2.86E-06 | 2.46E-04 | 7.84E-03 |
| Schwartzia_B            | Massilia_B           | -9.26E-01 | 9.83E-06 | 7.85E-04 | 7.84E-03 |
| Tepidanaerobacter_B     | Massilia_B           | 1.00E+00  | 2.22E-16 | 2.21E-14 | 1.90E-06 |
| Thermoflavimicrobium_B  | Massilia_B           | 1.00E+00  | 2.22E-16 | 2.21E-14 | 1.90E-06 |
| Unc_Verticillium_F      | Massilia_B           | 1.00E+00  | 2.22E-16 | 2.21E-14 | 1.90E-06 |
| Terasakiella_B          | Methanobrevibacter_A | -8.92E-01 | 6.90E-05 | 4.60E-03 | 6.01E-02 |
| Ornithinimicrobium_B    | Methylobacterium_B   | 1.00E+00  | 2.22E-16 | 2.21E-14 | 1.90E-06 |
| Oxalophagus_B           | Methylobacterium_B   | -9.54E-01 | 8.65E-07 | 7.82E-05 | 2.81E-03 |
| Pseudozobellia_B        | Methylobacterium_B   | -9.16E-01 | 1.90E-05 | 1.39E-03 | 1.77E-02 |
| Rhodopila_B             | Methylobacterium_B   | 1.00E+00  | 2.22E-16 | 2.21E-14 | 1.90E-06 |
| Streptophyta_B          | Methylobacterium_B   | -9.16E-01 | 1.90E-05 | 1.39E-03 | 1.77E-02 |
| Trichococcus_B          | Methylobacterium_B   | 1.00E+00  | 2.22E-16 | 2.21E-14 | 1.90E-06 |
| Peptostreptococcus_B    | Microbacterium_B     | -8.28E-01 | 6.70E-04 | 3.52E-02 | 2.17E-01 |
| Selenihalanaerobacter_B | Microbacterium_B     | 8.36E-01  | 5.31E-04 | 2.89E-02 | 2.17E-01 |

|                               |                 |           |          |          |          |
|-------------------------------|-----------------|-----------|----------|----------|----------|
| Petrimonas_B                  | Microscilla_B   | 1.00E+00  | 2.22E-16 | 2.21E-14 | 1.90E-06 |
| Porphyromonas_B               | Microscilla_B   | 1.00E+00  | 2.22E-16 | 2.21E-14 | 1.90E-06 |
| Propionibacterium_B           | Microscilla_B   | 1.00E+00  | 2.22E-16 | 2.21E-14 | 1.90E-06 |
| Pseudomonas_B                 | Microscilla_B   | 1.00E+00  | 2.22E-16 | 2.21E-14 | 1.90E-06 |
| Sanguibacter_B                | Microscilla_B   | 1.00E+00  | 2.22E-16 | 2.21E-14 | 1.90E-06 |
| Shuttleworthia_B              | Microscilla_B   | -8.88E-01 | 8.23E-05 | 5.41E-03 | 6.01E-02 |
| Spirochaeta_B                 | Microscilla_B   | 1.00E+00  | 2.22E-16 | 2.21E-14 | 1.90E-06 |
| unclassified_F                | Microscilla_B   | -8.44E-01 | 4.25E-04 | 2.37E-02 | 2.17E-01 |
| Robinsoniella_B               | Moryella_B      | 8.50E-01  | 3.46E-04 | 1.97E-02 | 2.17E-01 |
| Otidea_F                      | Myceligeners_B  | 1.00E+00  | 2.22E-16 | 2.21E-14 | 1.90E-06 |
| Quatronicoccus_B              | Myceligeners_B  | 1.00E+00  | 2.22E-16 | 2.21E-14 | 1.90E-06 |
| Roseospirillum_B              | Myceligeners_B  | 1.00E+00  | 2.22E-16 | 2.21E-14 | 1.90E-06 |
| Thermodesulfobium_B           | Myceligeners_B  | 1.00E+00  | 2.22E-16 | 2.21E-14 | 1.90E-06 |
| Yaniella_B                    | Myceligeners_B  | 1.00E+00  | 2.22E-16 | 2.21E-14 | 1.90E-06 |
| Tepidimicrobium_B             | Natantispora_F  | 1.00E+00  | 2.22E-16 | 2.21E-14 | 1.90E-06 |
| Thermotalea_B                 | Natantispora_F  | 8.71E-01  | 1.66E-04 | 1.01E-02 | 1.04E-01 |
| Nubsella_B                    | Nesiotobacter_B | 8.16E-01  | 9.31E-04 | 4.65E-02 | 2.68E-01 |
| Oxalicibacterium_B            | Nesiotobacter_B | 1.00E+00  | 2.22E-16 | 2.21E-14 | 1.90E-06 |
| Paracoccus_B                  | Nesiotobacter_B | 1.00E+00  | 2.22E-16 | 2.21E-14 | 1.90E-06 |
| Paralactobacillus_B           | Nesiotobacter_B | 1.00E+00  | 2.22E-16 | 2.21E-14 | 1.90E-06 |
| Proteiniphilum_B              | Nesiotobacter_B | 1.00E+00  | 2.22E-16 | 2.21E-14 | 1.90E-06 |
| Psychrobacter_B               | Nesiotobacter_B | 1.00E+00  | 2.22E-16 | 2.21E-14 | 1.90E-06 |
| Sediminibacterium_B           | Nesiotobacter_B | 1.00E+00  | 2.22E-16 | 2.21E-14 | 1.90E-06 |
| Selenomonas_B                 | Nesiotobacter_B | 1.00E+00  | 2.22E-16 | 2.21E-14 | 1.90E-06 |
| Stenoxybacter_B               | Nesiotobacter_B | 1.00E+00  | 2.22E-16 | 2.21E-14 | 1.90E-06 |
| Talaromyces_F                 | Nesiotobacter_B | 1.00E+00  | 2.22E-16 | 2.21E-14 | 1.90E-06 |
| unclassified_Pezizomycotina_F | Nesiotobacter_B | -1.00E+00 | 2.22E-16 | 2.21E-14 | 1.90E-06 |
| Okibacterium_B                | Nicoletella_B   | 1.00E+00  | 2.22E-16 | 2.21E-14 | 1.90E-06 |
| Olsenella_B                   | Nicoletella_B   | -9.47E-01 | 1.78E-06 | 1.57E-04 | 2.81E-03 |
| Parascardovia_B               | Nicoletella_B   | 1.00E+00  | 2.22E-16 | 2.21E-14 | 1.90E-06 |

|                               |                   |           |          |          |          |
|-------------------------------|-------------------|-----------|----------|----------|----------|
| Rhodovarius_B                 | Nicoletella_B     | 1.00E+00  | 2.22E-16 | 2.21E-14 | 1.90E-06 |
| Slackia_B                     | Nicoletella_B     | -9.07E-01 | 3.20E-05 | 2.25E-03 | 4.17E-02 |
| Thermovenabulum_B             | Nicoletella_B     | 1.00E+00  | 2.22E-16 | 2.21E-14 | 1.90E-06 |
| Olivibacter_B                 | Nocardioides_B    | -9.17E-01 | 1.75E-05 | 1.30E-03 | 7.84E-03 |
| Pelomonas_B                   | Nocardioides_B    | 1.00E+00  | 2.22E-16 | 2.21E-14 | 1.90E-06 |
| Unc_Kirschsteiniethelia_F     | Nocardioides_B    | -1.00E+00 | 2.22E-16 | 2.21E-14 | 1.90E-06 |
| Verrucomicrobium_B            | Nocardioides_B    | -8.93E-01 | 6.47E-05 | 4.33E-03 | 6.01E-02 |
| Rubritepida_B                 | Novosphingobium_B | 1.00E+00  | 2.22E-16 | 2.21E-14 | 1.90E-06 |
| Segetibacter_B                | Novosphingobium_B | -9.30E-01 | 7.53E-06 | 6.16E-04 | 7.84E-03 |
| Shimazuella_B                 | Novosphingobium_B | 9.91E-01  | 1.88E-10 | 1.85E-08 | 5.47E-06 |
| Zhouia_B                      | Novosphingobium_B | -9.73E-01 | 5.89E-08 | 5.63E-06 | 2.87E-04 |
| Oxalicibacterium_B            | Nubsella_B        | 8.16E-01  | 9.31E-04 | 4.65E-02 | 2.68E-01 |
| Paracoccus_B                  | Nubsella_B        | 8.16E-01  | 9.31E-04 | 4.65E-02 | 2.68E-01 |
| Paralactobacillus_B           | Nubsella_B        | 8.16E-01  | 9.31E-04 | 4.65E-02 | 2.68E-01 |
| Proteiniphilum_B              | Nubsella_B        | 8.16E-01  | 9.31E-04 | 4.65E-02 | 2.68E-01 |
| Psychrobacter_B               | Nubsella_B        | 8.16E-01  | 9.31E-04 | 4.65E-02 | 2.68E-01 |
| Sediminibacterium_B           | Nubsella_B        | 8.16E-01  | 9.31E-04 | 4.65E-02 | 2.68E-01 |
| Selenomonas_B                 | Nubsella_B        | 8.16E-01  | 9.31E-04 | 4.65E-02 | 2.68E-01 |
| Sphingobacterium_B            | Nubsella_B        | 8.48E-01  | 3.68E-04 | 2.08E-02 | 2.17E-01 |
| Stenoxybacter_B               | Nubsella_B        | 8.16E-01  | 9.31E-04 | 4.65E-02 | 2.68E-01 |
| Talaromyces_F                 | Nubsella_B        | 8.16E-01  | 9.31E-04 | 4.65E-02 | 2.68E-01 |
| unclassified_Pezizomycotina_F | Nubsella_B        | -8.16E-01 | 9.31E-04 | 4.65E-02 | 2.68E-01 |
| Olsenella_B                   | Okibacterium_B    | -9.47E-01 | 1.78E-06 | 1.57E-04 | 2.81E-03 |
| Parascardovia_B               | Okibacterium_B    | 1.00E+00  | 2.22E-16 | 2.21E-14 | 1.90E-06 |
| Rhodovarius_B                 | Okibacterium_B    | 1.00E+00  | 2.22E-16 | 2.21E-14 | 1.90E-06 |
| Slackia_B                     | Okibacterium_B    | -9.07E-01 | 3.20E-05 | 2.25E-03 | 4.17E-02 |
| Thermovenabulum_B             | Okibacterium_B    | 1.00E+00  | 2.22E-16 | 2.21E-14 | 1.90E-06 |
| Pelomonas_B                   | Olivibacter_B     | -9.17E-01 | 1.75E-05 | 1.30E-03 | 7.84E-03 |
| Unc_Kirschsteiniethelia_F     | Olivibacter_B     | 9.17E-01  | 1.75E-05 | 1.30E-03 | 7.84E-03 |
| Parascardovia_B               | Olsenella_B       | -9.47E-01 | 1.78E-06 | 1.57E-04 | 2.81E-03 |

|                      |                      |           |          |          |          |
|----------------------|----------------------|-----------|----------|----------|----------|
| Rhodovarius_B        | Olsenella_B          | -9.47E-01 | 1.78E-06 | 1.57E-04 | 2.81E-03 |
| Slackia_B            | Olsenella_B          | 8.48E-01  | 3.69E-04 | 2.09E-02 | 2.17E-01 |
| Thermovenabulum_B    | Olsenella_B          | -9.47E-01 | 1.78E-06 | 1.57E-04 | 2.81E-03 |
| Sporobacterium_B     | Oribacterium_B       | 8.16E-01  | 9.51E-04 | 4.73E-02 | 2.68E-01 |
| Staphylococcus_B     | Oribacterium_B       | -8.14E-01 | 9.84E-04 | 4.86E-02 | 2.68E-01 |
| Stenotrophomonas_B   | Oribacterium_B       | -9.07E-01 | 3.17E-05 | 2.22E-03 | 3.13E-02 |
| Oxalophagus_B        | Ornithinimicrobium_B | -9.54E-01 | 8.65E-07 | 7.82E-05 | 2.81E-03 |
| Pseudozobellia_B     | Ornithinimicrobium_B | -9.16E-01 | 1.90E-05 | 1.39E-03 | 1.77E-02 |
| Rhodopila_B          | Ornithinimicrobium_B | 1.00E+00  | 2.22E-16 | 2.21E-14 | 1.90E-06 |
| Streptophyta_B       | Ornithinimicrobium_B | -9.16E-01 | 1.90E-05 | 1.39E-03 | 1.77E-02 |
| Trichococcus_B       | Ornithinimicrobium_B | 1.00E+00  | 2.22E-16 | 2.21E-14 | 1.90E-06 |
| Parachlamydia_B      | Ornithobacterium_B   | -9.11E-01 | 2.50E-05 | 1.78E-03 | 3.13E-02 |
| Sphaerobacter_B      | Ornithobacterium_B   | -9.11E-01 | 2.50E-05 | 1.78E-03 | 3.13E-02 |
| Sporanaerobacter_B   | Ornithobacterium_B   | -9.11E-01 | 2.50E-05 | 1.78E-03 | 3.13E-02 |
| Unc_Kockovaella_F    | Ornithobacterium_B   | -9.11E-01 | 2.50E-05 | 1.78E-03 | 3.13E-02 |
| Venenivibrio_B       | Ornithobacterium_B   | -9.11E-01 | 2.50E-05 | 1.78E-03 | 3.13E-02 |
| Zunongwangia_B       | Ornithobacterium_B   | -9.11E-01 | 2.50E-05 | 1.78E-03 | 3.13E-02 |
| Owenweeksia_B        | Oscillibacter_B      | 8.34E-01  | 5.63E-04 | 3.04E-02 | 2.17E-01 |
| Quatrionicoccus_B    | Otidea_F             | 1.00E+00  | 2.22E-16 | 2.21E-14 | 1.90E-06 |
| Roseospirillum_B     | Otidea_F             | 1.00E+00  | 2.22E-16 | 2.21E-14 | 1.90E-06 |
| Thermodesulfobium_B  | Otidea_F             | 1.00E+00  | 2.22E-16 | 2.21E-14 | 1.90E-06 |
| Yaniella_B           | Otidea_F             | 1.00E+00  | 2.22E-16 | 2.21E-14 | 1.90E-06 |
| Parasporobacterium_B | Owenweeksia_B        | 8.17E-01  | 9.07E-04 | 4.55E-02 | 2.68E-01 |
| Succiniclasticum_B   | Owenweeksia_B        | 8.45E-01  | 4.02E-04 | 2.26E-02 | 2.17E-01 |
| Paracoccus_B         | Oxalicibacterium_B   | 1.00E+00  | 2.22E-16 | 2.21E-14 | 1.90E-06 |
| Paralactobacillus_B  | Oxalicibacterium_B   | 1.00E+00  | 2.22E-16 | 2.21E-14 | 1.90E-06 |
| Proteiniphilum_B     | Oxalicibacterium_B   | 1.00E+00  | 2.22E-16 | 2.21E-14 | 1.90E-06 |
| Psychrobacter_B      | Oxalicibacterium_B   | 1.00E+00  | 2.22E-16 | 2.21E-14 | 1.90E-06 |
| Sediminibacterium_B  | Oxalicibacterium_B   | 1.00E+00  | 2.22E-16 | 2.21E-14 | 1.90E-06 |
| Selenomonas_B        | Oxalicibacterium_B   | 1.00E+00  | 2.22E-16 | 2.21E-14 | 1.90E-06 |

|                               |                     |           |          |          |          |
|-------------------------------|---------------------|-----------|----------|----------|----------|
| Stenoxybacter_B               | Oxalicibacterium_B  | 1.00E+00  | 2.22E-16 | 2.21E-14 | 1.90E-06 |
| Talaromyces_F                 | Oxalicibacterium_B  | 1.00E+00  | 2.22E-16 | 2.21E-14 | 1.90E-06 |
| unclassified_Pezizomycotina_F | Oxalicibacterium_B  | -1.00E+00 | 2.22E-16 | 2.21E-14 | 1.90E-06 |
| Pseudozobellia_B              | Oxalophagus_B       | 8.94E-01  | 6.18E-05 | 4.15E-03 | 6.01E-02 |
| Rhodopila_B                   | Oxalophagus_B       | -9.54E-01 | 8.65E-07 | 7.82E-05 | 2.81E-03 |
| Streptophyta_B                | Oxalophagus_B       | 8.64E-01  | 2.13E-04 | 1.26E-02 | 1.04E-01 |
| Trichococcus_B                | Oxalophagus_B       | -9.54E-01 | 8.65E-07 | 7.82E-05 | 2.81E-03 |
| Unc_Sarcinomyces_F            | Paludibacter_B      | -8.85E-01 | 9.21E-05 | 5.99E-03 | 6.01E-02 |
| Sharpea_B                     | Papillibacter_B     | 8.77E-01  | 1.30E-04 | 8.13E-03 | 6.06E-02 |
| Sphaerobacter_B               | Parachlamydia_B     | 1.00E+00  | 2.22E-16 | 2.21E-14 | 1.90E-06 |
| Sporanaerobacter_B            | Parachlamydia_B     | 1.00E+00  | 2.22E-16 | 2.21E-14 | 1.90E-06 |
| Unc_Kockovaella_F             | Parachlamydia_B     | 1.00E+00  | 2.22E-16 | 2.21E-14 | 1.90E-06 |
| Venenivibrio_B                | Parachlamydia_B     | 1.00E+00  | 2.22E-16 | 2.21E-14 | 1.90E-06 |
| Zunongwangia_B                | Parachlamydia_B     | 1.00E+00  | 2.22E-16 | 2.21E-14 | 1.90E-06 |
| Paralactobacillus_B           | Paracoccus_B        | 1.00E+00  | 2.22E-16 | 2.21E-14 | 1.90E-06 |
| Proteiniphilum_B              | Paracoccus_B        | 1.00E+00  | 2.22E-16 | 2.21E-14 | 1.90E-06 |
| Psychrobacter_B               | Paracoccus_B        | 1.00E+00  | 2.22E-16 | 2.21E-14 | 1.90E-06 |
| Sediminibacterium_B           | Paracoccus_B        | 1.00E+00  | 2.22E-16 | 2.21E-14 | 1.90E-06 |
| Selenomonas_B                 | Paracoccus_B        | 1.00E+00  | 2.22E-16 | 2.21E-14 | 1.90E-06 |
| Stenoxybacter_B               | Paracoccus_B        | 1.00E+00  | 2.22E-16 | 2.21E-14 | 1.90E-06 |
| Talaromyces_F                 | Paracoccus_B        | 1.00E+00  | 2.22E-16 | 2.21E-14 | 1.90E-06 |
| unclassified_Pezizomycotina_F | Paracoccus_B        | -1.00E+00 | 2.22E-16 | 2.21E-14 | 1.90E-06 |
| Proteiniphilum_B              | Paralactobacillus_B | 1.00E+00  | 2.22E-16 | 2.21E-14 | 1.90E-06 |
| Psychrobacter_B               | Paralactobacillus_B | 1.00E+00  | 2.22E-16 | 2.21E-14 | 1.90E-06 |
| Sediminibacterium_B           | Paralactobacillus_B | 1.00E+00  | 2.22E-16 | 2.21E-14 | 1.90E-06 |
| Selenomonas_B                 | Paralactobacillus_B | 1.00E+00  | 2.22E-16 | 2.21E-14 | 1.90E-06 |
| Stenoxybacter_B               | Paralactobacillus_B | 1.00E+00  | 2.22E-16 | 2.21E-14 | 1.90E-06 |
| Talaromyces_F                 | Paralactobacillus_B | 1.00E+00  | 2.22E-16 | 2.21E-14 | 1.90E-06 |
| unclassified_Pezizomycotina_F | Paralactobacillus_B | -1.00E+00 | 2.22E-16 | 2.21E-14 | 1.90E-06 |
| Sporacetigenium_B             | Parapedobacter_B    | -9.34E-01 | 5.64E-06 | 4.71E-04 | 7.84E-03 |

|                            |                      |           |          |          |          |
|----------------------------|----------------------|-----------|----------|----------|----------|
| Stenothermobacter_B        | Parapedobacter_B     | 1.00E+00  | 2.22E-16 | 2.21E-14 | 1.90E-06 |
| Rhodovarius_B              | Parascardovia_B      | 1.00E+00  | 2.22E-16 | 2.21E-14 | 1.90E-06 |
| Slackia_B                  | Parascardovia_B      | -9.07E-01 | 3.20E-05 | 2.25E-03 | 4.17E-02 |
| Thermovenabulum_B          | Parascardovia_B      | 1.00E+00  | 2.22E-16 | 2.21E-14 | 1.90E-06 |
| Schwartzia_B               | Parasegetibacter_B   | 9.34E-01  | 5.46E-06 | 4.57E-04 | 7.84E-03 |
| Tepidanaerobacter_B        | Parasegetibacter_B   | -9.42E-01 | 2.86E-06 | 2.46E-04 | 7.84E-03 |
| Thermoflavimicrobium_B     | Parasegetibacter_B   | -9.42E-01 | 2.86E-06 | 2.46E-04 | 7.84E-03 |
| Unc_Verticillium_F         | Parasegetibacter_B   | -9.42E-01 | 2.86E-06 | 2.46E-04 | 7.84E-03 |
| Phascolarctobacterium_B    | Parasporobacterium_B | 8.63E-01  | 2.19E-04 | 1.29E-02 | 2.17E-01 |
| Pirellula_B                | Parasporobacterium_B | 8.63E-01  | 2.19E-04 | 1.29E-02 | 2.17E-01 |
| Rudanella_B                | Parasporobacterium_B | 8.63E-01  | 2.19E-04 | 1.29E-02 | 2.17E-01 |
| Succiniclasticum_B         | Parasporobacterium_B | 8.19E-01  | 8.76E-04 | 4.42E-02 | 2.68E-01 |
| Thermonema_B               | Parasporobacterium_B | 8.63E-01  | 2.19E-04 | 1.29E-02 | 2.17E-01 |
| Tropheryma_B               | Parasporobacterium_B | 8.63E-01  | 2.19E-04 | 1.29E-02 | 2.17E-01 |
| Unc_Cryptococcus_F         | Parasporobacterium_B | 8.63E-01  | 2.19E-04 | 1.29E-02 | 2.17E-01 |
| Verminephrobacter_B        | Parasporobacterium_B | 8.63E-01  | 2.19E-04 | 1.29E-02 | 2.17E-01 |
| Scytinostroma_F            | Parvimonas_B         | -9.47E-01 | 1.86E-06 | 1.63E-04 | 4.74E-03 |
| Unc_Kirschsteiniiothelia_F | Pelomonas_B          | -1.00E+00 | 2.22E-16 | 2.21E-14 | 1.90E-06 |
| Verrucomicrobium_B         | Pelomonas_B          | -8.93E-01 | 6.47E-05 | 4.33E-03 | 6.01E-02 |
| Sporobacterium_B           | Pelospora_B          | 9.46E-01  | 1.96E-06 | 1.71E-04 | 4.74E-03 |
| Stenotrophomonas_B         | Pelospora_B          | -9.38E-01 | 3.98E-06 | 3.38E-04 | 7.84E-03 |
| Tannerella_B               | Pelospora_B          | 8.99E-01  | 4.95E-05 | 3.38E-03 | 4.24E-02 |
| Planococcus_B              | Penicillliopsis_F    | 1.00E+00  | 2.22E-16 | 2.21E-14 | 1.90E-06 |
| Selenihalanaerobacter_B    | Peptostreptococcus_B | -9.51E-01 | 1.20E-06 | 1.08E-04 | 2.81E-03 |
| Prolixibacter_B            | Peredibacter_B       | -8.19E-01 | 8.59E-04 | 4.35E-02 | 2.68E-01 |
| Pseudobutyrvibrio_B        | Persicitalea_B       | -9.35E-01 | 5.27E-06 | 4.42E-04 | 7.84E-03 |
| Porphyromonas_B            | Petrimonas_B         | 1.00E+00  | 2.22E-16 | 2.21E-14 | 1.90E-06 |
| Propionibacterium_B        | Petrimonas_B         | 1.00E+00  | 2.22E-16 | 2.21E-14 | 1.90E-06 |
| Pseudomonas_B              | Petrimonas_B         | 1.00E+00  | 2.22E-16 | 2.21E-14 | 1.90E-06 |
| Sanguibacter_B             | Petrimonas_B         | 1.00E+00  | 2.22E-16 | 2.21E-14 | 1.90E-06 |

|                     |                         |           |          |          |          |
|---------------------|-------------------------|-----------|----------|----------|----------|
| Shuttleworthia_B    | Petrimonas_B            | -8.88E-01 | 8.23E-05 | 5.41E-03 | 6.01E-02 |
| Spirochaeta_B       | Petrimonas_B            | 1.00E+00  | 2.22E-16 | 2.21E-14 | 1.90E-06 |
| unclassified_F      | Petrimonas_B            | -8.44E-01 | 4.25E-04 | 2.37E-02 | 2.17E-01 |
| Pirellula_B         | Phascolarctobacterium_B | 1.00E+00  | 2.22E-16 | 2.21E-14 | 1.90E-06 |
| Rhodopirellula_B    | Phascolarctobacterium_B | -8.76E-01 | 1.33E-04 | 8.28E-03 | 7.38E-02 |
| Rudanella_B         | Phascolarctobacterium_B | 1.00E+00  | 2.22E-16 | 2.21E-14 | 1.90E-06 |
| Thermonema_B        | Phascolarctobacterium_B | 1.00E+00  | 2.22E-16 | 2.21E-14 | 1.90E-06 |
| Tropheryma_B        | Phascolarctobacterium_B | 1.00E+00  | 2.22E-16 | 2.21E-14 | 1.90E-06 |
| Unc_Cryptococcus_F  | Phascolarctobacterium_B | 1.00E+00  | 2.22E-16 | 2.21E-14 | 1.90E-06 |
| Verminephrobacter_B | Phascolarctobacterium_B | 1.00E+00  | 2.22E-16 | 2.21E-14 | 1.90E-06 |
| Rhodopirellula_B    | Pirellula_B             | -8.76E-01 | 1.33E-04 | 8.28E-03 | 7.38E-02 |
| Rudanella_B         | Pirellula_B             | 1.00E+00  | 2.22E-16 | 2.21E-14 | 1.90E-06 |
| Thermonema_B        | Pirellula_B             | 1.00E+00  | 2.22E-16 | 2.21E-14 | 1.90E-06 |
| Tropheryma_B        | Pirellula_B             | 1.00E+00  | 2.22E-16 | 2.21E-14 | 1.90E-06 |
| Unc_Cryptococcus_F  | Pirellula_B             | 1.00E+00  | 2.22E-16 | 2.21E-14 | 1.90E-06 |
| Verminephrobacter_B | Pirellula_B             | 1.00E+00  | 2.22E-16 | 2.21E-14 | 1.90E-06 |
| Propionibacterium_B | Porphyromonas_B         | 1.00E+00  | 2.22E-16 | 2.21E-14 | 1.90E-06 |
| Pseudomonas_B       | Porphyromonas_B         | 1.00E+00  | 2.22E-16 | 2.21E-14 | 1.90E-06 |
| Sanguibacter_B      | Porphyromonas_B         | 1.00E+00  | 2.22E-16 | 2.21E-14 | 1.90E-06 |
| Shuttleworthia_B    | Porphyromonas_B         | -8.88E-01 | 8.23E-05 | 5.41E-03 | 6.01E-02 |
| Spirochaeta_B       | Porphyromonas_B         | 1.00E+00  | 2.22E-16 | 2.21E-14 | 1.90E-06 |
| unclassified_F      | Porphyromonas_B         | -8.44E-01 | 4.25E-04 | 2.37E-02 | 2.17E-01 |
| Rhodothermus_B      | Prolixibacter_B         | -9.86E-01 | 1.64E-09 | 1.60E-07 | 2.89E-05 |
| Pseudomonas_B       | Propionibacterium_B     | 1.00E+00  | 2.22E-16 | 2.21E-14 | 1.90E-06 |
| Sanguibacter_B      | Propionibacterium_B     | 1.00E+00  | 2.22E-16 | 2.21E-14 | 1.90E-06 |
| Shuttleworthia_B    | Propionibacterium_B     | -8.88E-01 | 8.23E-05 | 5.41E-03 | 6.01E-02 |
| Spirochaeta_B       | Propionibacterium_B     | 1.00E+00  | 2.22E-16 | 2.21E-14 | 1.90E-06 |
| unclassified_F      | Propionibacterium_B     | -8.44E-01 | 4.25E-04 | 2.37E-02 | 2.17E-01 |
| Psychrobacter_B     | Proteiniphilum_B        | 1.00E+00  | 2.22E-16 | 2.21E-14 | 1.90E-06 |
| Sediminibacterium_B | Proteiniphilum_B        | 1.00E+00  | 2.22E-16 | 2.21E-14 | 1.90E-06 |

|                               |                          |           |          |          |          |
|-------------------------------|--------------------------|-----------|----------|----------|----------|
| Selenomonas_B                 | Proteiniphilum_B         | 1.00E+00  | 2.22E-16 | 2.21E-14 | 1.90E-06 |
| Stenoxybacter_B               | Proteiniphilum_B         | 1.00E+00  | 2.22E-16 | 2.21E-14 | 1.90E-06 |
| Talaromyces_F                 | Proteiniphilum_B         | 1.00E+00  | 2.22E-16 | 2.21E-14 | 1.90E-06 |
| unclassified_Pezizomycotina_F | Proteiniphilum_B         | -1.00E+00 | 2.22E-16 | 2.21E-14 | 1.90E-06 |
| Robinsoniella_B               | Protomyces_F             | 8.56E-01  | 2.85E-04 | 1.65E-02 | 2.17E-01 |
| Ruminococcus_B                | Pseudobutyrvibrio_B      | 8.30E-01  | 6.41E-04 | 3.39E-02 | 2.17E-01 |
| Sanguibacter_B                | Pseudomonas_B            | 1.00E+00  | 2.22E-16 | 2.21E-14 | 1.90E-06 |
| Shuttleworthia_B              | Pseudomonas_B            | -8.88E-01 | 8.23E-05 | 5.41E-03 | 6.01E-02 |
| Spirochaeta_B                 | Pseudomonas_B            | 1.00E+00  | 2.22E-16 | 2.21E-14 | 1.90E-06 |
| unclassified_F                | Pseudomonas_B            | -8.44E-01 | 4.25E-04 | 2.37E-02 | 2.17E-01 |
| Roseburia_B                   | Pseudosphingobacterium_B | 9.41E-01  | 3.19E-06 | 2.73E-04 | 7.84E-03 |
| Syntrophococcus_B             | Pseudosphingobacterium_B | 8.54E-01  | 3.08E-04 | 1.77E-02 | 2.17E-01 |
| Rhodopila_B                   | Pseudozobellia_B         | -9.16E-01 | 1.90E-05 | 1.39E-03 | 1.77E-02 |
| Streptophyta_B                | Pseudozobellia_B         | 8.38E-01  | 5.04E-04 | 2.76E-02 | 2.17E-01 |
| Trichococcus_B                | Pseudozobellia_B         | -9.16E-01 | 1.90E-05 | 1.39E-03 | 1.77E-02 |
| Sediminibacterium_B           | Psychrobacter_B          | 1.00E+00  | 2.22E-16 | 2.21E-14 | 1.90E-06 |
| Selenomonas_B                 | Psychrobacter_B          | 1.00E+00  | 2.22E-16 | 2.21E-14 | 1.90E-06 |
| Stenoxybacter_B               | Psychrobacter_B          | 1.00E+00  | 2.22E-16 | 2.21E-14 | 1.90E-06 |
| Talaromyces_F                 | Psychrobacter_B          | 1.00E+00  | 2.22E-16 | 2.21E-14 | 1.90E-06 |
| unclassified_Pezizomycotina_F | Psychrobacter_B          | -1.00E+00 | 2.22E-16 | 2.21E-14 | 1.90E-06 |
| Sarcina_B                     | Pyramidobacter_B         | -8.15E-01 | 9.66E-04 | 4.79E-02 | 2.68E-01 |
| Roseospirillum_B              | Quatrionicoccus_B        | 1.00E+00  | 2.22E-16 | 2.21E-14 | 1.90E-06 |
| Thermodesulfobium_B           | Quatrionicoccus_B        | 1.00E+00  | 2.22E-16 | 2.21E-14 | 1.90E-06 |
| Yaniella_B                    | Quatrionicoccus_B        | 1.00E+00  | 2.22E-16 | 2.21E-14 | 1.90E-06 |
| Rikenella_B                   | Rapidithrix_B            | 8.22E-01  | 8.07E-04 | 4.12E-02 | 2.68E-01 |
| Solibacillus_B                | Rapidithrix_B            | 1.00E+00  | 2.22E-16 | 2.21E-14 | 1.90E-06 |
| Streptophyta_B                | Rhodopila_B              | -9.16E-01 | 1.90E-05 | 1.39E-03 | 1.77E-02 |
| Trichococcus_B                | Rhodopila_B              | 1.00E+00  | 2.22E-16 | 2.21E-14 | 1.90E-06 |
| Rudanella_B                   | Rhodopirellula_B         | -8.76E-01 | 1.33E-04 | 8.28E-03 | 7.38E-02 |
| Thermonema_B                  | Rhodopirellula_B         | -8.76E-01 | 1.33E-04 | 8.28E-03 | 7.38E-02 |

|                               |                     |           |          |          |          |
|-------------------------------|---------------------|-----------|----------|----------|----------|
| Tropheryma_B                  | Rhodopirellula_B    | -8.76E-01 | 1.33E-04 | 8.28E-03 | 7.38E-02 |
| Unc_Cryptococcus_F            | Rhodopirellula_B    | -8.76E-01 | 1.33E-04 | 8.28E-03 | 7.38E-02 |
| Verminephrobacter_B           | Rhodopirellula_B    | -8.76E-01 | 1.33E-04 | 8.28E-03 | 7.38E-02 |
| Slackia_B                     | Rhodovarius_B       | -9.07E-01 | 3.20E-05 | 2.25E-03 | 4.17E-02 |
| Thermovenabulum_B             | Rhodovarius_B       | 1.00E+00  | 2.22E-16 | 2.21E-14 | 1.90E-06 |
| Solibacillus_B                | Rikenella_B         | 8.22E-01  | 8.07E-04 | 4.12E-02 | 2.68E-01 |
| Solobacterium_B               | Rikenella_B         | 9.00E-01  | 4.56E-05 | 3.13E-03 | 4.17E-02 |
| Syntrophococcus_B             | Roseburia_B         | 8.97E-01  | 5.22E-05 | 3.54E-03 | 6.01E-02 |
| Thermodesulfobium_B           | Roseospirillum_B    | 1.00E+00  | 2.22E-16 | 2.21E-14 | 1.90E-06 |
| Yaniella_B                    | Roseospirillum_B    | 1.00E+00  | 2.22E-16 | 2.21E-14 | 1.90E-06 |
| Segetibacter_B                | Rubritepida_B       | -9.30E-01 | 7.53E-06 | 6.16E-04 | 7.84E-03 |
| Shimazuella_B                 | Rubritepida_B       | 9.91E-01  | 1.88E-10 | 1.85E-08 | 5.47E-06 |
| Zhouia_B                      | Rubritepida_B       | -9.73E-01 | 5.89E-08 | 5.63E-06 | 2.87E-04 |
| Thermonema_B                  | Rudanella_B         | 1.00E+00  | 2.22E-16 | 2.21E-14 | 1.90E-06 |
| Tropheryma_B                  | Rudanella_B         | 1.00E+00  | 2.22E-16 | 2.21E-14 | 1.90E-06 |
| Unc_Cryptococcus_F            | Rudanella_B         | 1.00E+00  | 2.22E-16 | 2.21E-14 | 1.90E-06 |
| Verminephrobacter_B           | Rudanella_B         | 1.00E+00  | 2.22E-16 | 2.21E-14 | 1.90E-06 |
| Scytinostroma_F               | Ruminococcus_B      | 8.26E-01  | 7.17E-04 | 3.73E-02 | 2.68E-01 |
| Shuttleworthia_B              | Sanguibacter_B      | -8.88E-01 | 8.23E-05 | 5.41E-03 | 6.01E-02 |
| Spirochaeta_B                 | Sanguibacter_B      | 1.00E+00  | 2.22E-16 | 2.21E-14 | 1.90E-06 |
| unclassified_F                | Sanguibacter_B      | -8.44E-01 | 4.25E-04 | 2.37E-02 | 2.17E-01 |
| Tepidanaerobacter_B           | Schwartzia_B        | -9.26E-01 | 9.83E-06 | 7.85E-04 | 7.84E-03 |
| Thermoflavimicrobium_B        | Schwartzia_B        | -9.26E-01 | 9.83E-06 | 7.85E-04 | 7.84E-03 |
| Unc_Verticillium_F            | Schwartzia_B        | -9.26E-01 | 9.83E-06 | 7.85E-04 | 7.84E-03 |
| Sediminitomix_B               | Sedimentibacter_B   | -8.18E-01 | 8.87E-04 | 4.46E-02 | 2.68E-01 |
| Xylanibacter_B                | Sedimentibacter_B   | 8.73E-01  | 1.50E-04 | 9.20E-03 | 7.38E-02 |
| Selenomonas_B                 | Sediminibacterium_B | 1.00E+00  | 2.22E-16 | 2.21E-14 | 1.90E-06 |
| Stenoxybacter_B               | Sediminibacterium_B | 1.00E+00  | 2.22E-16 | 2.21E-14 | 1.90E-06 |
| Talaromyces_F                 | Sediminibacterium_B | 1.00E+00  | 2.22E-16 | 2.21E-14 | 1.90E-06 |
| unclassified_Pezizomycotina_F | Sediminibacterium_B | -1.00E+00 | 2.22E-16 | 2.21E-14 | 1.90E-06 |

|                               |                    |           |          |          |          |
|-------------------------------|--------------------|-----------|----------|----------|----------|
| Syntrophothermus_B            | Sediminicola_B     | 9.91E-01  | 1.88E-10 | 1.85E-08 | 5.47E-06 |
| Tumebacillus_B                | Sediminitomix_B    | -9.90E-01 | 3.42E-10 | 3.36E-08 | 7.72E-06 |
| Shimazuella_B                 | Segetibacter_B     | -9.22E-01 | 1.33E-05 | 1.03E-03 | 7.84E-03 |
| Zhouia_B                      | Segetibacter_B     | 8.53E-01  | 3.14E-04 | 1.81E-02 | 2.17E-01 |
| Stenoxybacter_B               | Selenomonas_B      | 1.00E+00  | 2.22E-16 | 2.21E-14 | 1.90E-06 |
| Talaromyces_F                 | Selenomonas_B      | 1.00E+00  | 2.22E-16 | 2.21E-14 | 1.90E-06 |
| unclassified_Pezizomycotina_F | Selenomonas_B      | -1.00E+00 | 2.22E-16 | 2.21E-14 | 1.90E-06 |
| Zhouia_B                      | Shimazuella_B      | -9.64E-01 | 2.47E-07 | 2.29E-05 | 2.21E-03 |
| Spirochaeta_B                 | Shuttleworthia_B   | -8.88E-01 | 8.23E-05 | 5.41E-03 | 6.01E-02 |
| Syntrophococcus_B             | Shuttleworthia_B   | 8.67E-01  | 1.92E-04 | 1.15E-02 | 1.04E-01 |
| unclassified_F                | Shuttleworthia_B   | 8.38E-01  | 5.05E-04 | 2.76E-02 | 2.17E-01 |
| Thermovenabulum_B             | Slackia_B          | -9.07E-01 | 3.20E-05 | 2.25E-03 | 4.17E-02 |
| Sporanaerobacter_B            | Sphaerobacter_B    | 1.00E+00  | 2.22E-16 | 2.21E-14 | 1.90E-06 |
| Unc_Kockovaella_F             | Sphaerobacter_B    | 1.00E+00  | 2.22E-16 | 2.21E-14 | 1.90E-06 |
| Venenivibrio_B                | Sphaerobacter_B    | 1.00E+00  | 2.22E-16 | 2.21E-14 | 1.90E-06 |
| Zunongwangia_B                | Sphaerobacter_B    | 1.00E+00  | 2.22E-16 | 2.21E-14 | 1.90E-06 |
| Victivallis_B                 | Sphingomonas_B     | 9.85E-01  | 2.45E-09 | 2.39E-07 | 2.87E-04 |
| unclassified_F                | Spirochaeta_B      | -8.44E-01 | 4.25E-04 | 2.37E-02 | 2.17E-01 |
| Stenothermobacter_B           | Sporacetigenium_B  | -9.34E-01 | 5.64E-06 | 4.71E-04 | 7.84E-03 |
| Unc_Kockovaella_F             | Sporanaerobacter_B | 1.00E+00  | 2.22E-16 | 2.21E-14 | 1.90E-06 |
| Venenivibrio_B                | Sporanaerobacter_B | 1.00E+00  | 2.22E-16 | 2.21E-14 | 1.90E-06 |
| Zunongwangia_B                | Sporanaerobacter_B | 1.00E+00  | 2.22E-16 | 2.21E-14 | 1.90E-06 |
| Stenotrophomonas_B            | Sporobacterium_B   | -9.77E-01 | 2.32E-08 | 2.25E-06 | 2.87E-04 |
| Vulcanibacillus_B             | Staphylococcus_B   | 8.36E-01  | 5.31E-04 | 2.89E-02 | 2.17E-01 |
| Talaromyces_F                 | Stenoxybacter_B    | 1.00E+00  | 2.22E-16 | 2.21E-14 | 1.90E-06 |
| unclassified_Pezizomycotina_F | Stenoxybacter_B    | -1.00E+00 | 2.22E-16 | 2.21E-14 | 1.90E-06 |
| Trichococcus_B                | Streptophyta_B     | -9.16E-01 | 1.90E-05 | 1.39E-03 | 1.77E-02 |
| Taphrina_F                    | Succinivibrio_B    | 1.00E+00  | 2.22E-16 | 2.21E-14 | 1.90E-06 |
| Turicibacter_B                | Syntrophococcus_B  | -8.24E-01 | 7.49E-04 | 3.87E-02 | 2.68E-01 |
| unclassified_Pezizomycotina_F | Talaromyces_F      | -1.00E+00 | 2.22E-16 | 2.21E-14 | 1.90E-06 |

|                        |                            |          |          |          |          |
|------------------------|----------------------------|----------|----------|----------|----------|
| Thermoflavimicrobium_B | Tepidanaerobacter_B        | 1.00E+00 | 2.22E-16 | 2.21E-14 | 1.90E-06 |
| Unc_Verticillium_F     | Tepidanaerobacter_B        | 1.00E+00 | 2.22E-16 | 2.21E-14 | 1.90E-06 |
| Thermotalea_B          | Tepidimicrobium_B          | 8.71E-01 | 1.66E-04 | 1.01E-02 | 1.04E-01 |
| Victivallis_B          | Thermicanus_B              | 8.54E-01 | 3.02E-04 | 1.74E-02 | 2.17E-01 |
| Yaniella_B             | Thermodesulfobium_B        | 1.00E+00 | 2.22E-16 | 2.21E-14 | 1.90E-06 |
| Unc_Verticillium_F     | Thermoflavimicrobium_B     | 1.00E+00 | 2.22E-16 | 2.21E-14 | 1.90E-06 |
| Tropheryma_B           | Thermonema_B               | 1.00E+00 | 2.22E-16 | 2.21E-14 | 1.90E-06 |
| Unc_Cryptococcus_F     | Thermonema_B               | 1.00E+00 | 2.22E-16 | 2.21E-14 | 1.90E-06 |
| Verminephrobacter_B    | Thermonema_B               | 1.00E+00 | 2.22E-16 | 2.21E-14 | 1.90E-06 |
| Unc_Cryptococcus_F     | Tropheryma_B               | 1.00E+00 | 2.22E-16 | 2.21E-14 | 1.90E-06 |
| Verminephrobacter_B    | Tropheryma_B               | 1.00E+00 | 2.22E-16 | 2.21E-14 | 1.90E-06 |
| Verminephrobacter_B    | Unc_Cryptococcus_F         | 1.00E+00 | 2.22E-16 | 2.21E-14 | 1.90E-06 |
| Verrucomicrobium_B     | Unc_Kirschsteiniiothelia_F | 8.93E-01 | 6.47E-05 | 4.33E-03 | 6.01E-02 |
| Venenivibrio_B         | Unc_Kockovaella_F          | 1.00E+00 | 2.22E-16 | 2.21E-14 | 1.90E-06 |
| Zunongwangia_B         | Unc_Kockovaella_F          | 1.00E+00 | 2.22E-16 | 2.21E-14 | 1.90E-06 |
| Zunongwangia_B         | Venenivibrio_B             | 1.00E+00 | 2.22E-16 | 2.21E-14 | 1.90E-06 |
